# Supplementary material for: Mapping the global potential distributions of two arboviral vectors Aedes aegypti and Ae. albopictus under changing climate
Source: PubMed Central journal article supplement (PMC6312308; doi:10.1371/journal.pone.0210122), 2018-12-31

S11 File. Visualization of uncertainty estimate associated with present-day and future predictions of *Aedes aegypti* and *Ae. albopictus*.

I. Visualization of uncertainty estimate associated with present-day predictions of *Aedes aegypti*. Uncertainty index was derived from diverse sets of occurrence in M<sub>AXENT</sub> samples; uncertainty index was estimated from the range (maximum—minimum) of predictions in 10 replicate runs in M<sub>AXENT</sub>.

- A) Global uncertainty map
- B) Close-up to South Asia showing the diverse values of uncertainty index.
- C) Close-up to Europe and North Africa showing the diverse values of uncertainty index.
- D) Close-up to Sub-Saharan Africa showing the diverse values of uncertainty index.
- E) Close-up to North America showing the diverse values of uncertainty index.
- F) Close-up to South America showing the diverse values of uncertainty index.

A

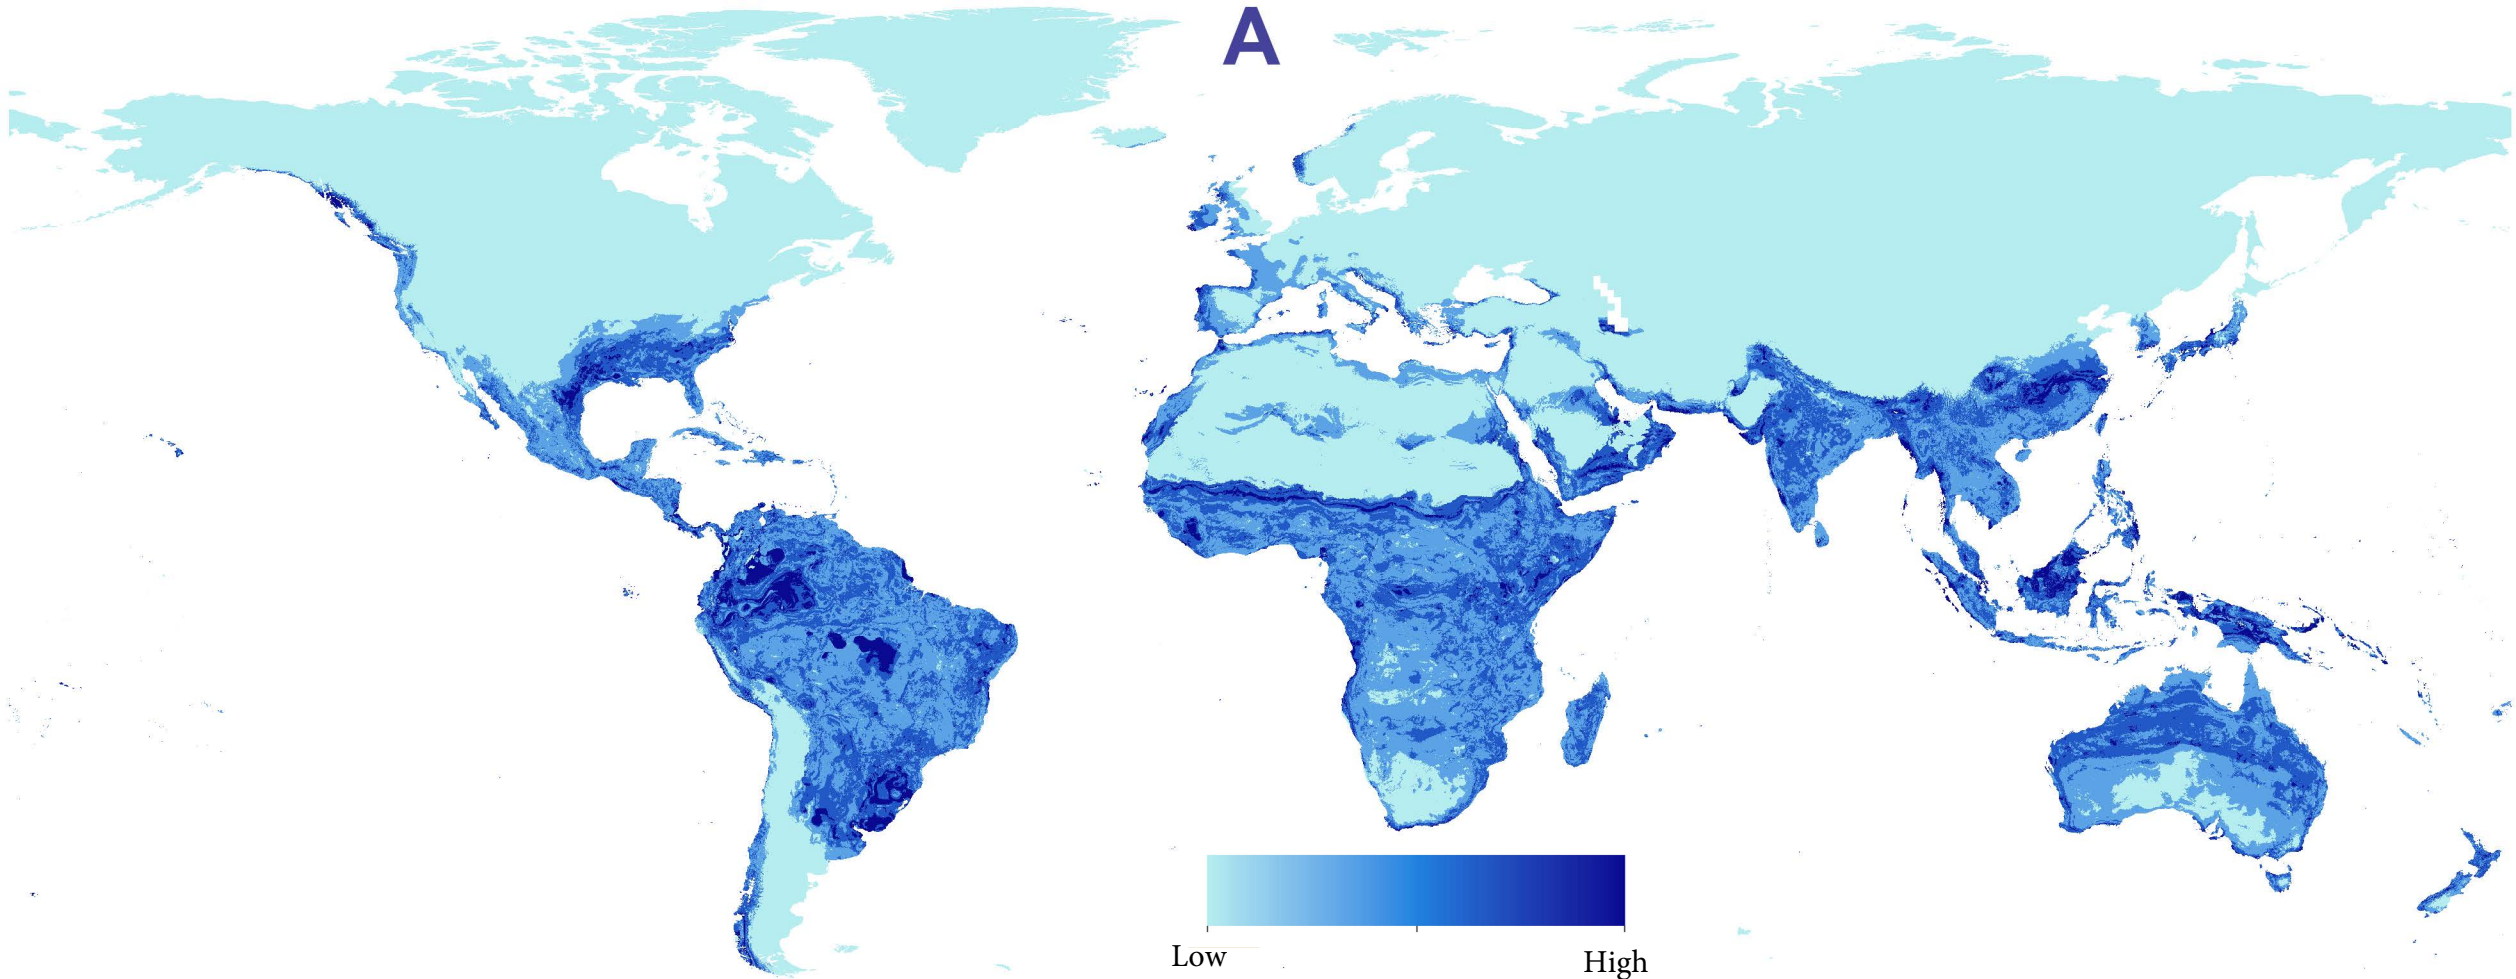

Low

High

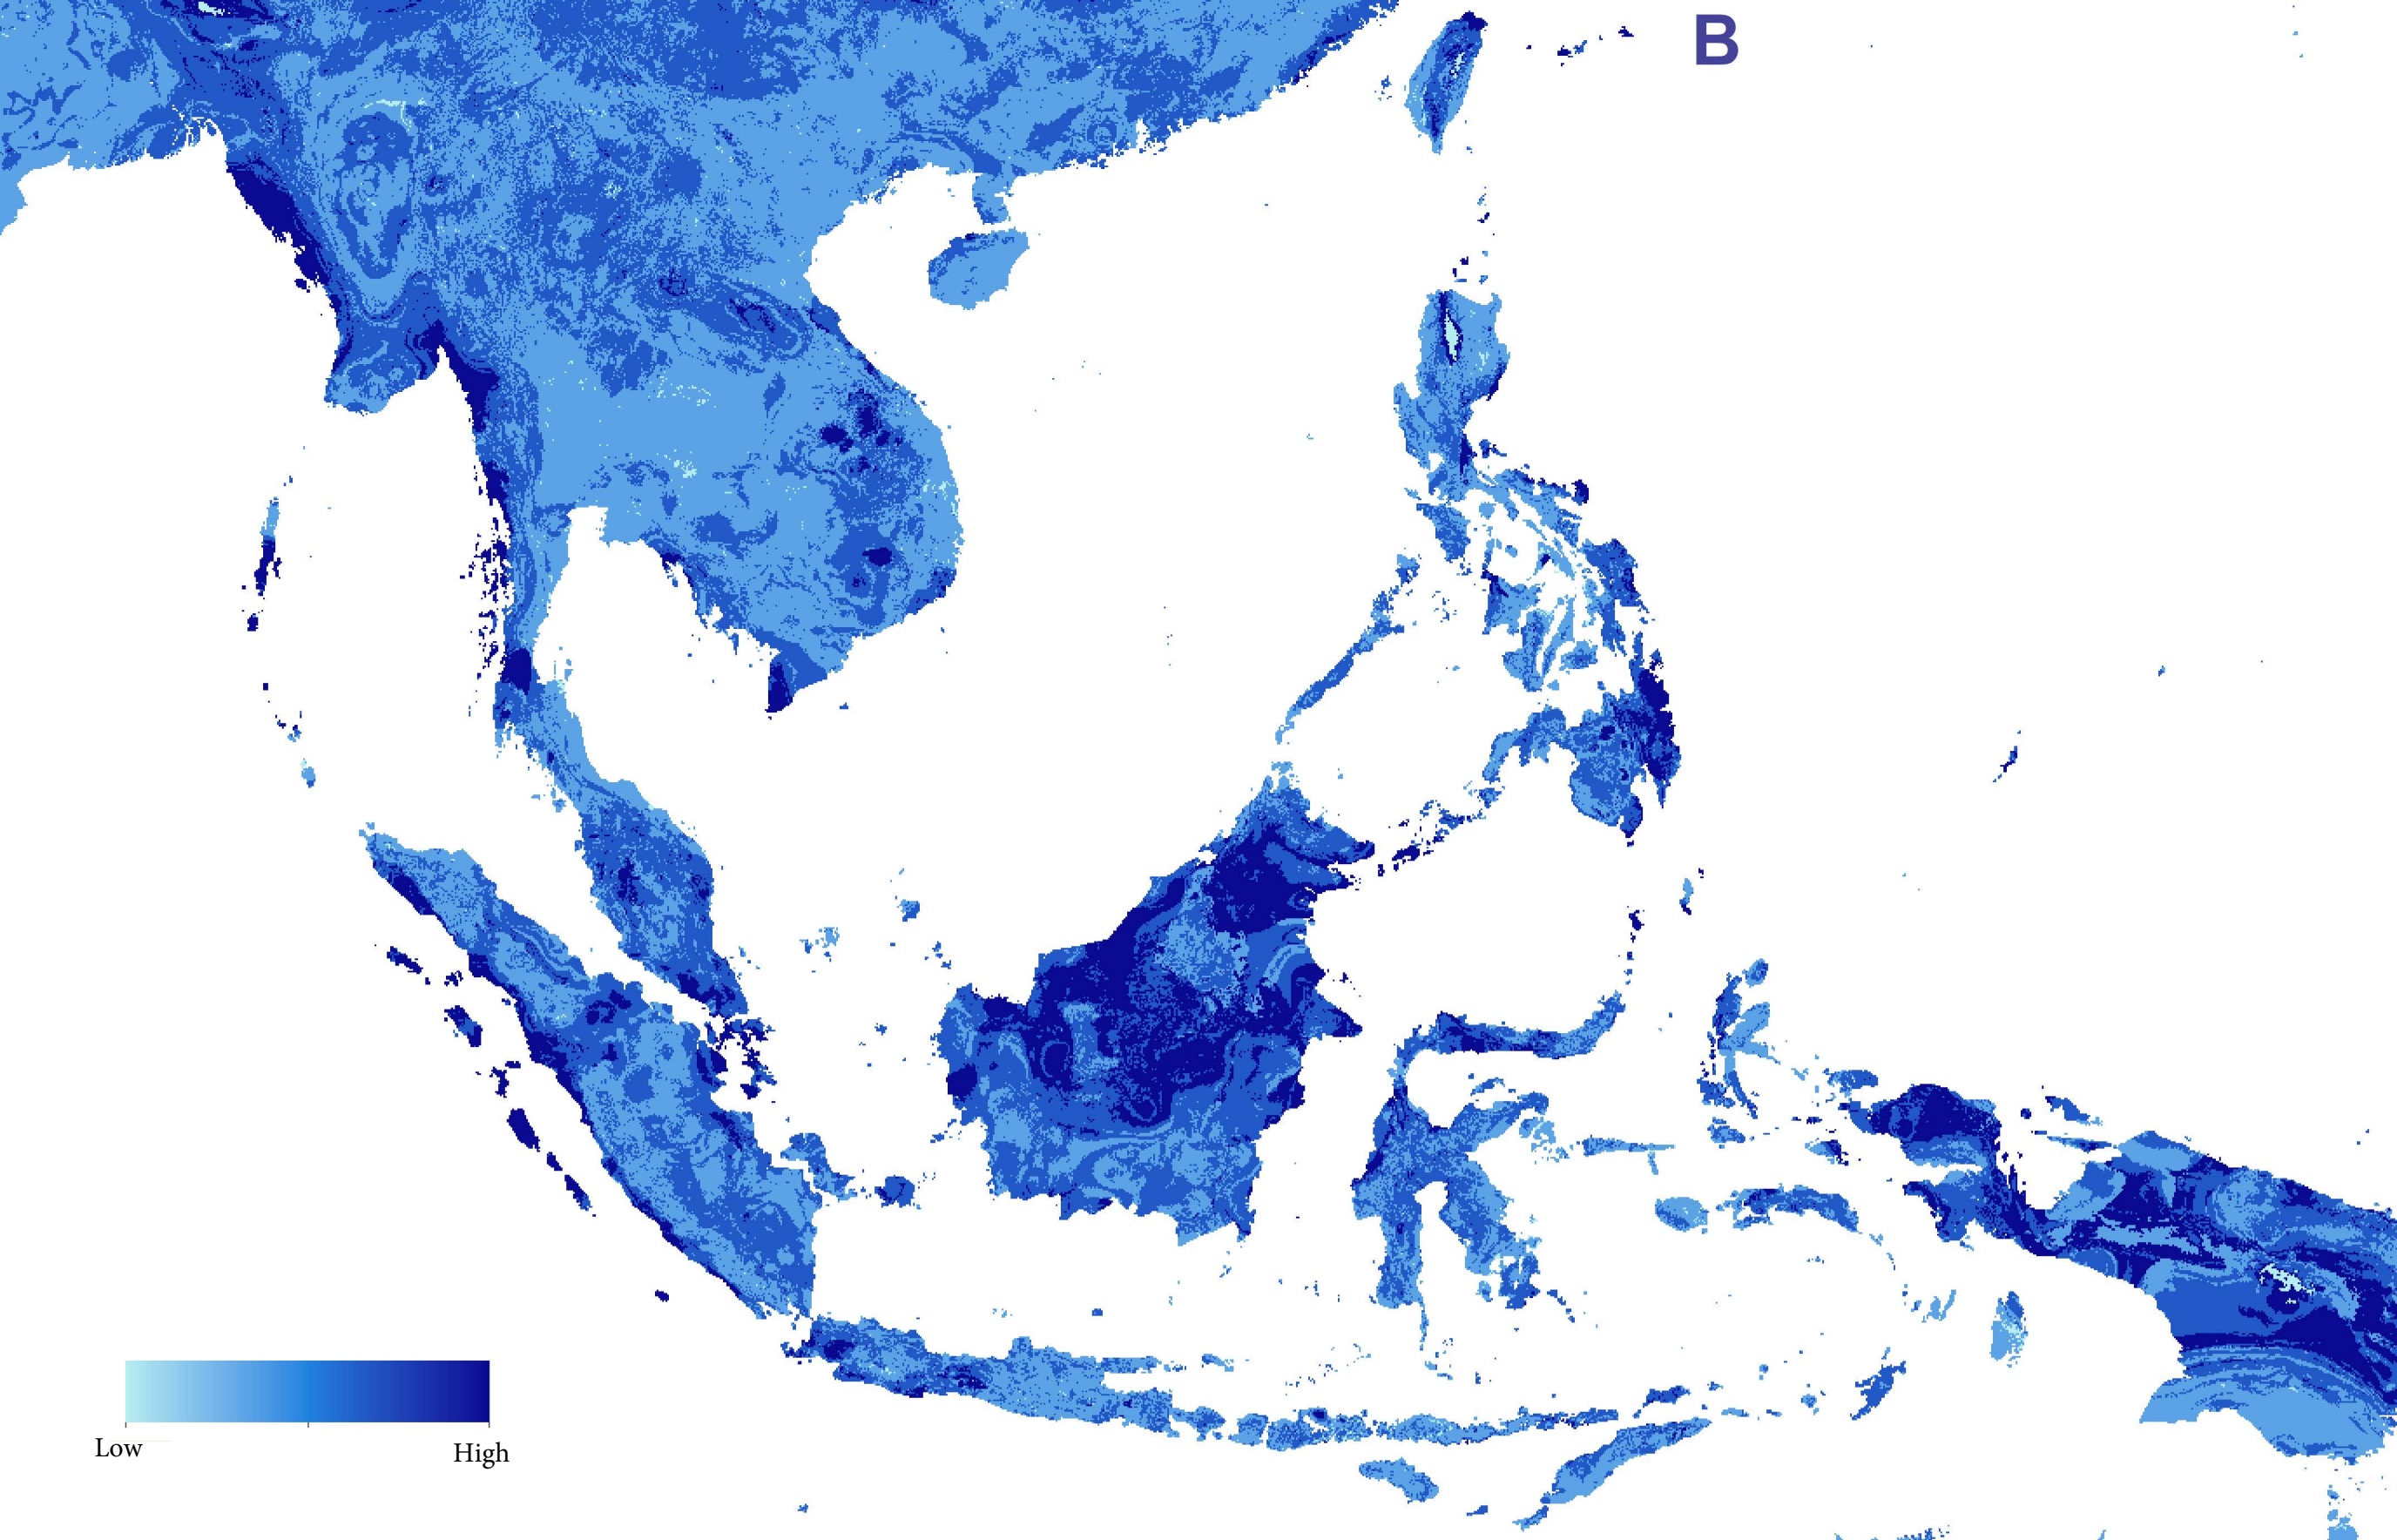

**B**

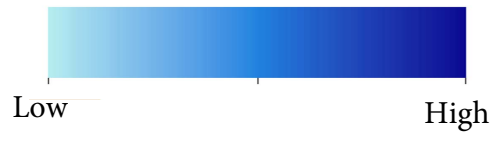



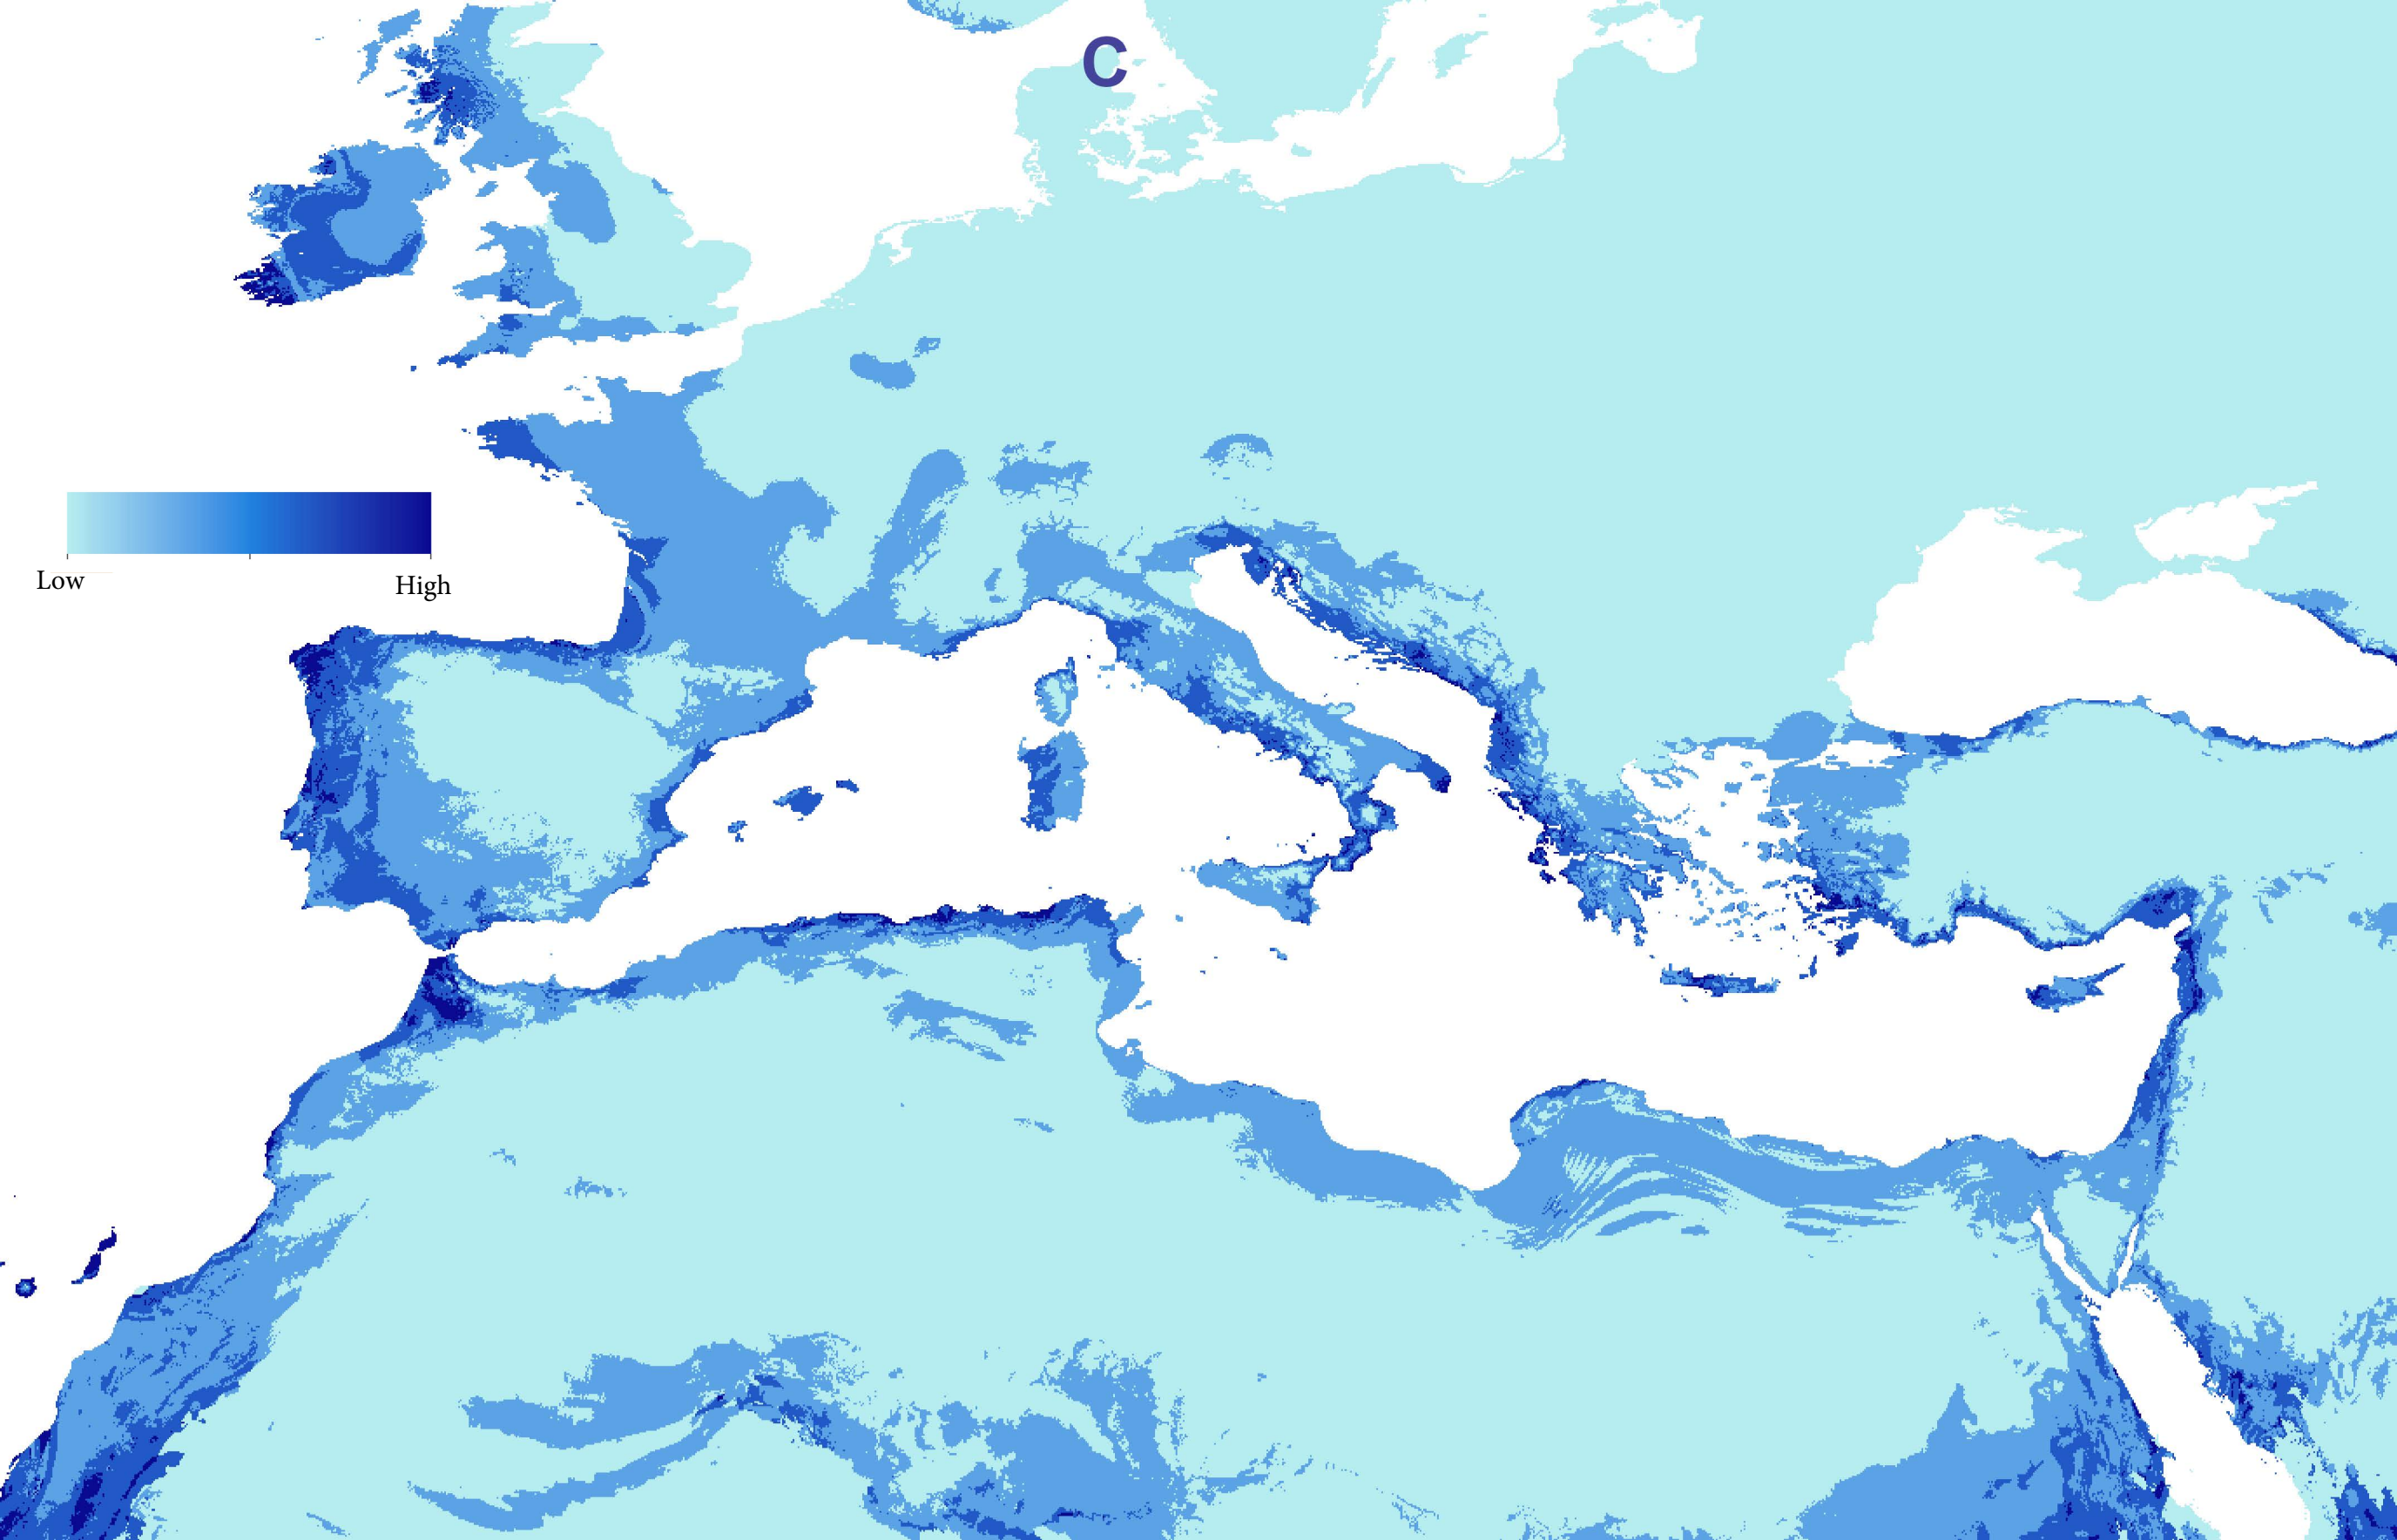



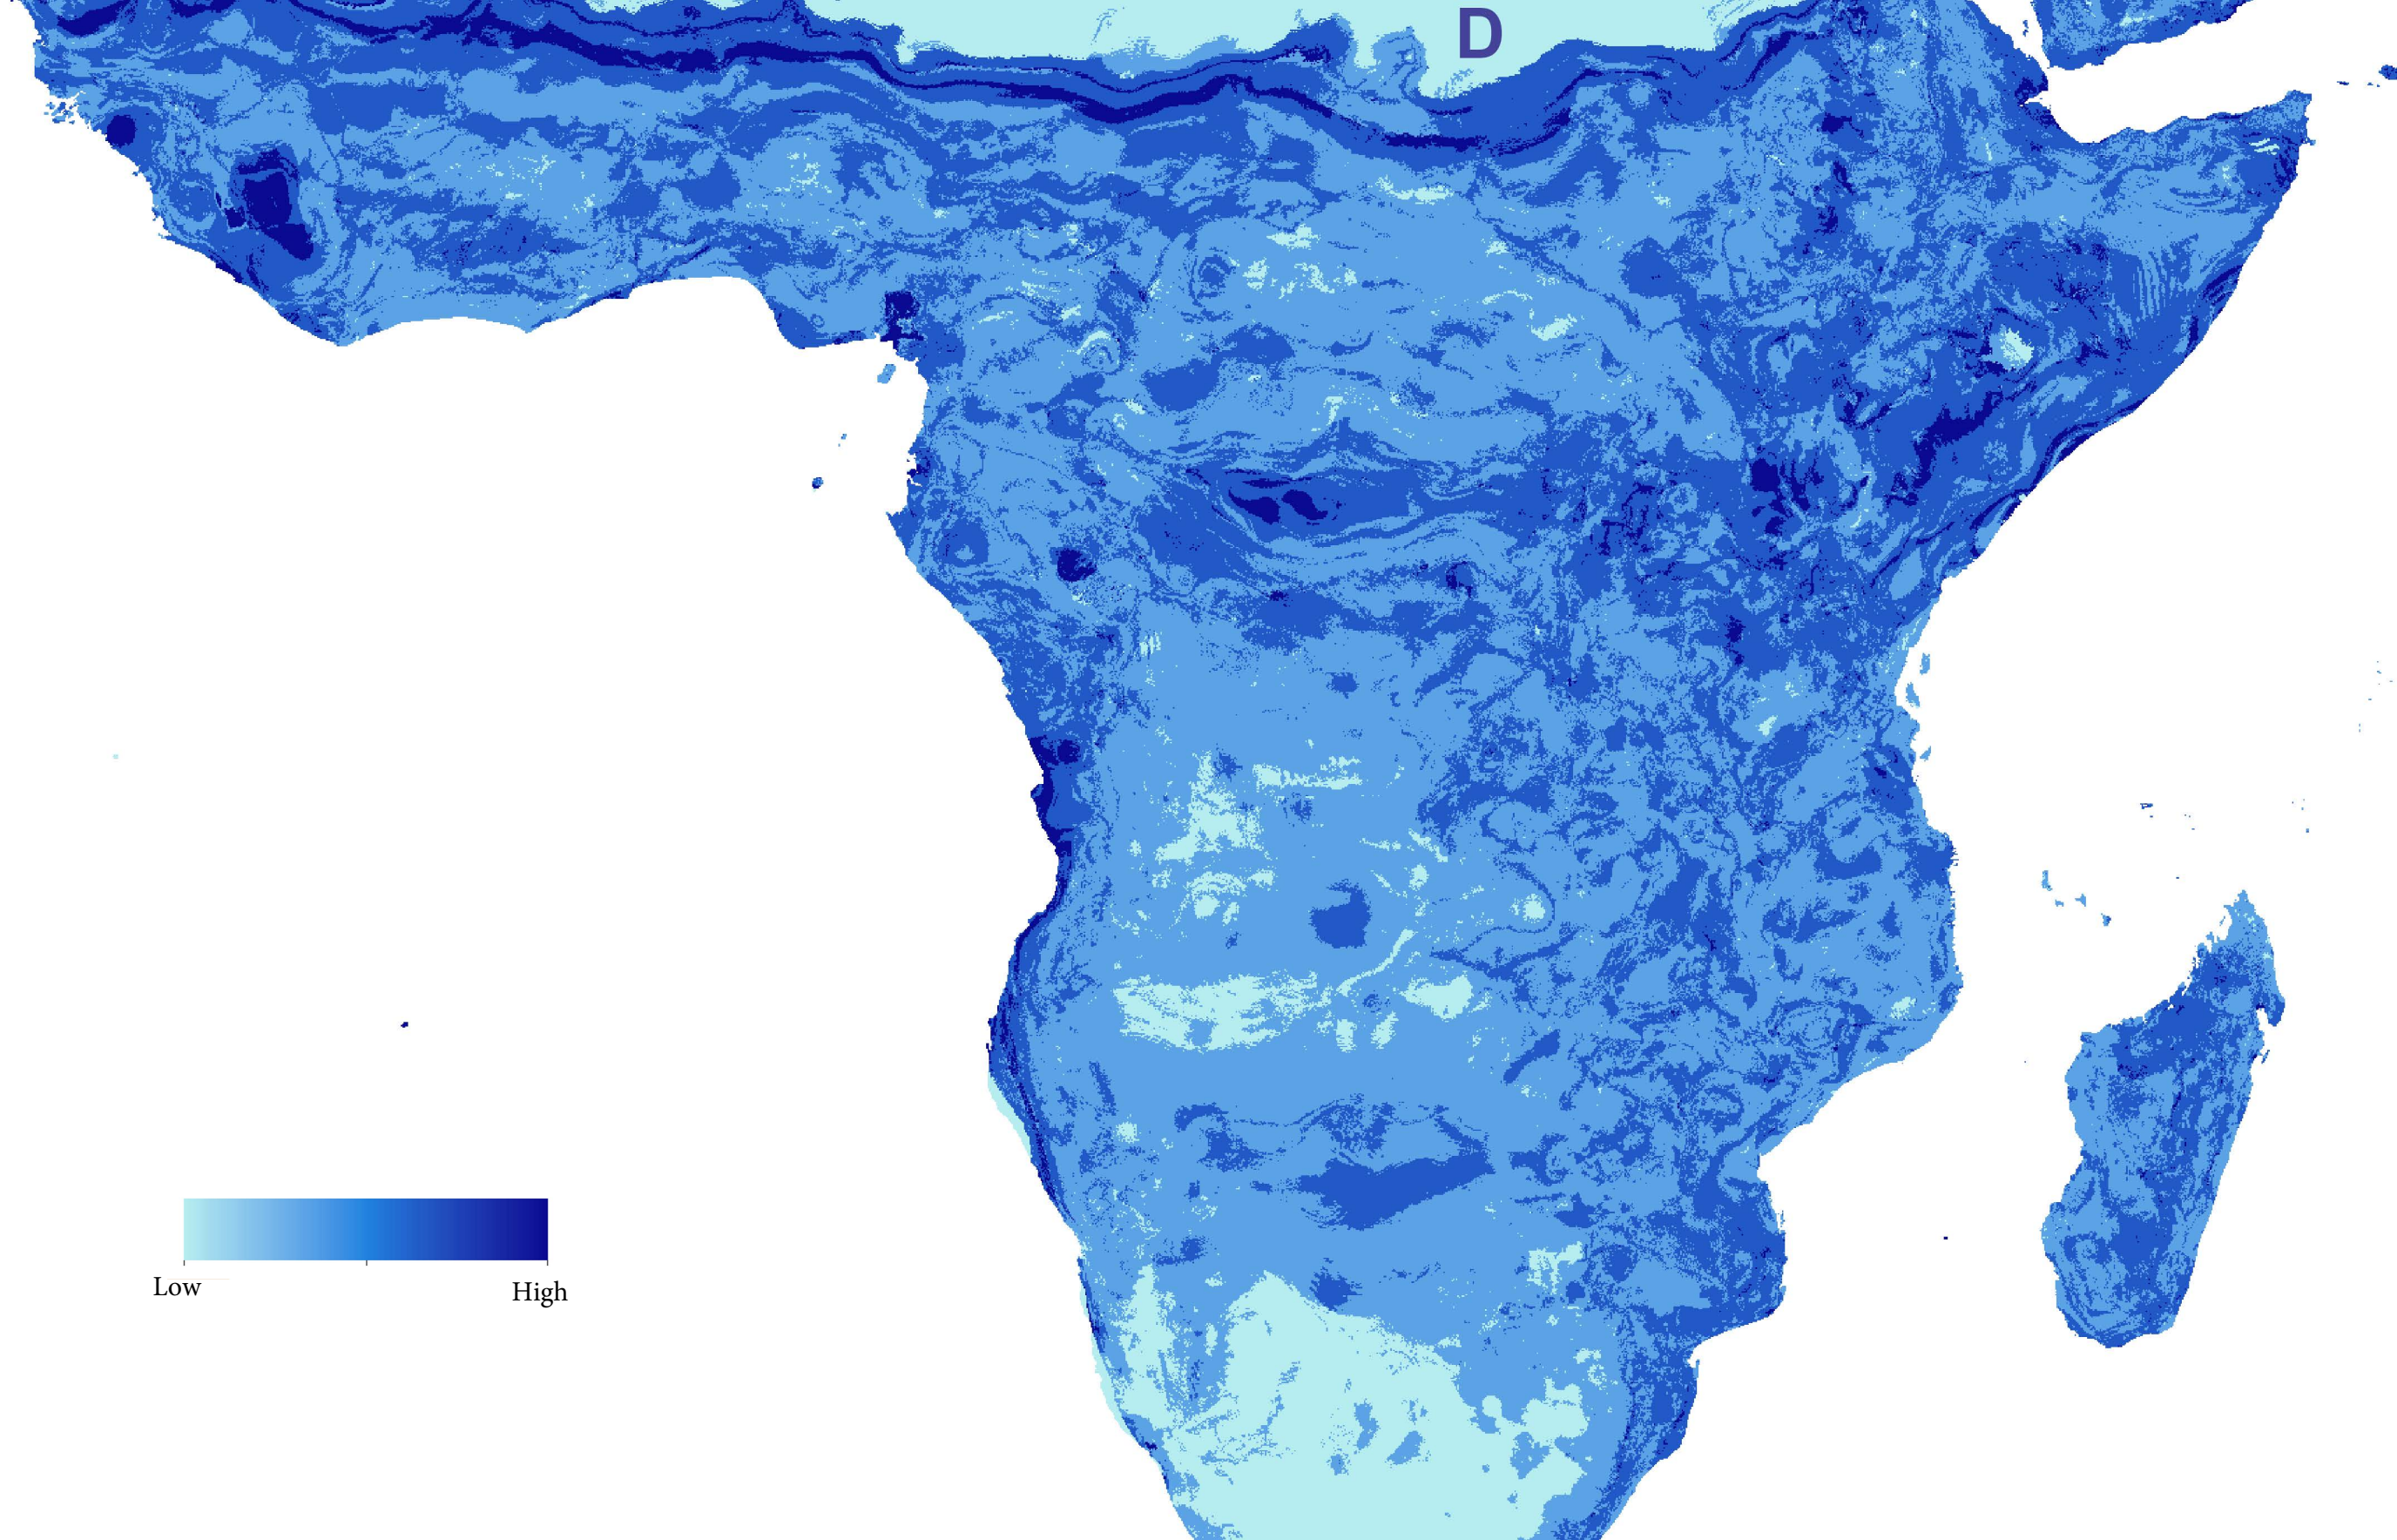

D

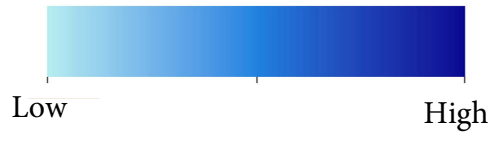

Low

High



E

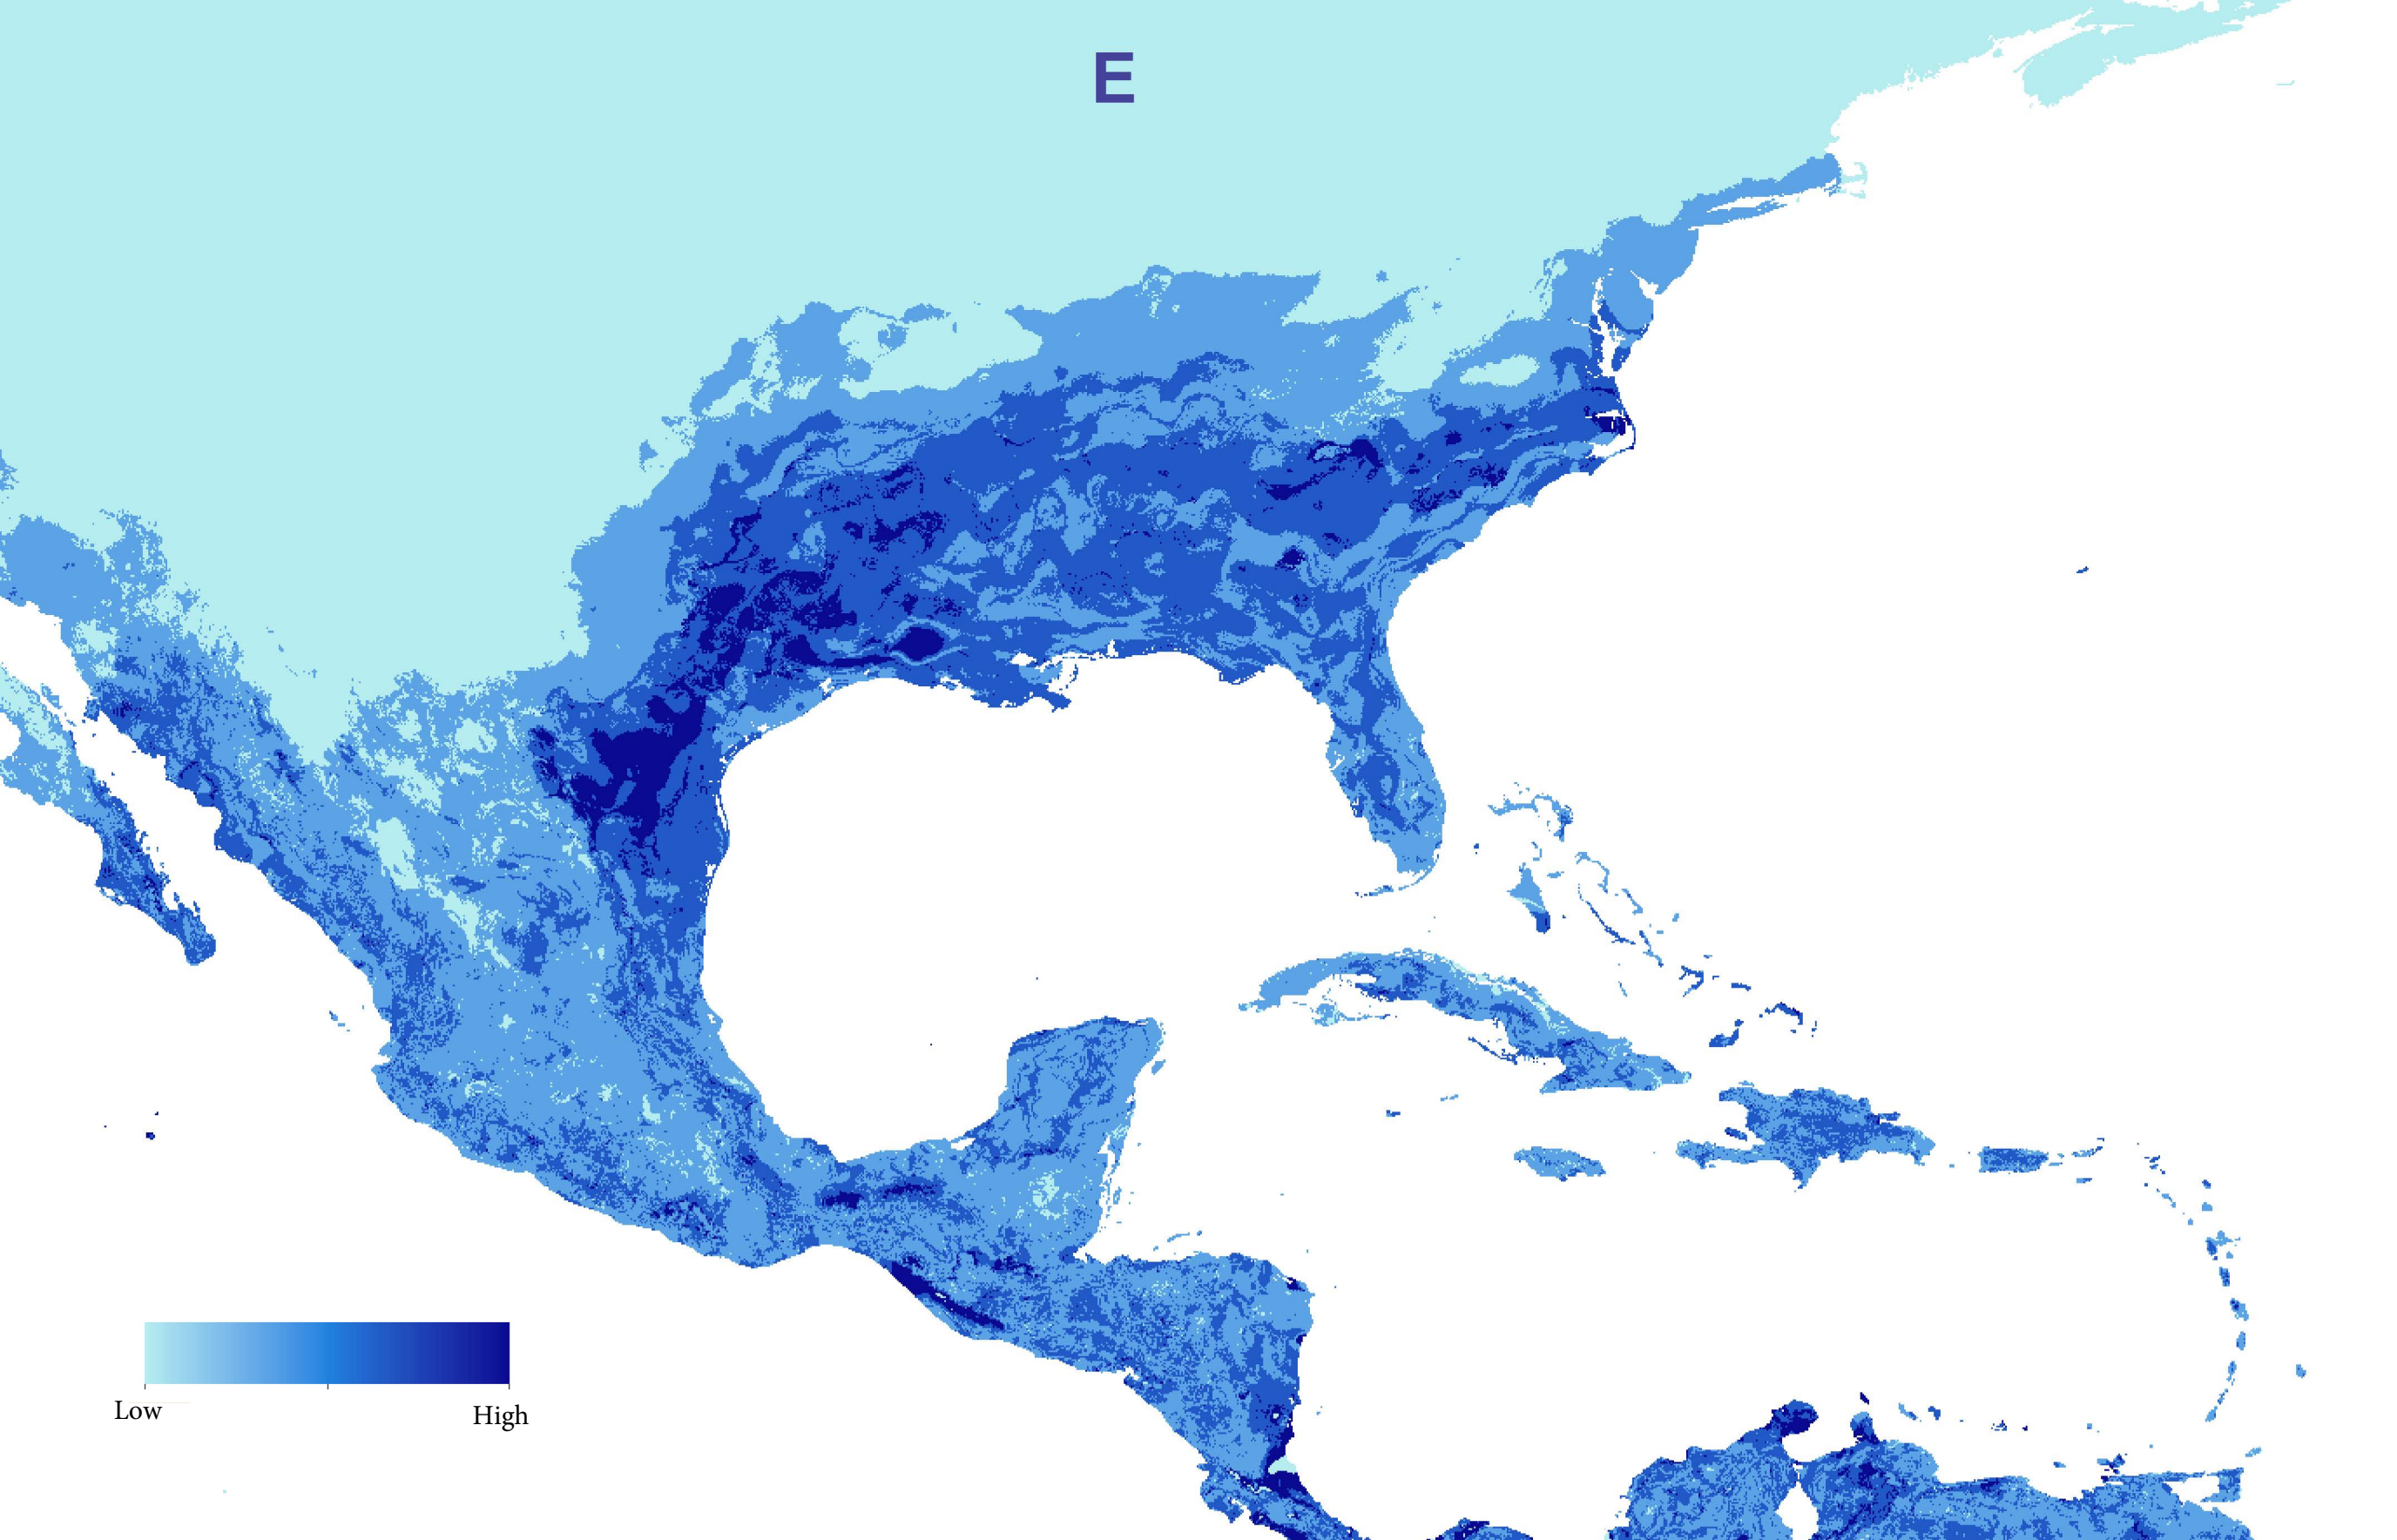

Low

High



F

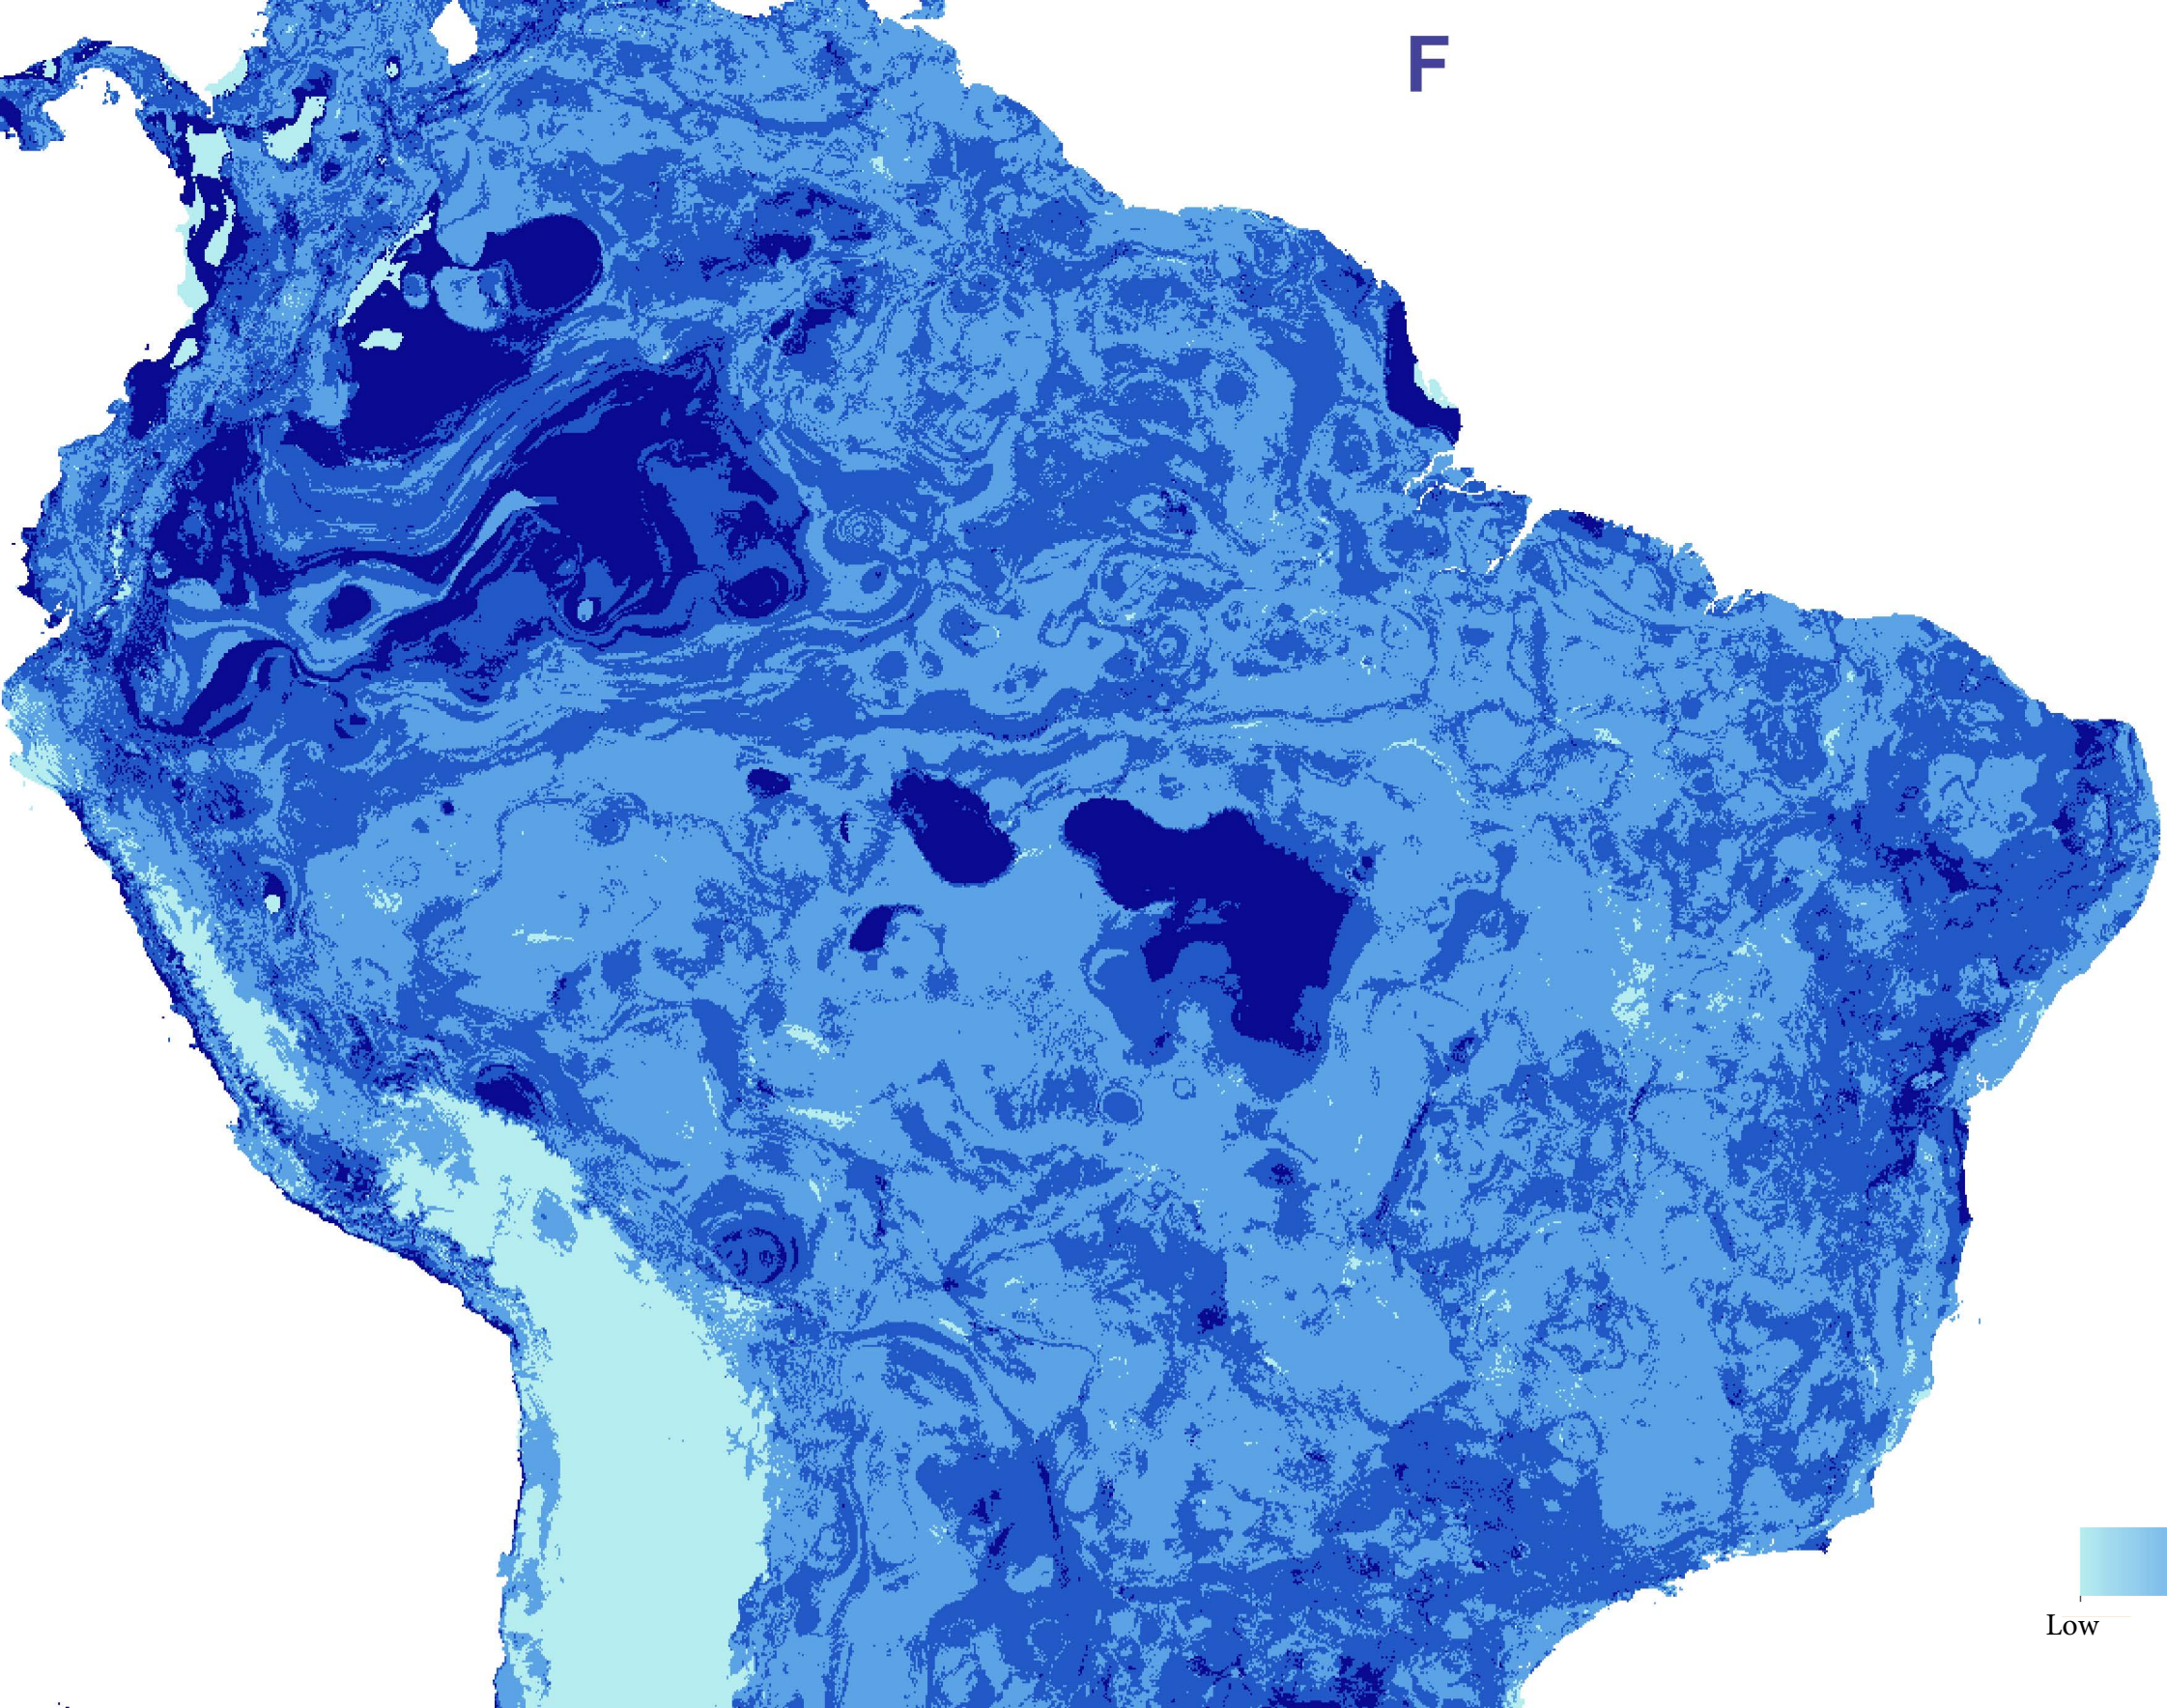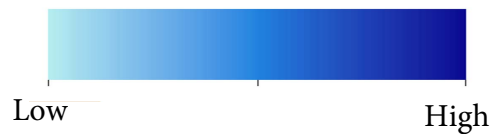

II. Visualization of uncertainty estimate associated with present-day predictions of *Aedes albopictus*. Uncertainty index was derived from diverse sets of occurrence in M<sub>AXENT</sub> samples; uncertainty index was estimated from the range (maximum—minimum) of predictions in 10 replicate runs in M<sub>AXENT</sub>.

- A) Global uncertainty map
- B) Close-up to South Asia showing the diverse values of uncertainty index.
- C) Close-up to Europe and North Africa showing the diverse values of uncertainty index.
- D) Close-up to Sub-Saharan Africa showing the diverse values of uncertainty index.
- E) Close-up to North America showing the diverse values of uncertainty index.
- F) Close-up to South America showing the diverse values of uncertainty index.



A

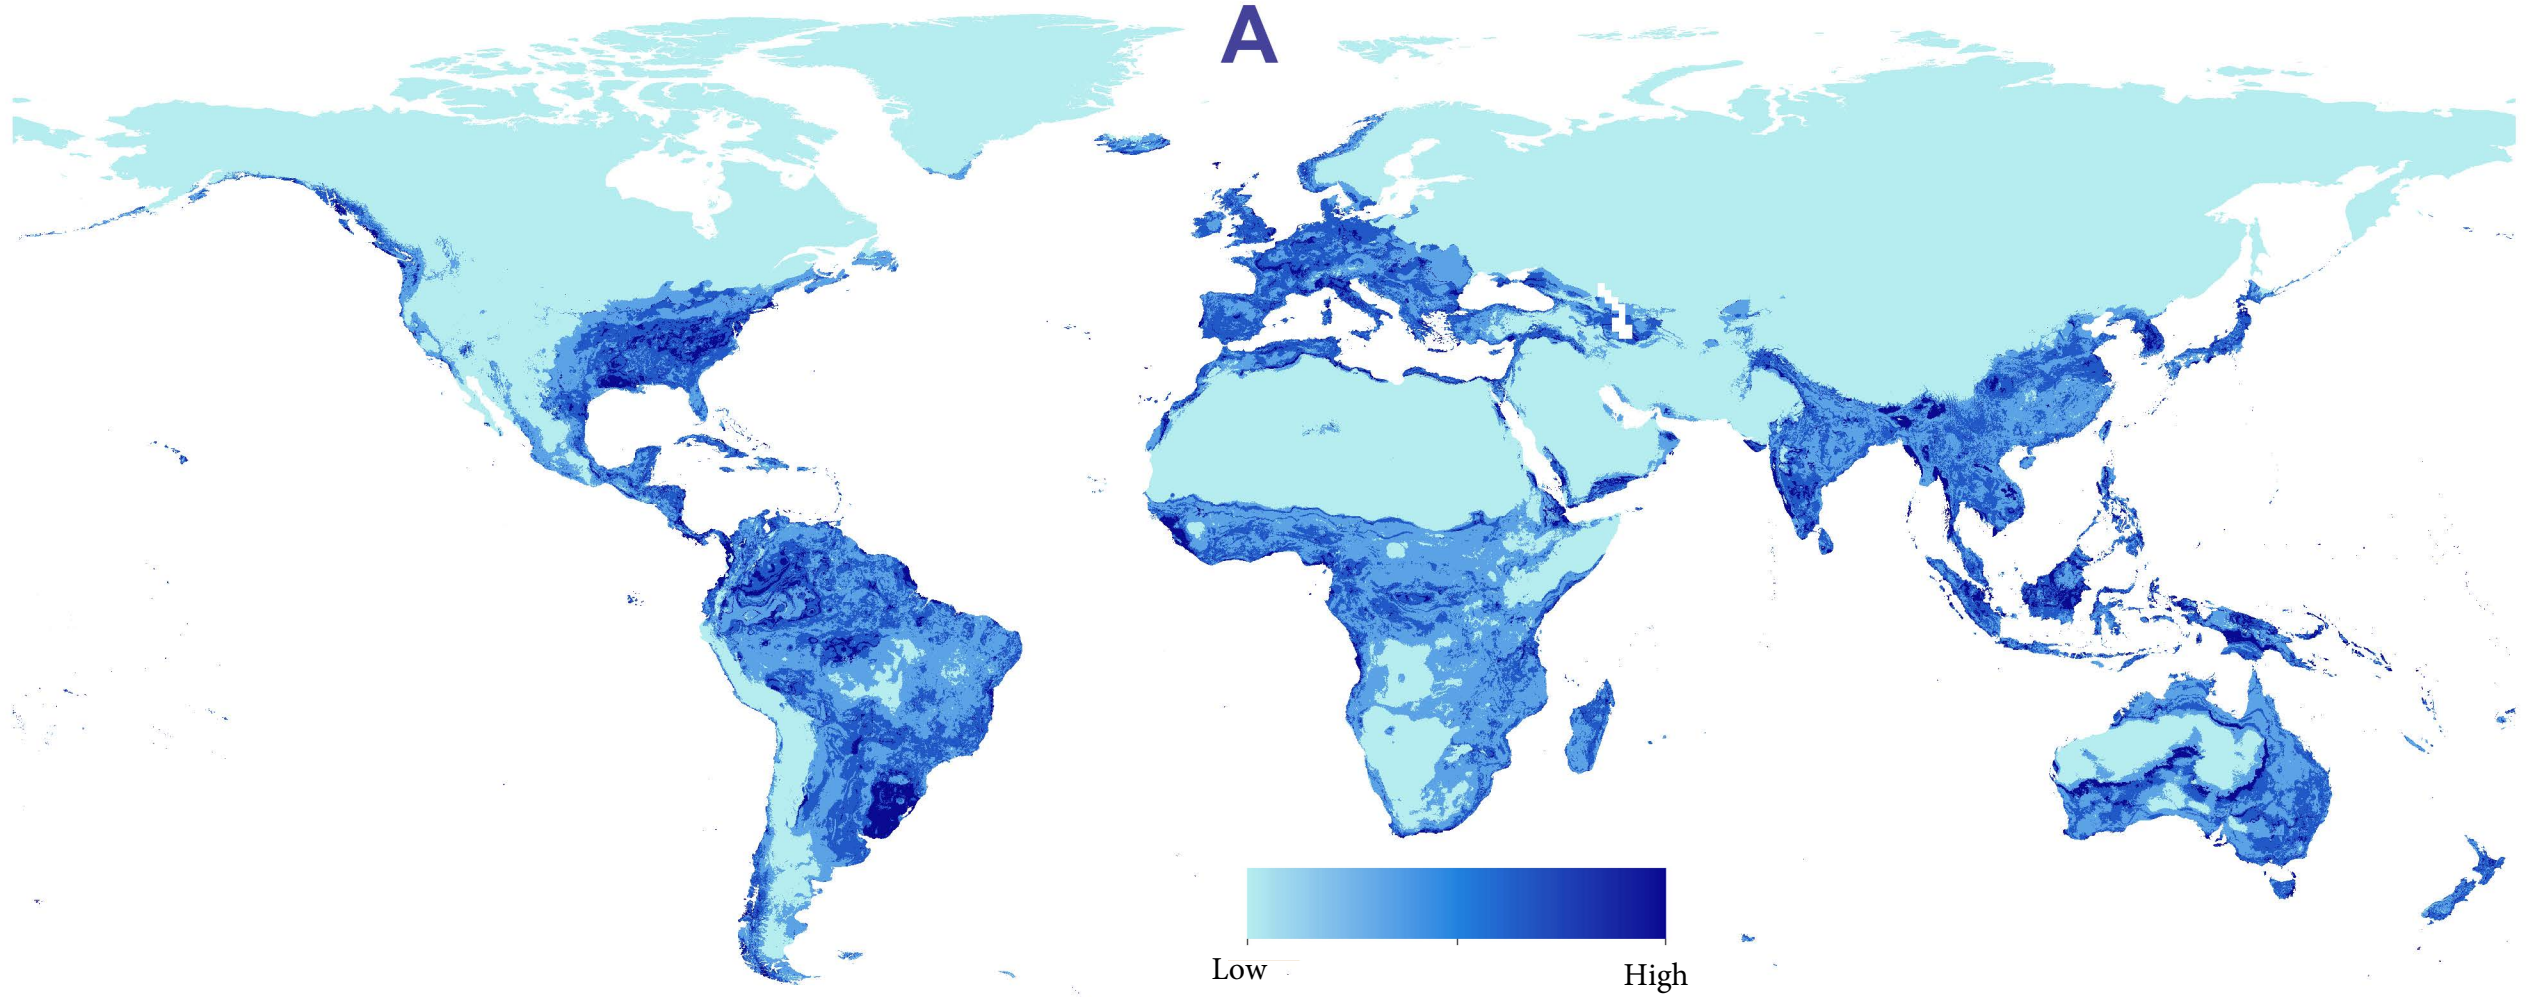

**B**

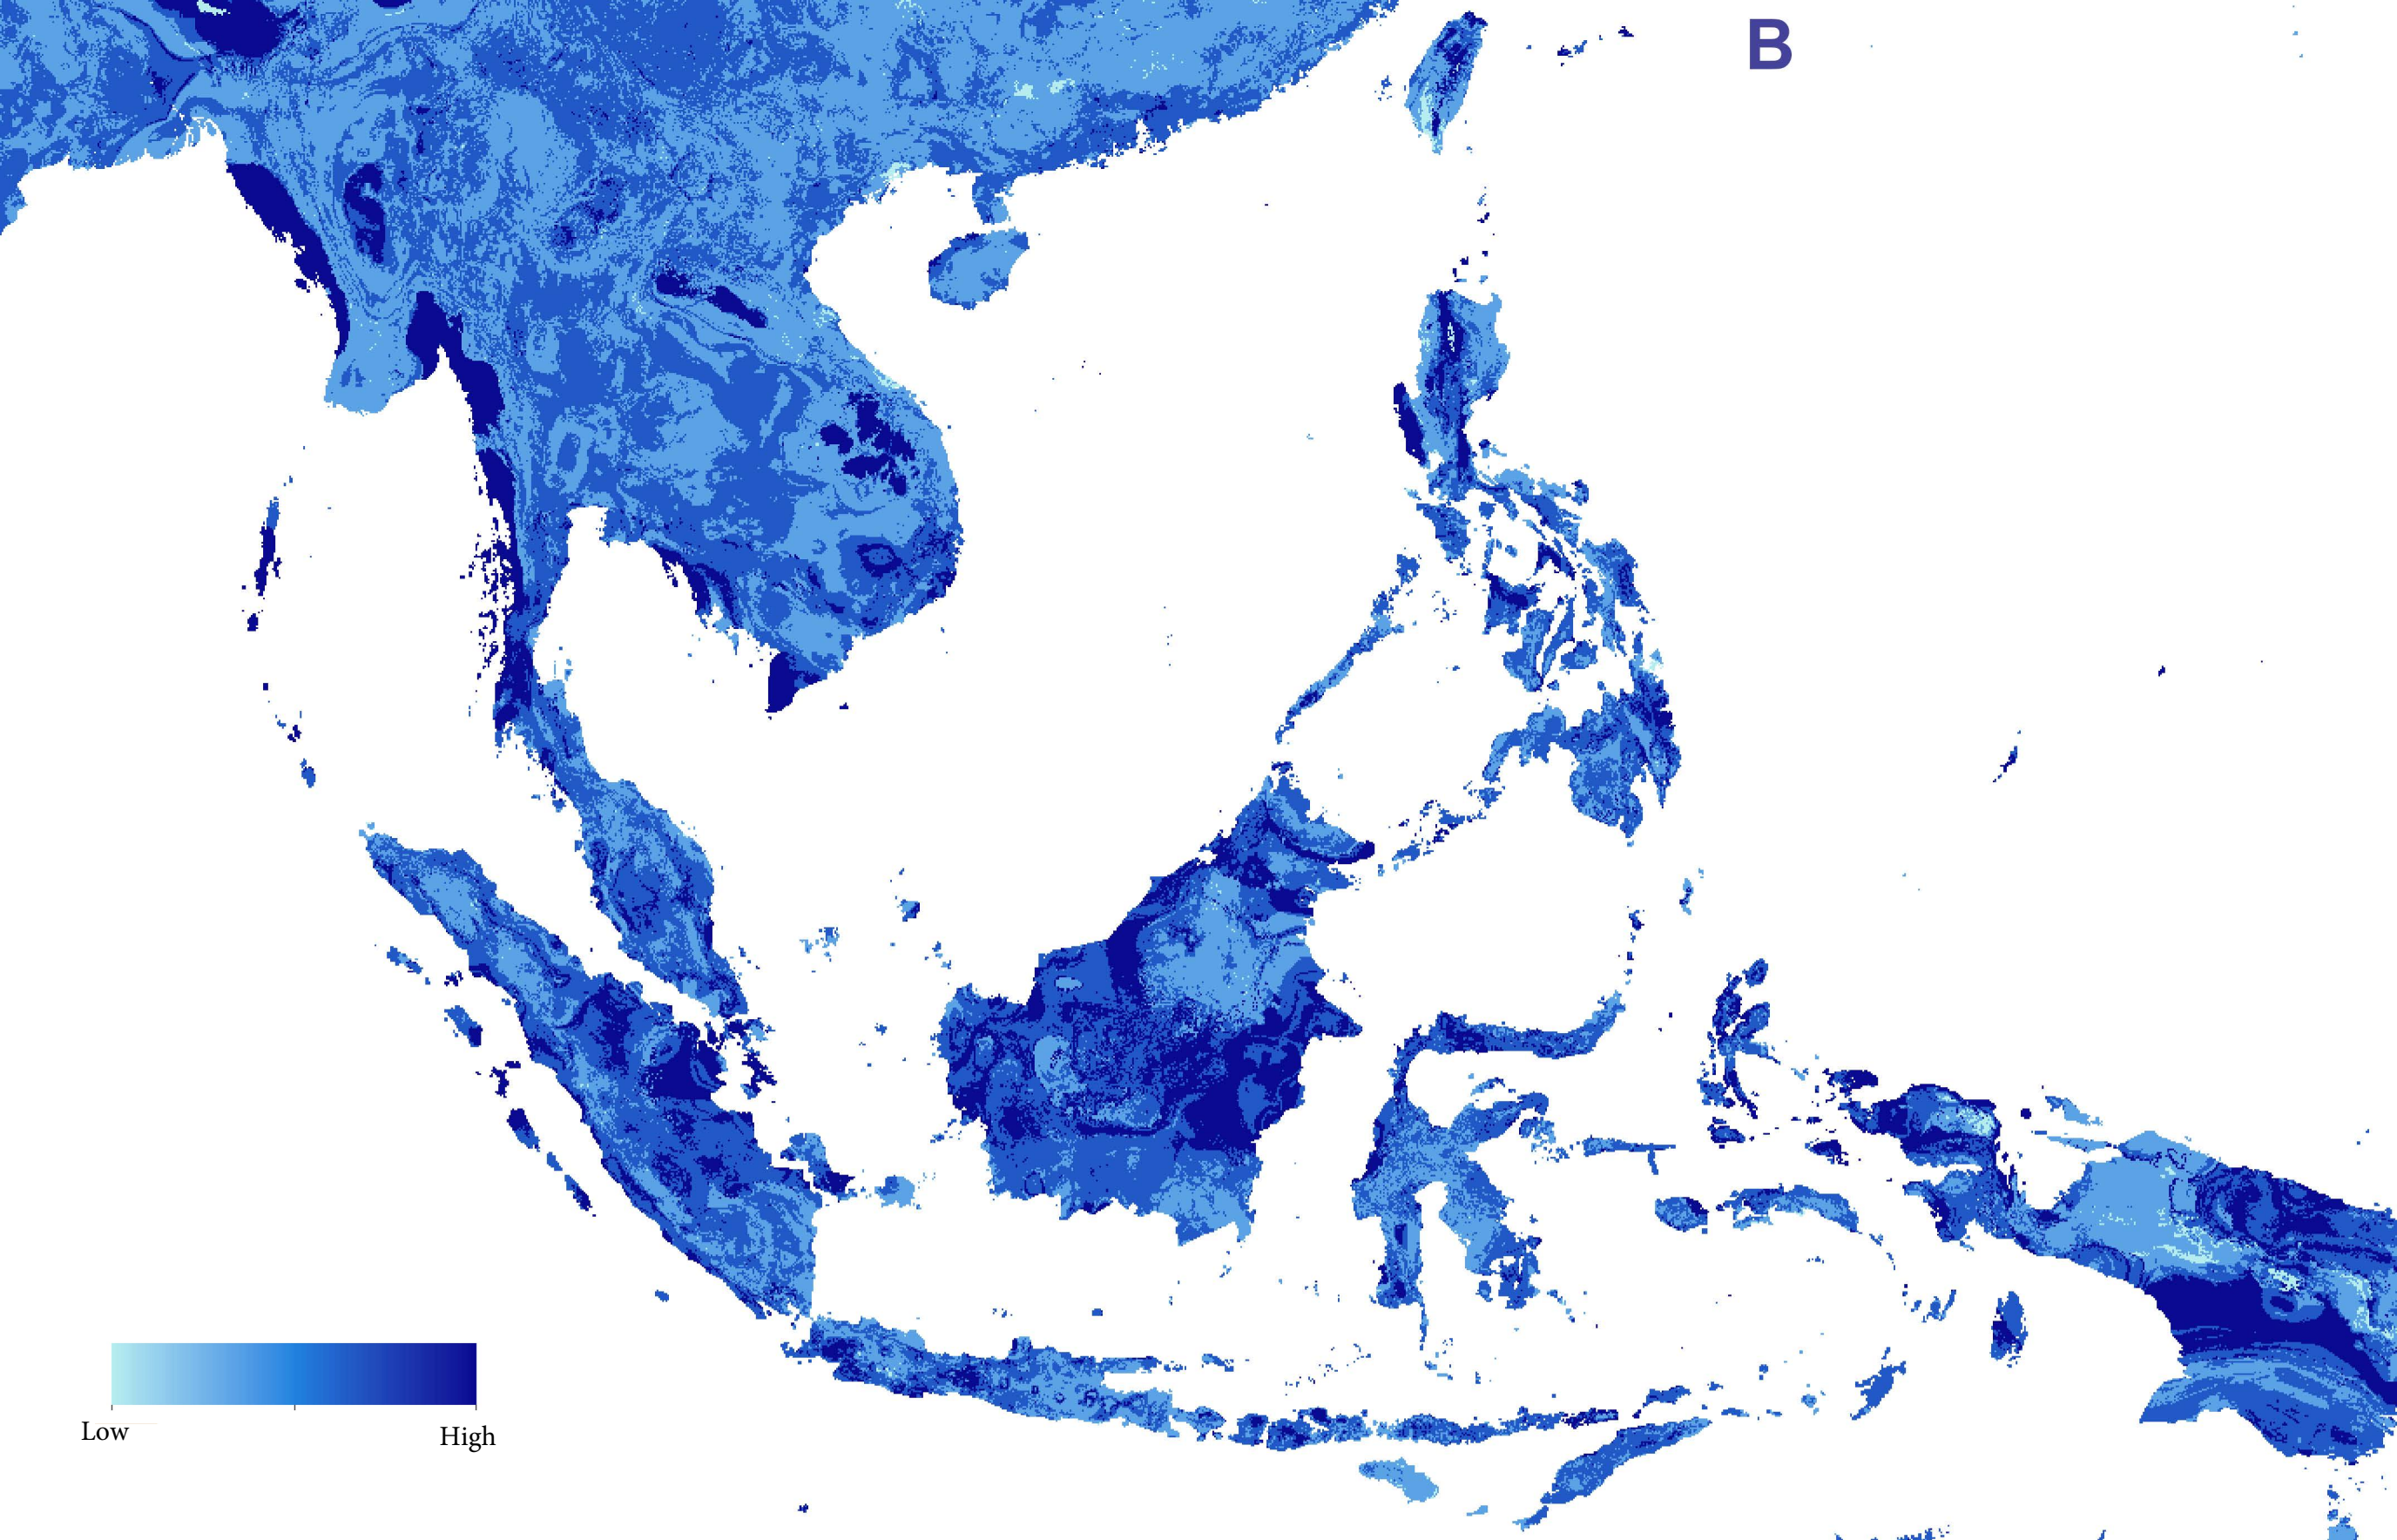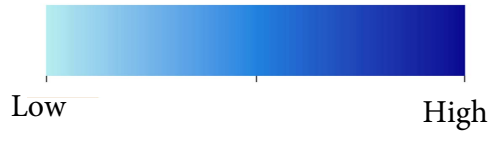



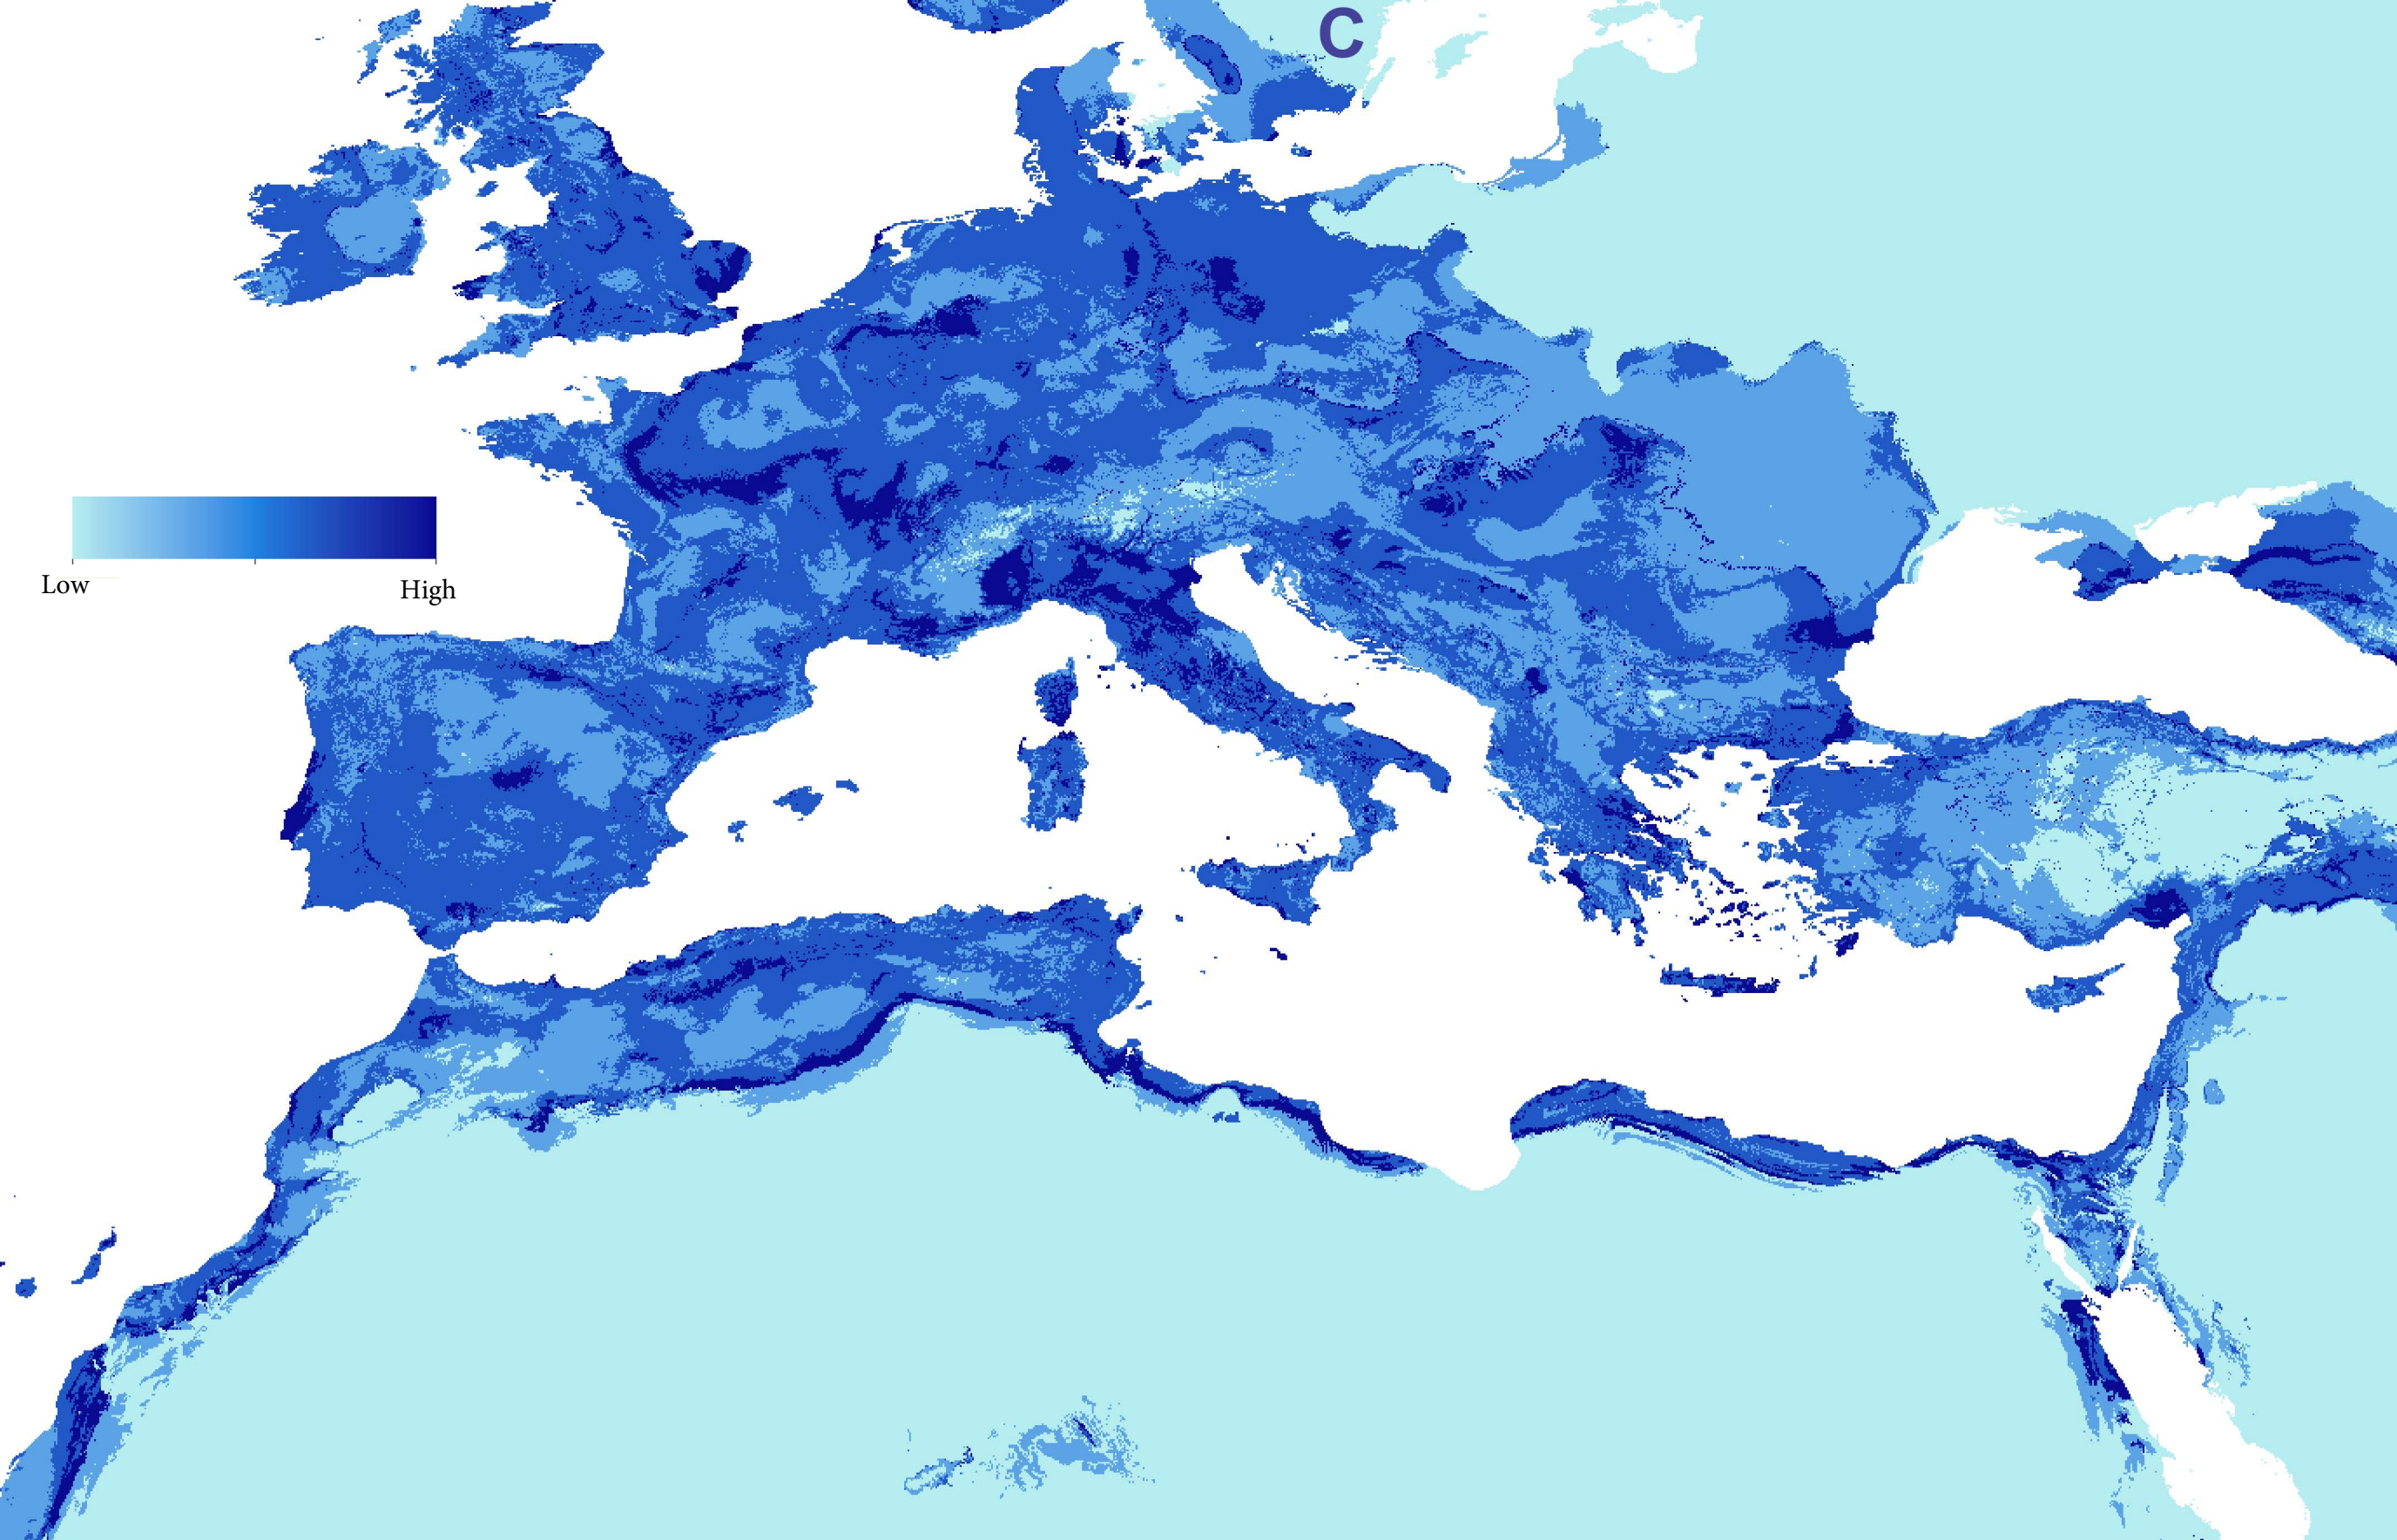



D

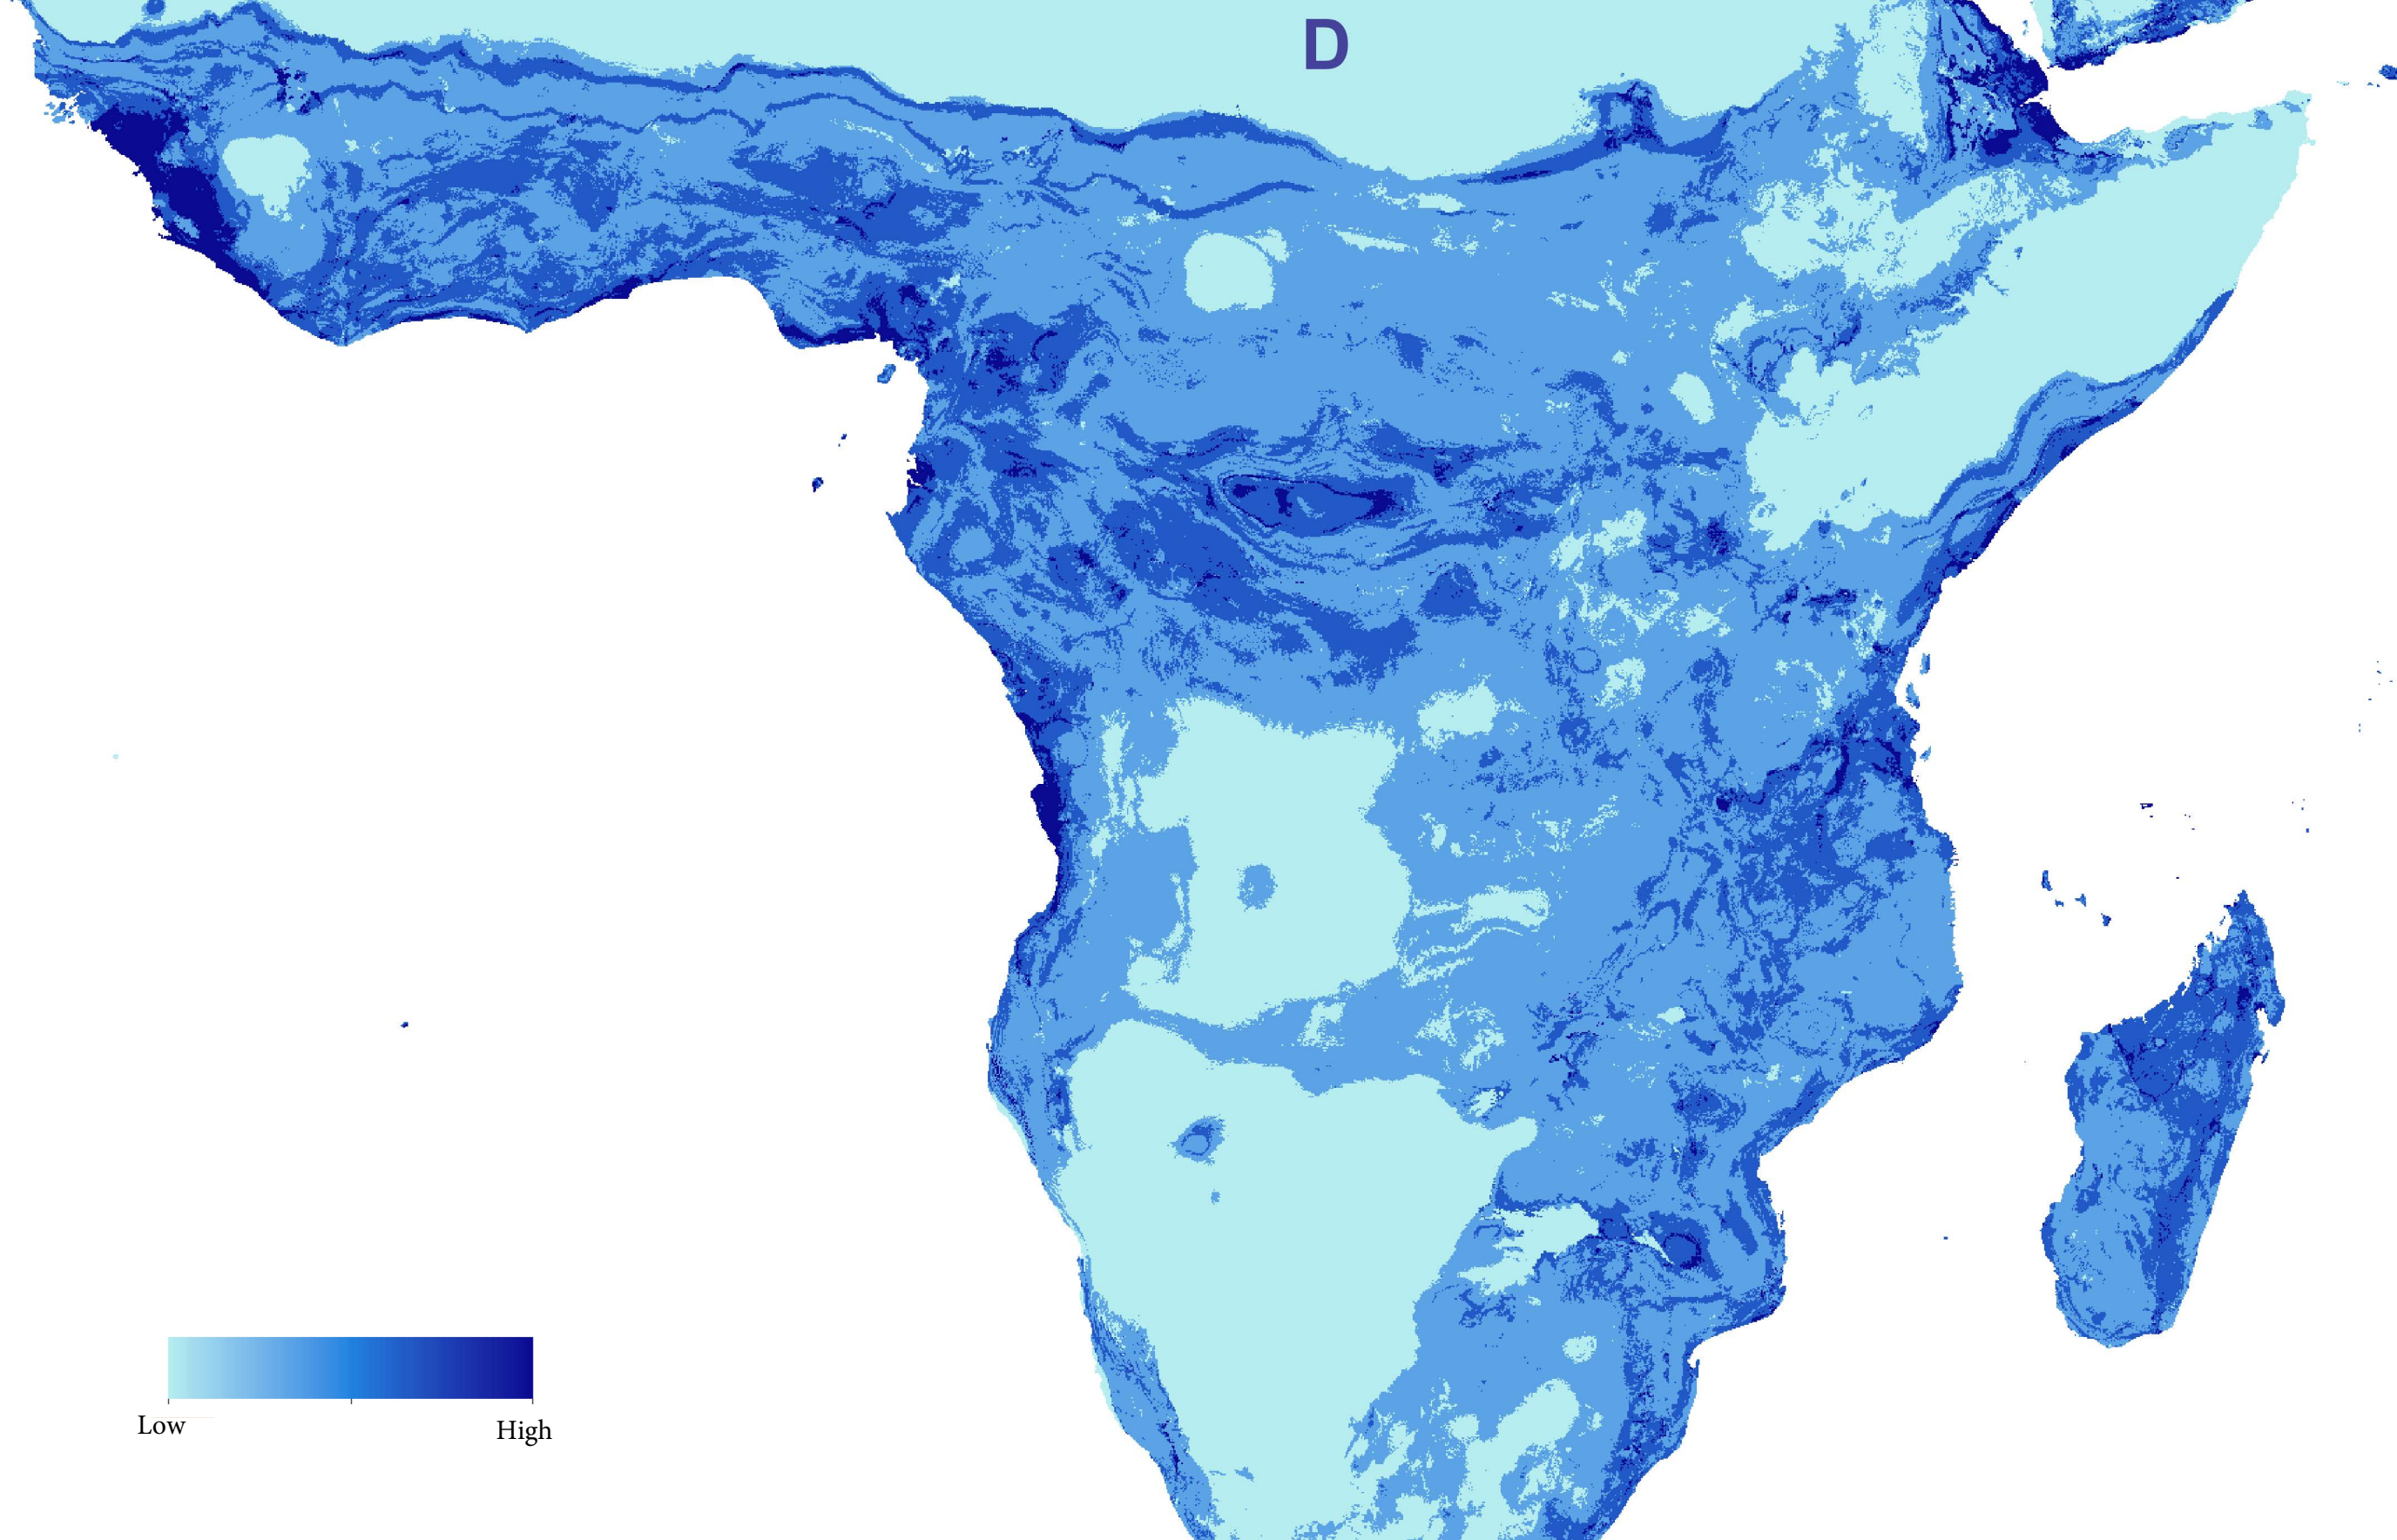

Low

High



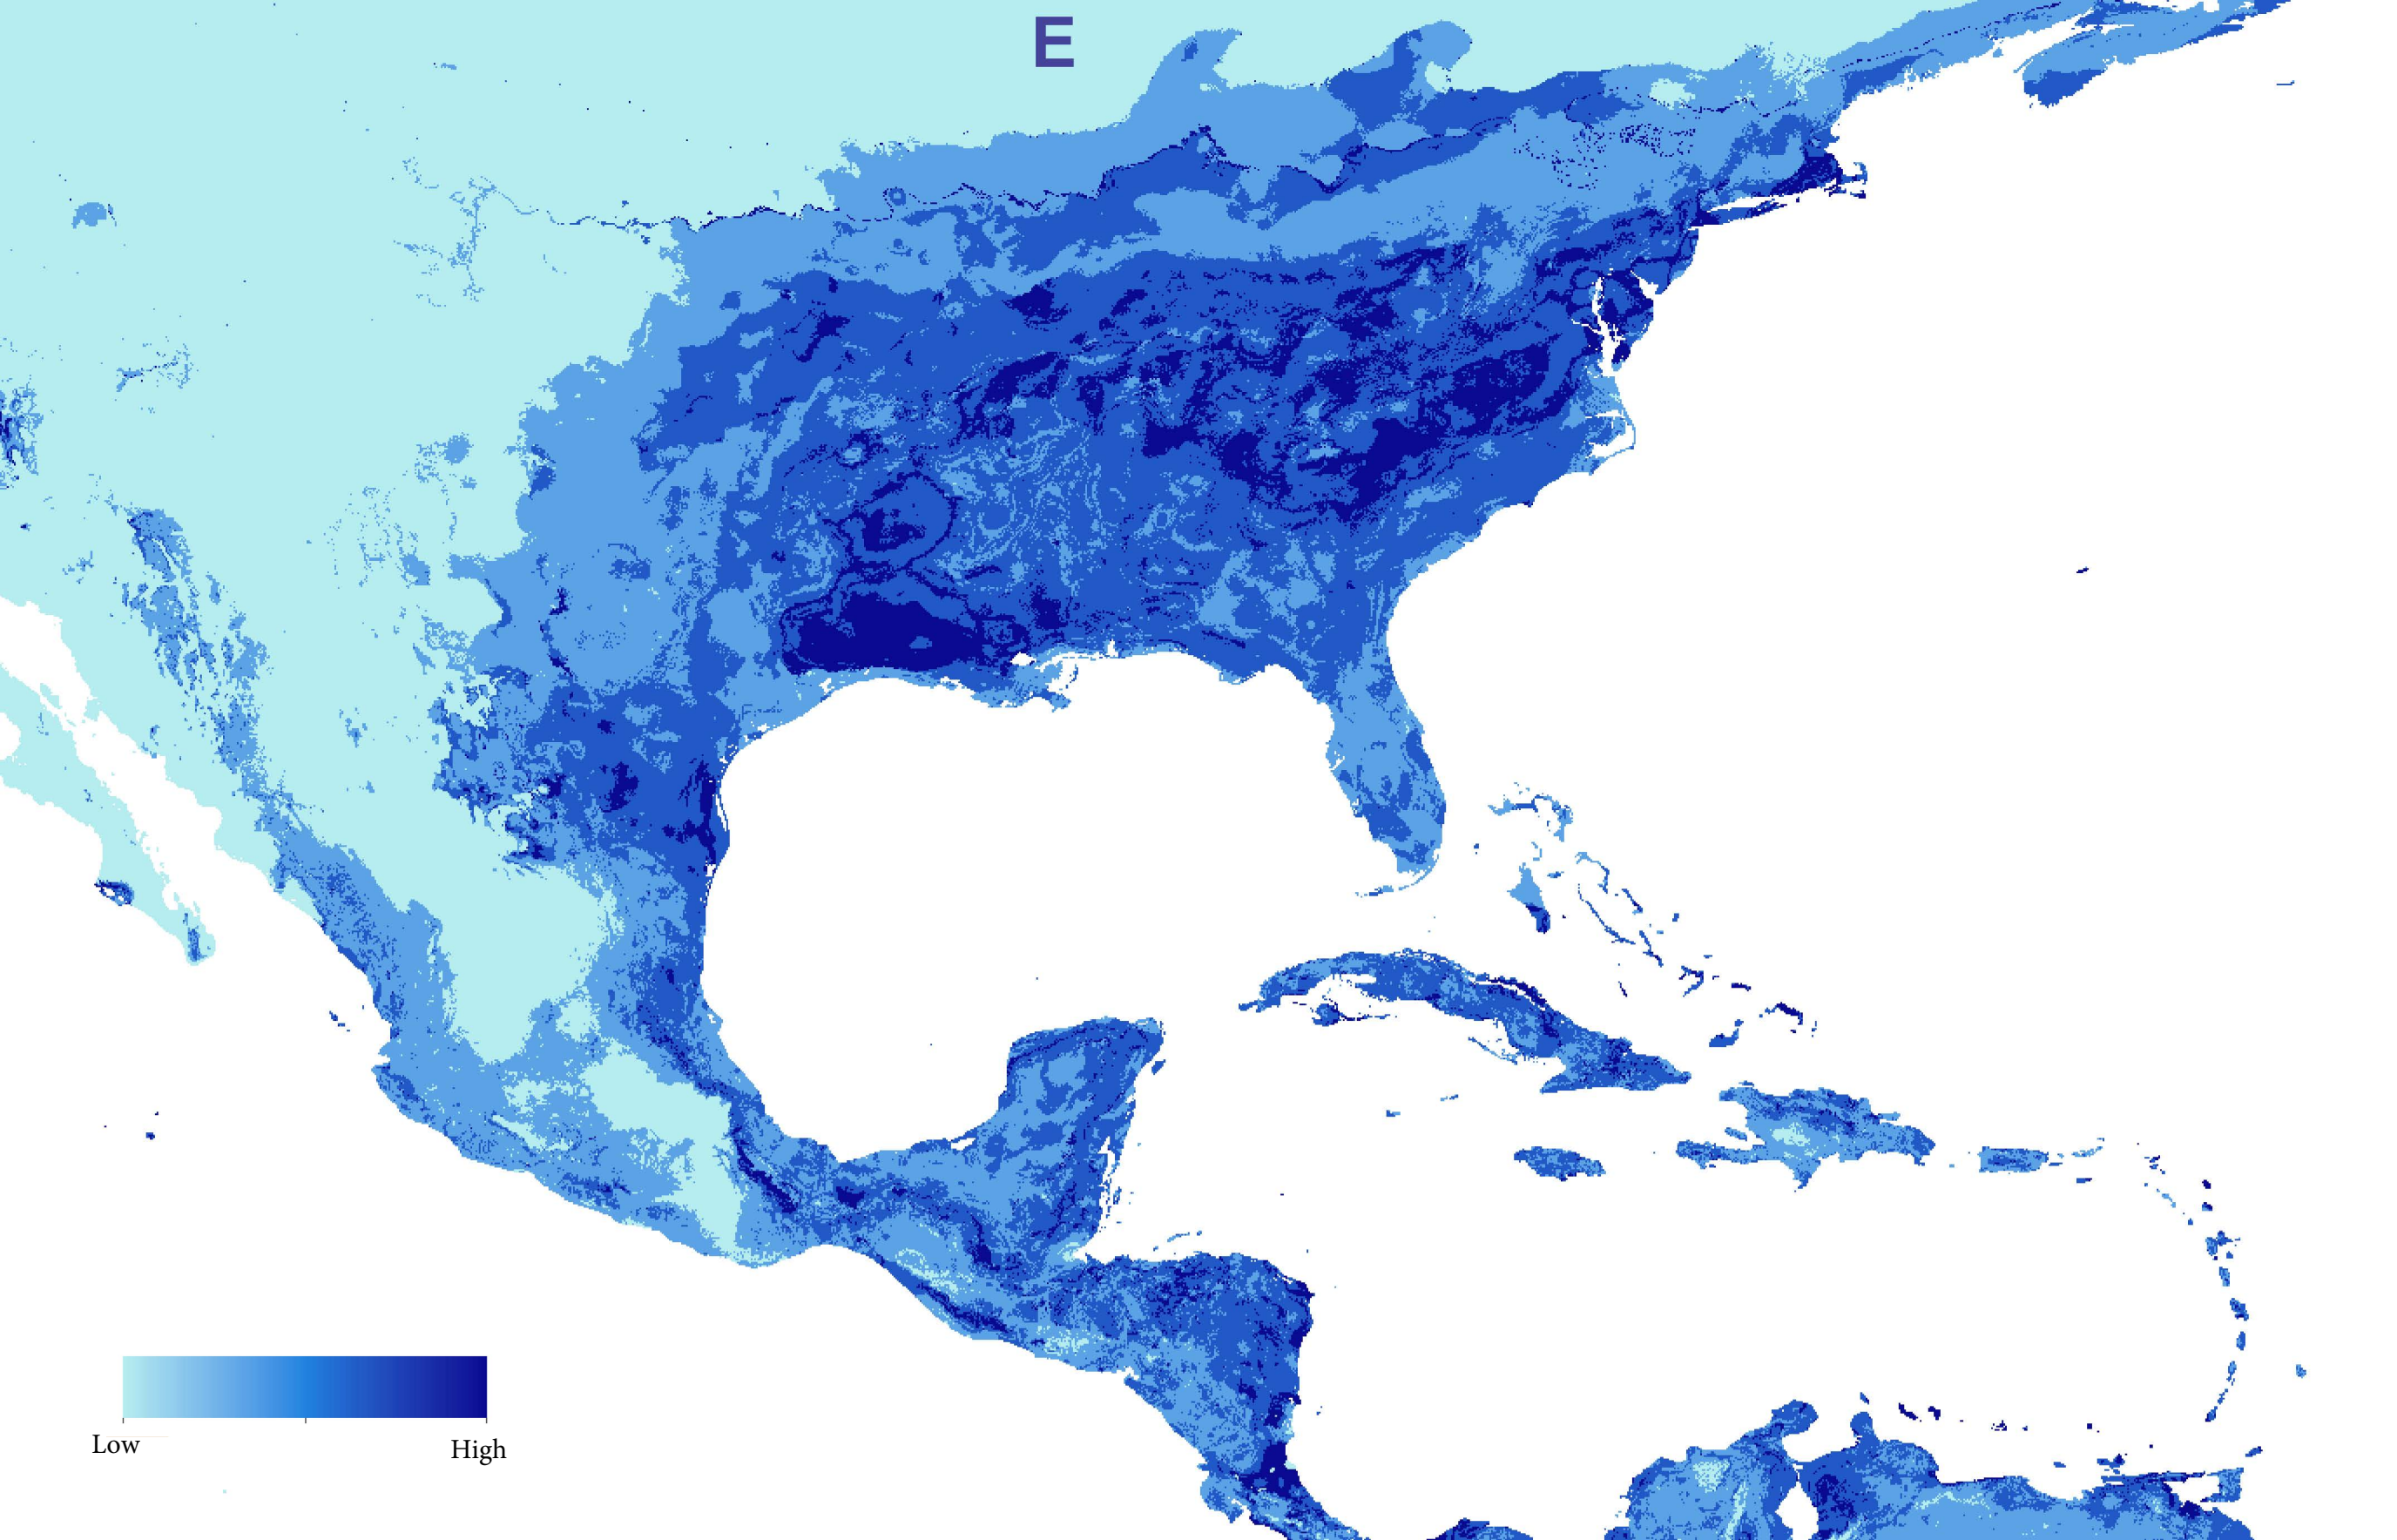

E

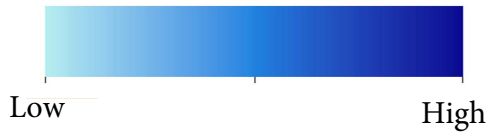



F

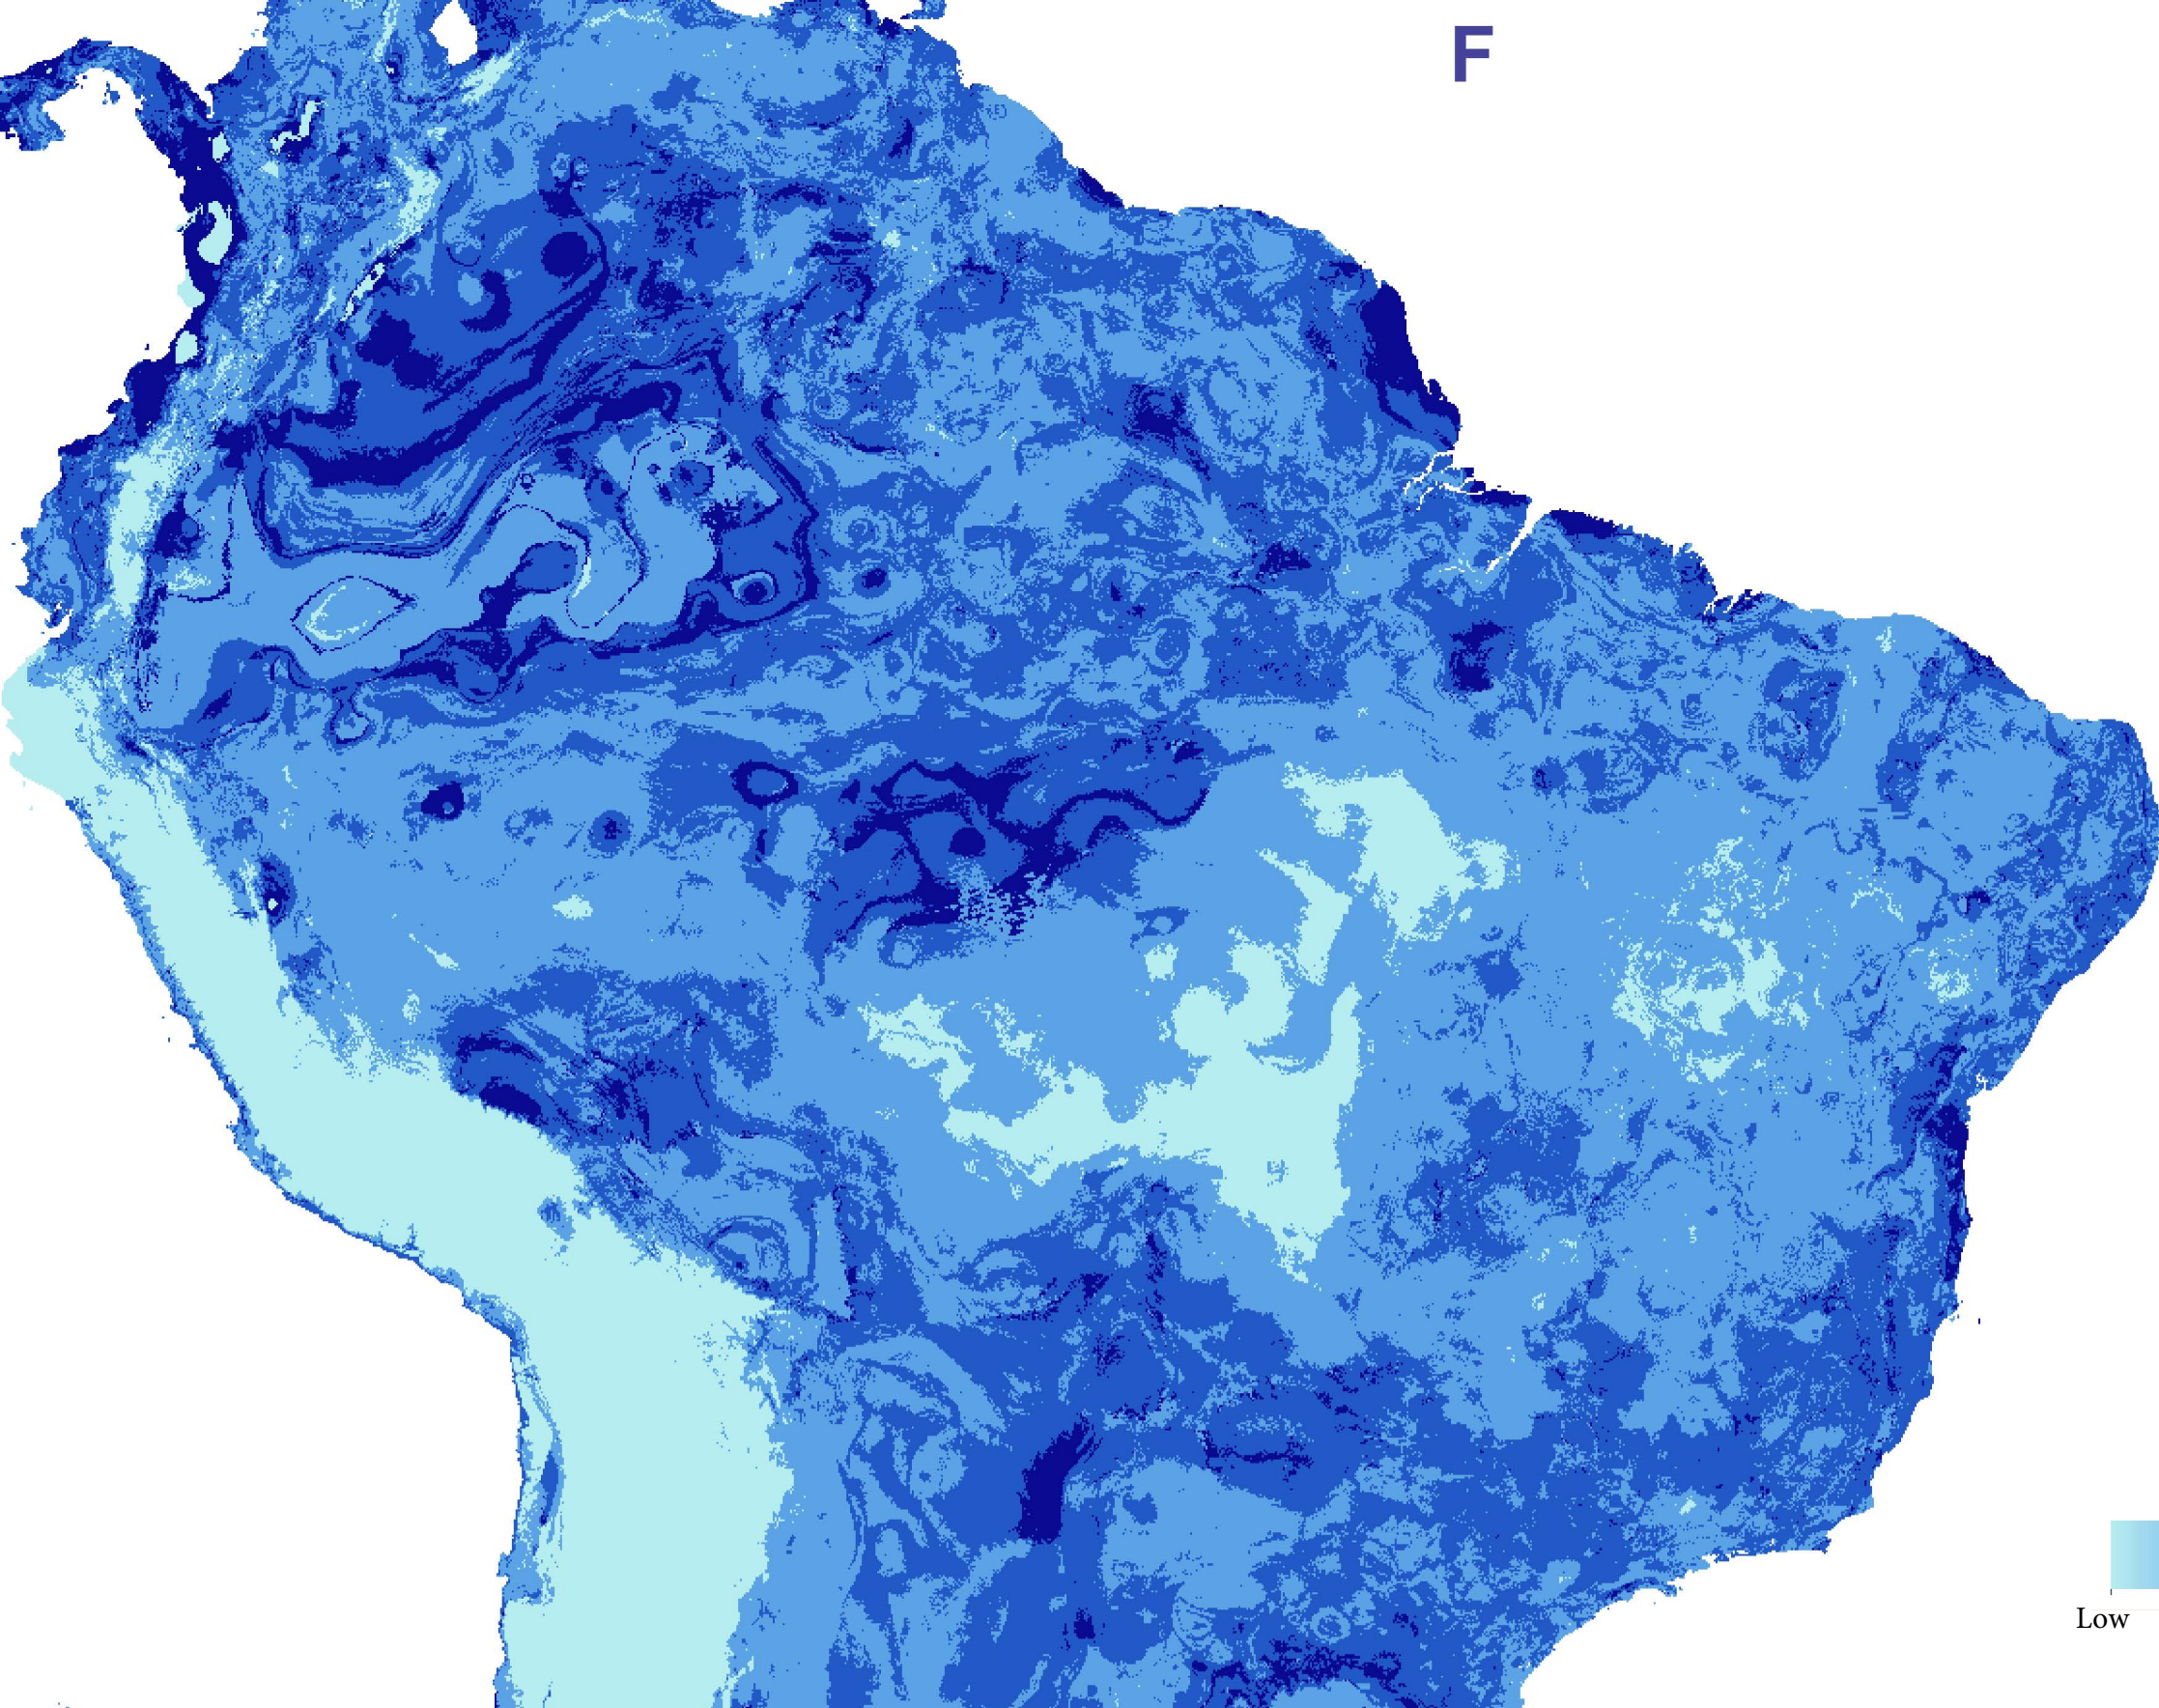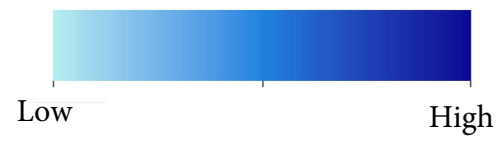



III. Visualization of uncertainty estimate associated with future predictions of *Aedes aegypti* based on diverse representative concentration pathways (RCPs) in 2050. Uncertainty index was derived from diverse GCMs in each RCP in the study; uncertainty index was estimated as the range (maximum—minimum) across all combinations of GCMs in each RCP.

RCP 2.6

2050

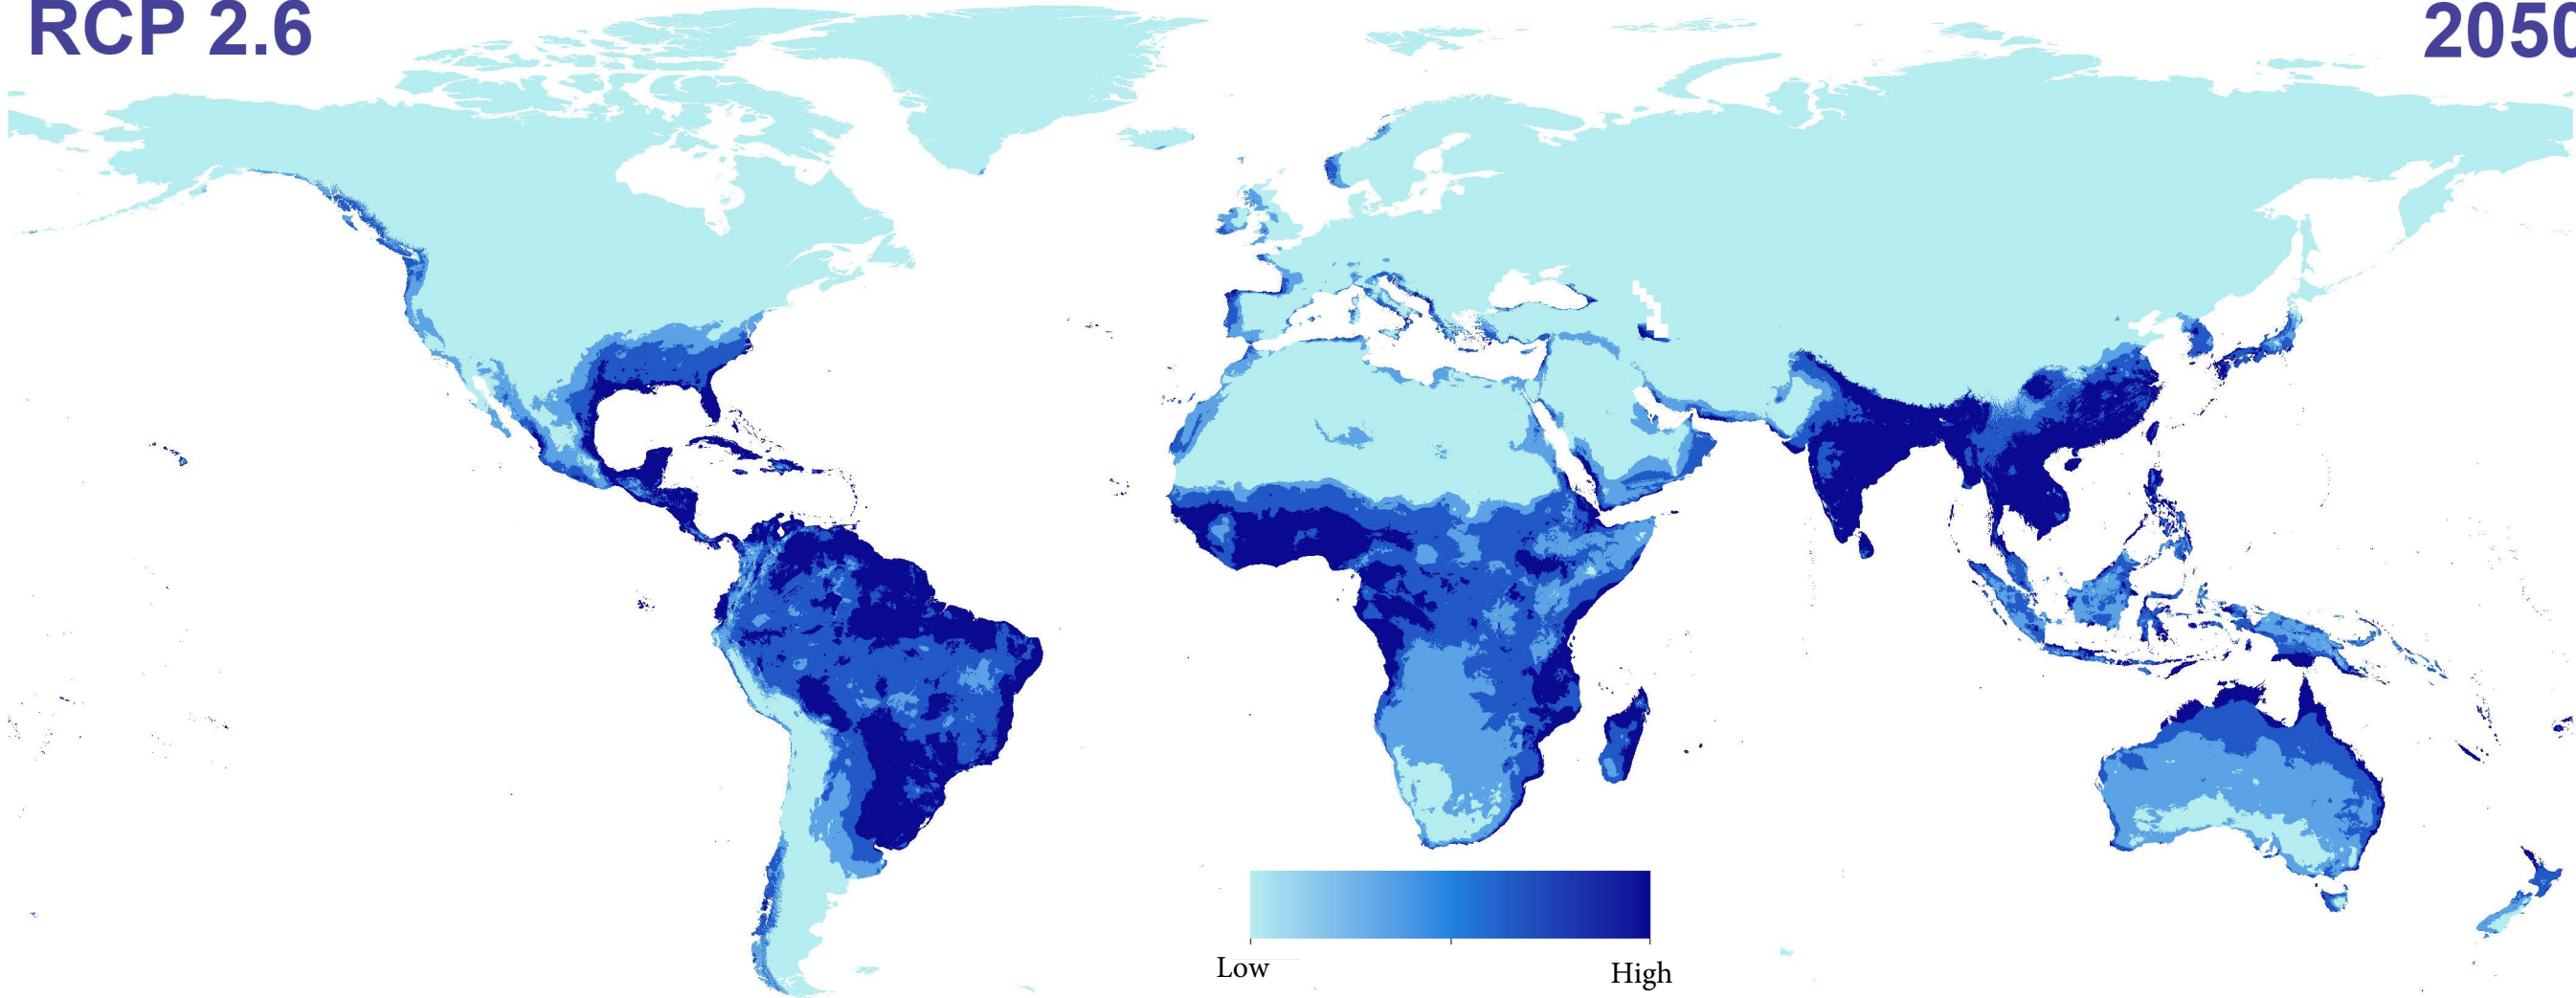

Low

High



RCP 4.5

2050

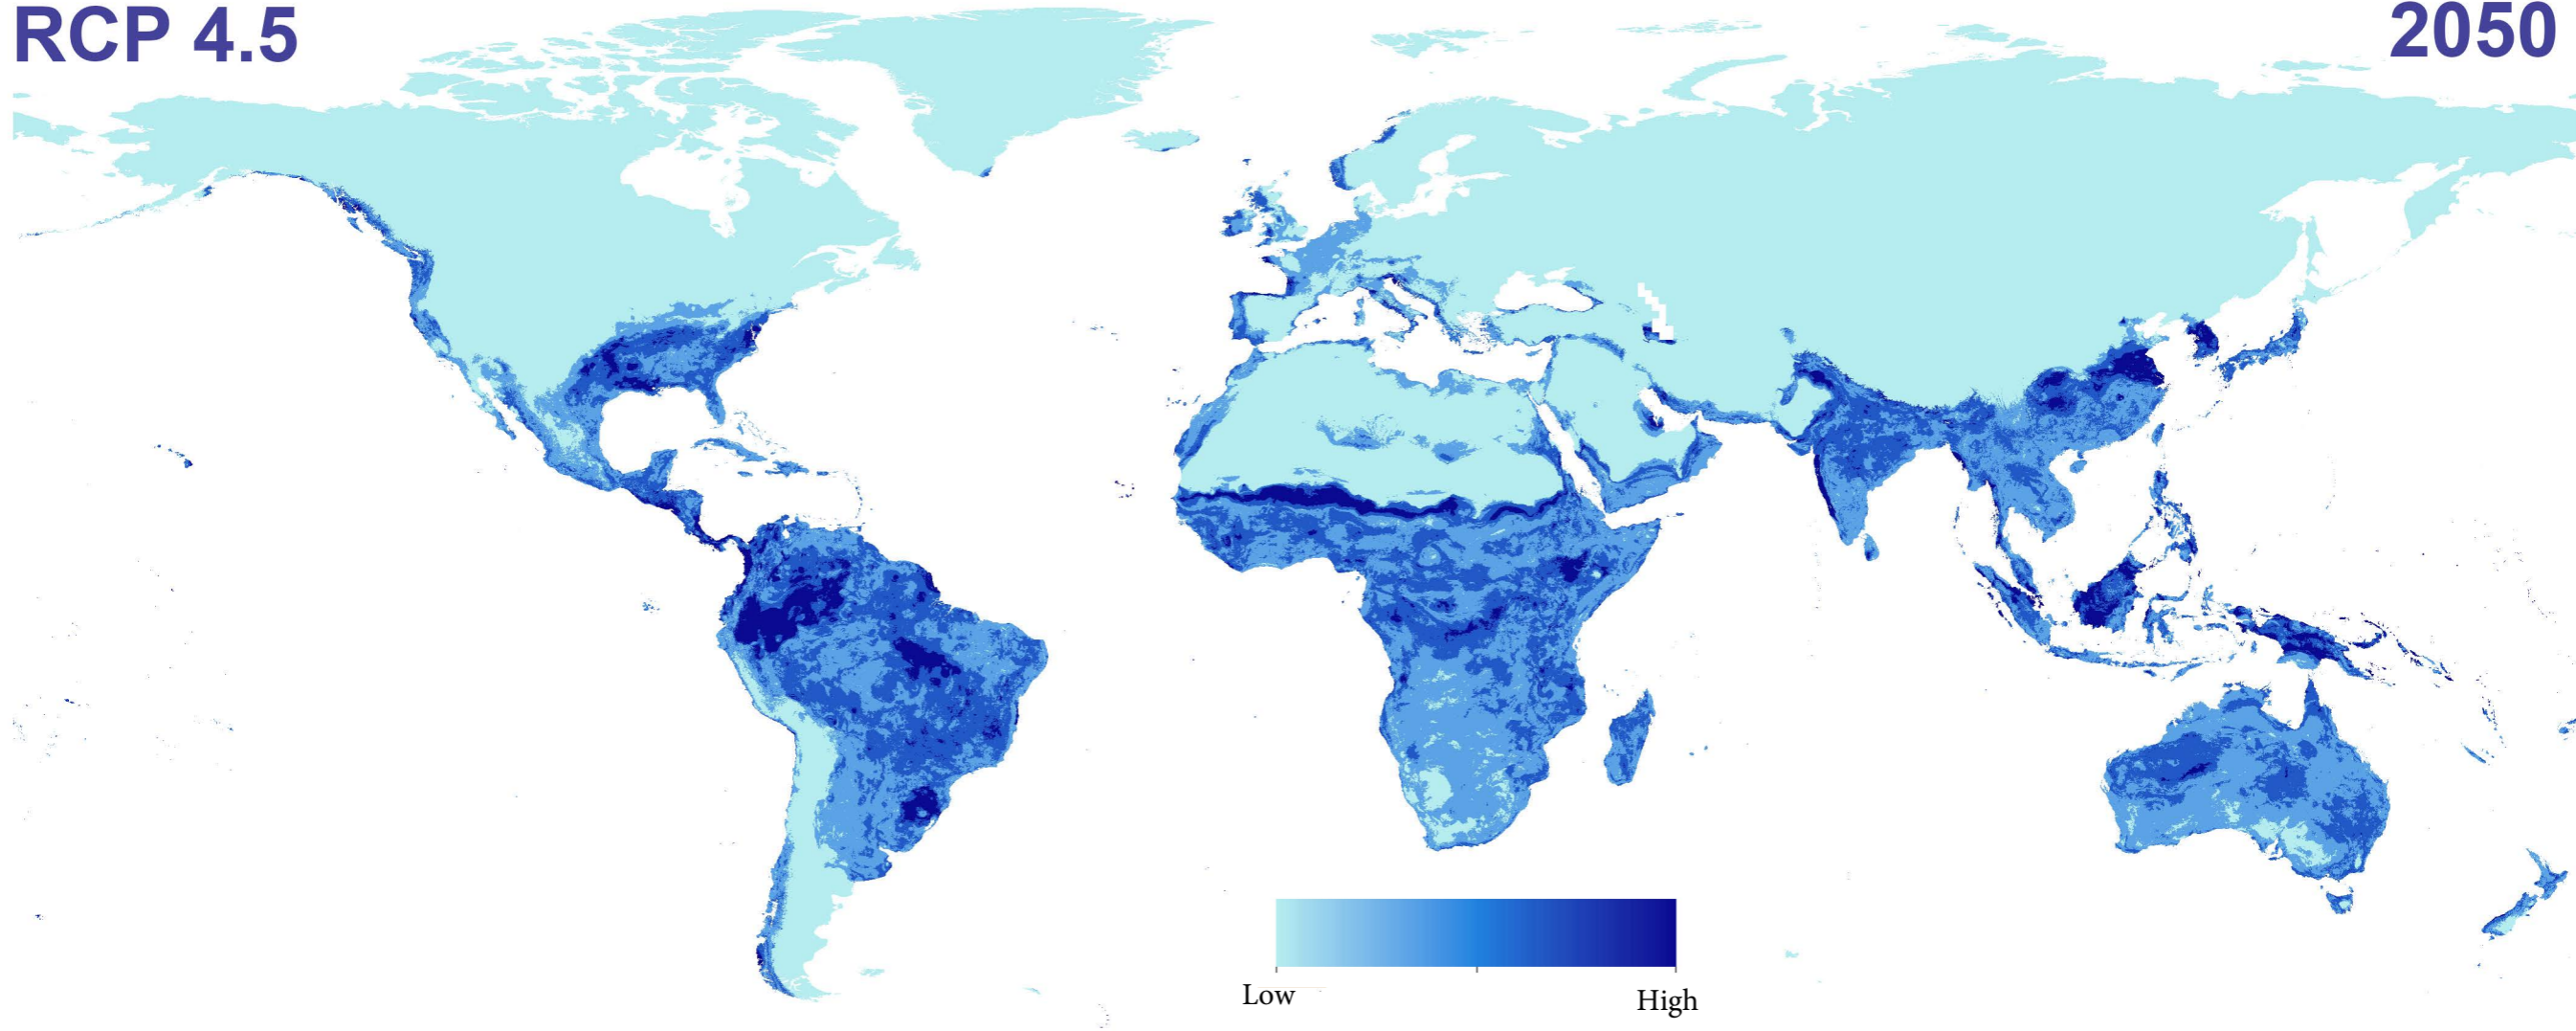

RCP 6.0

2050

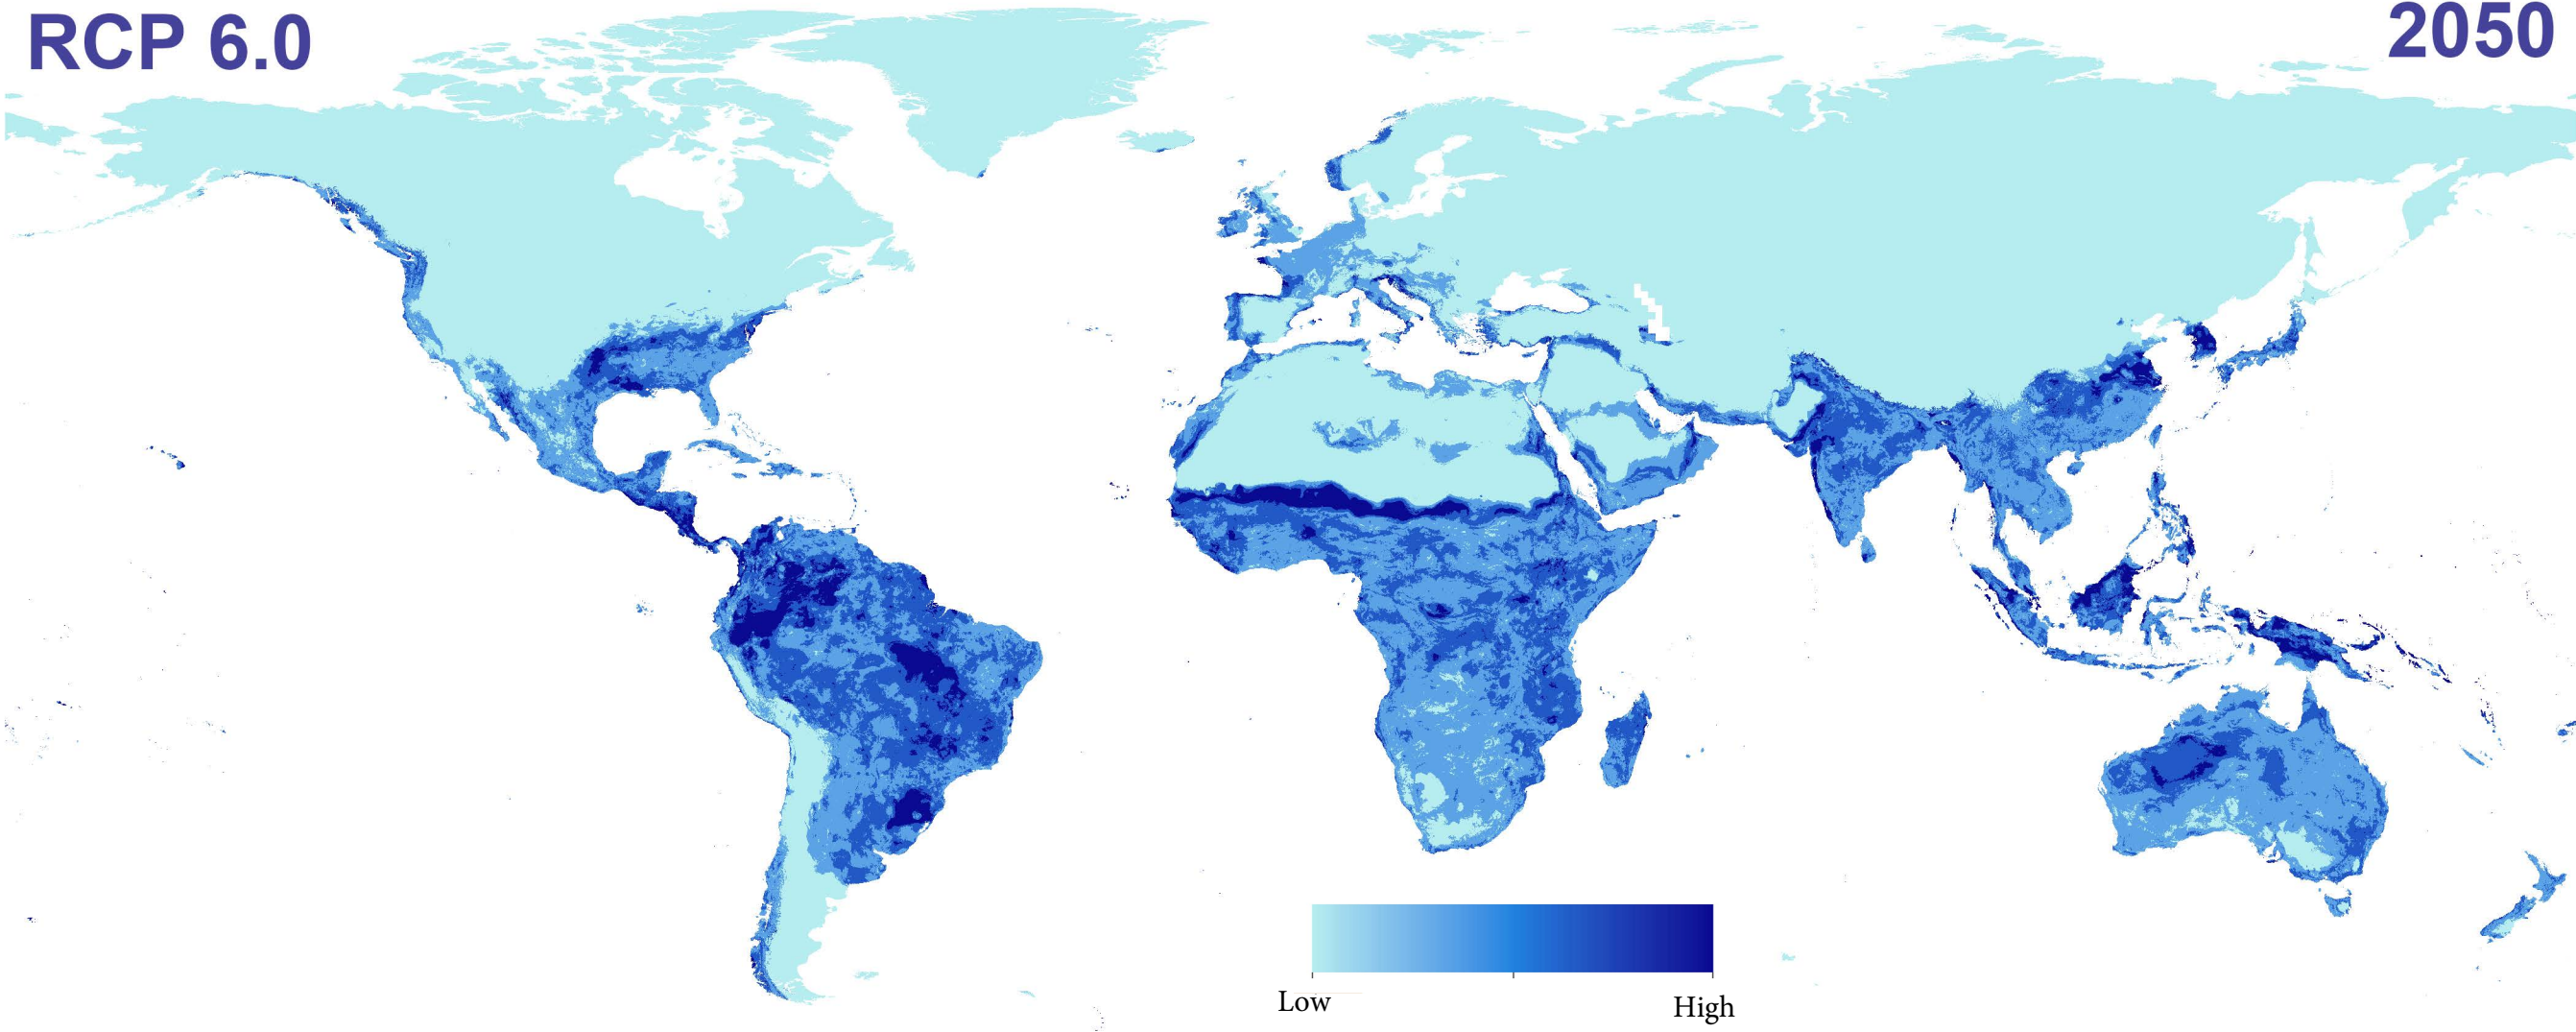



**RCP 8.5**

**2050**

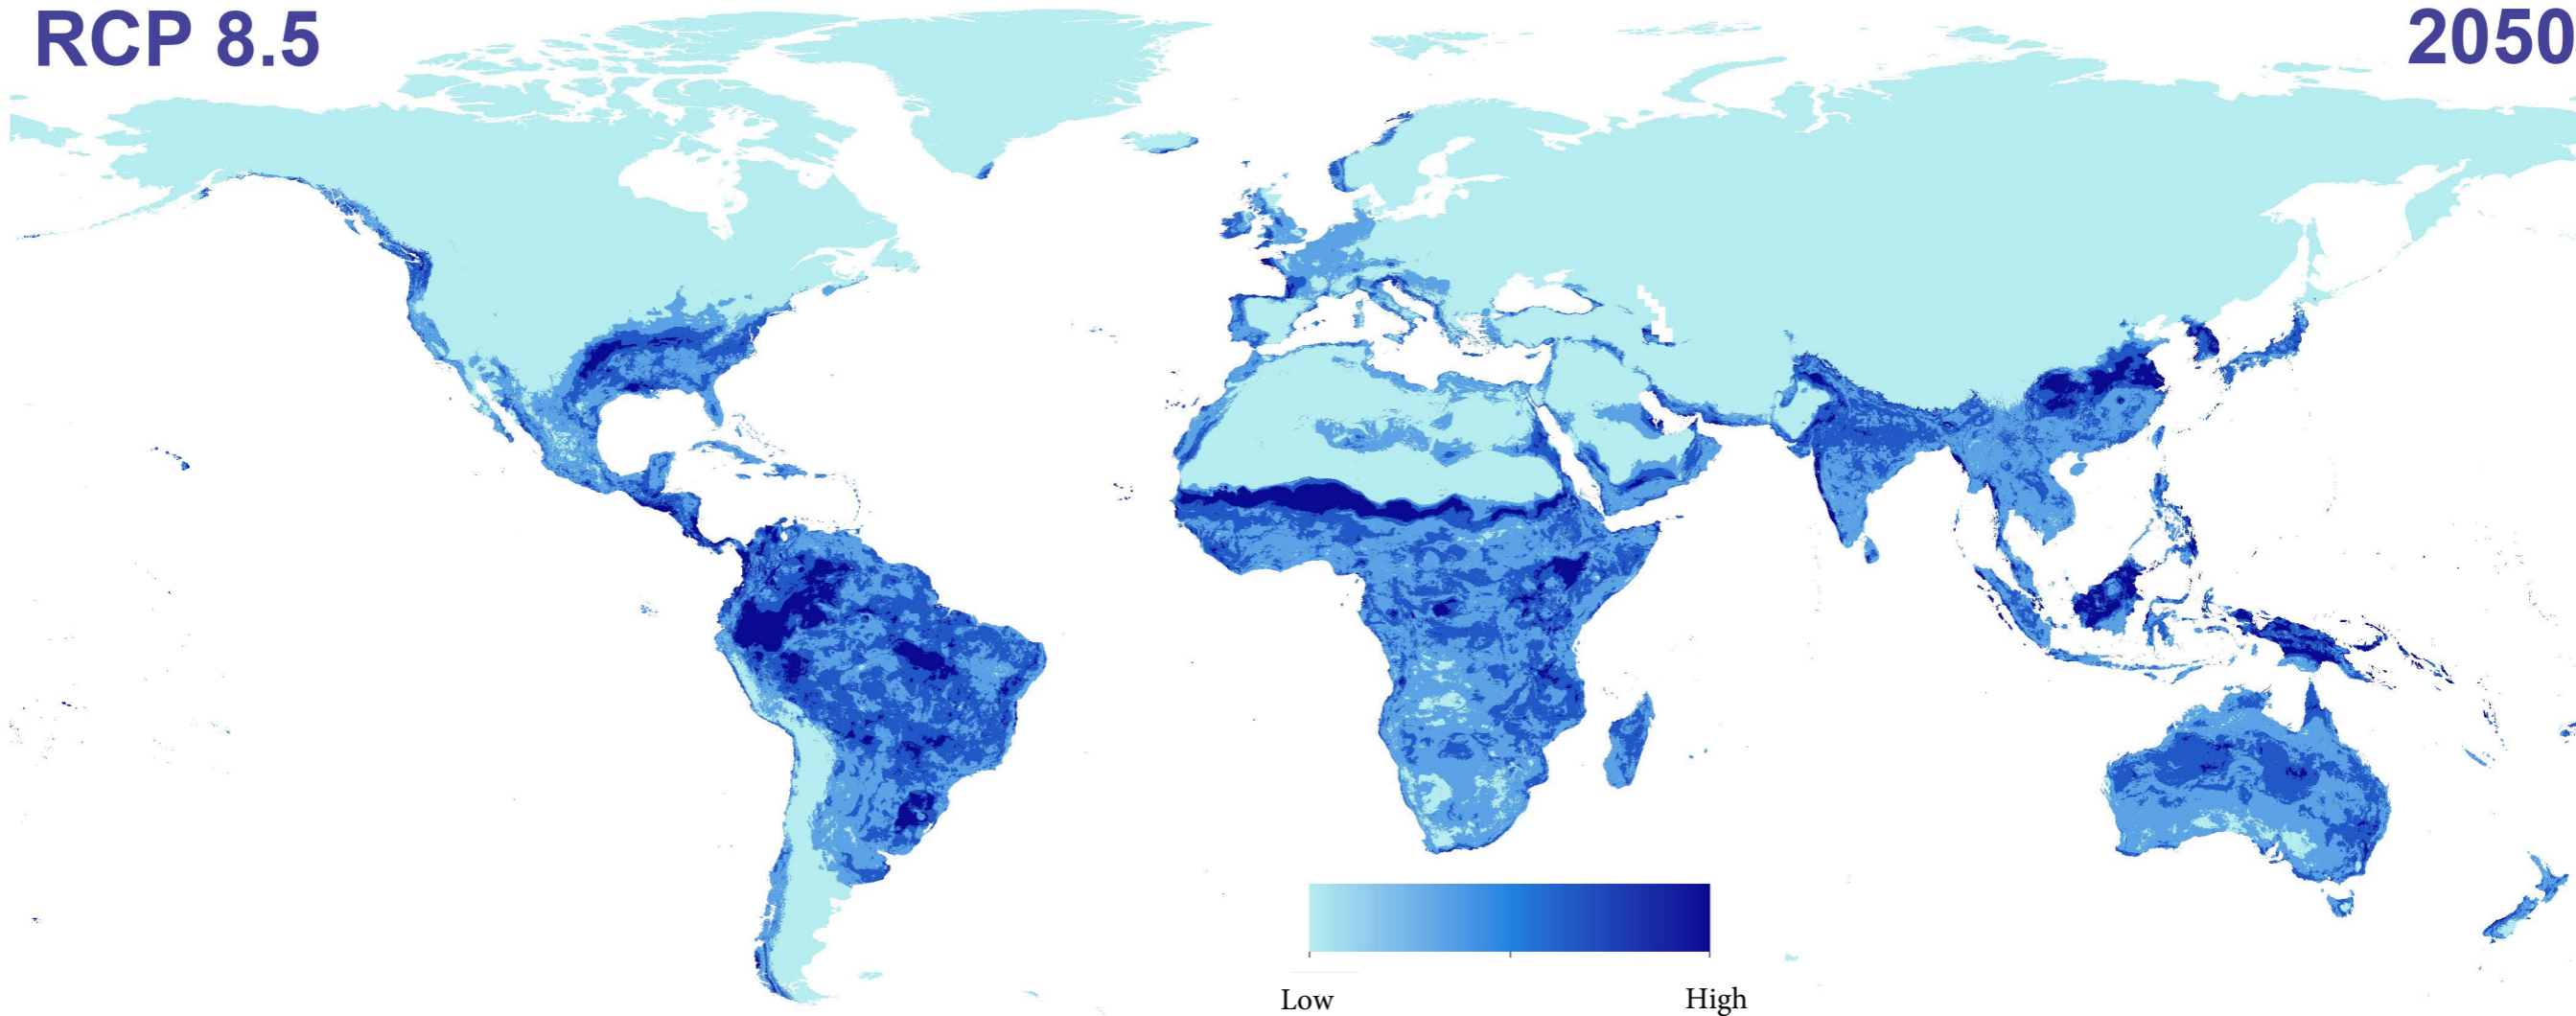

Low

High

IV. Visualization of uncertainty estimate associated with future predictions of *Aedes aegypti* based on diverse representative concentration pathways (RCPs) in 2070. Uncertainty index was derived from diverse GCMs in each RCP in the study; uncertainty index was estimated as the range (maximum—minimum) across all combinations of GCMs in each RCP.



RCP 2.6

2070

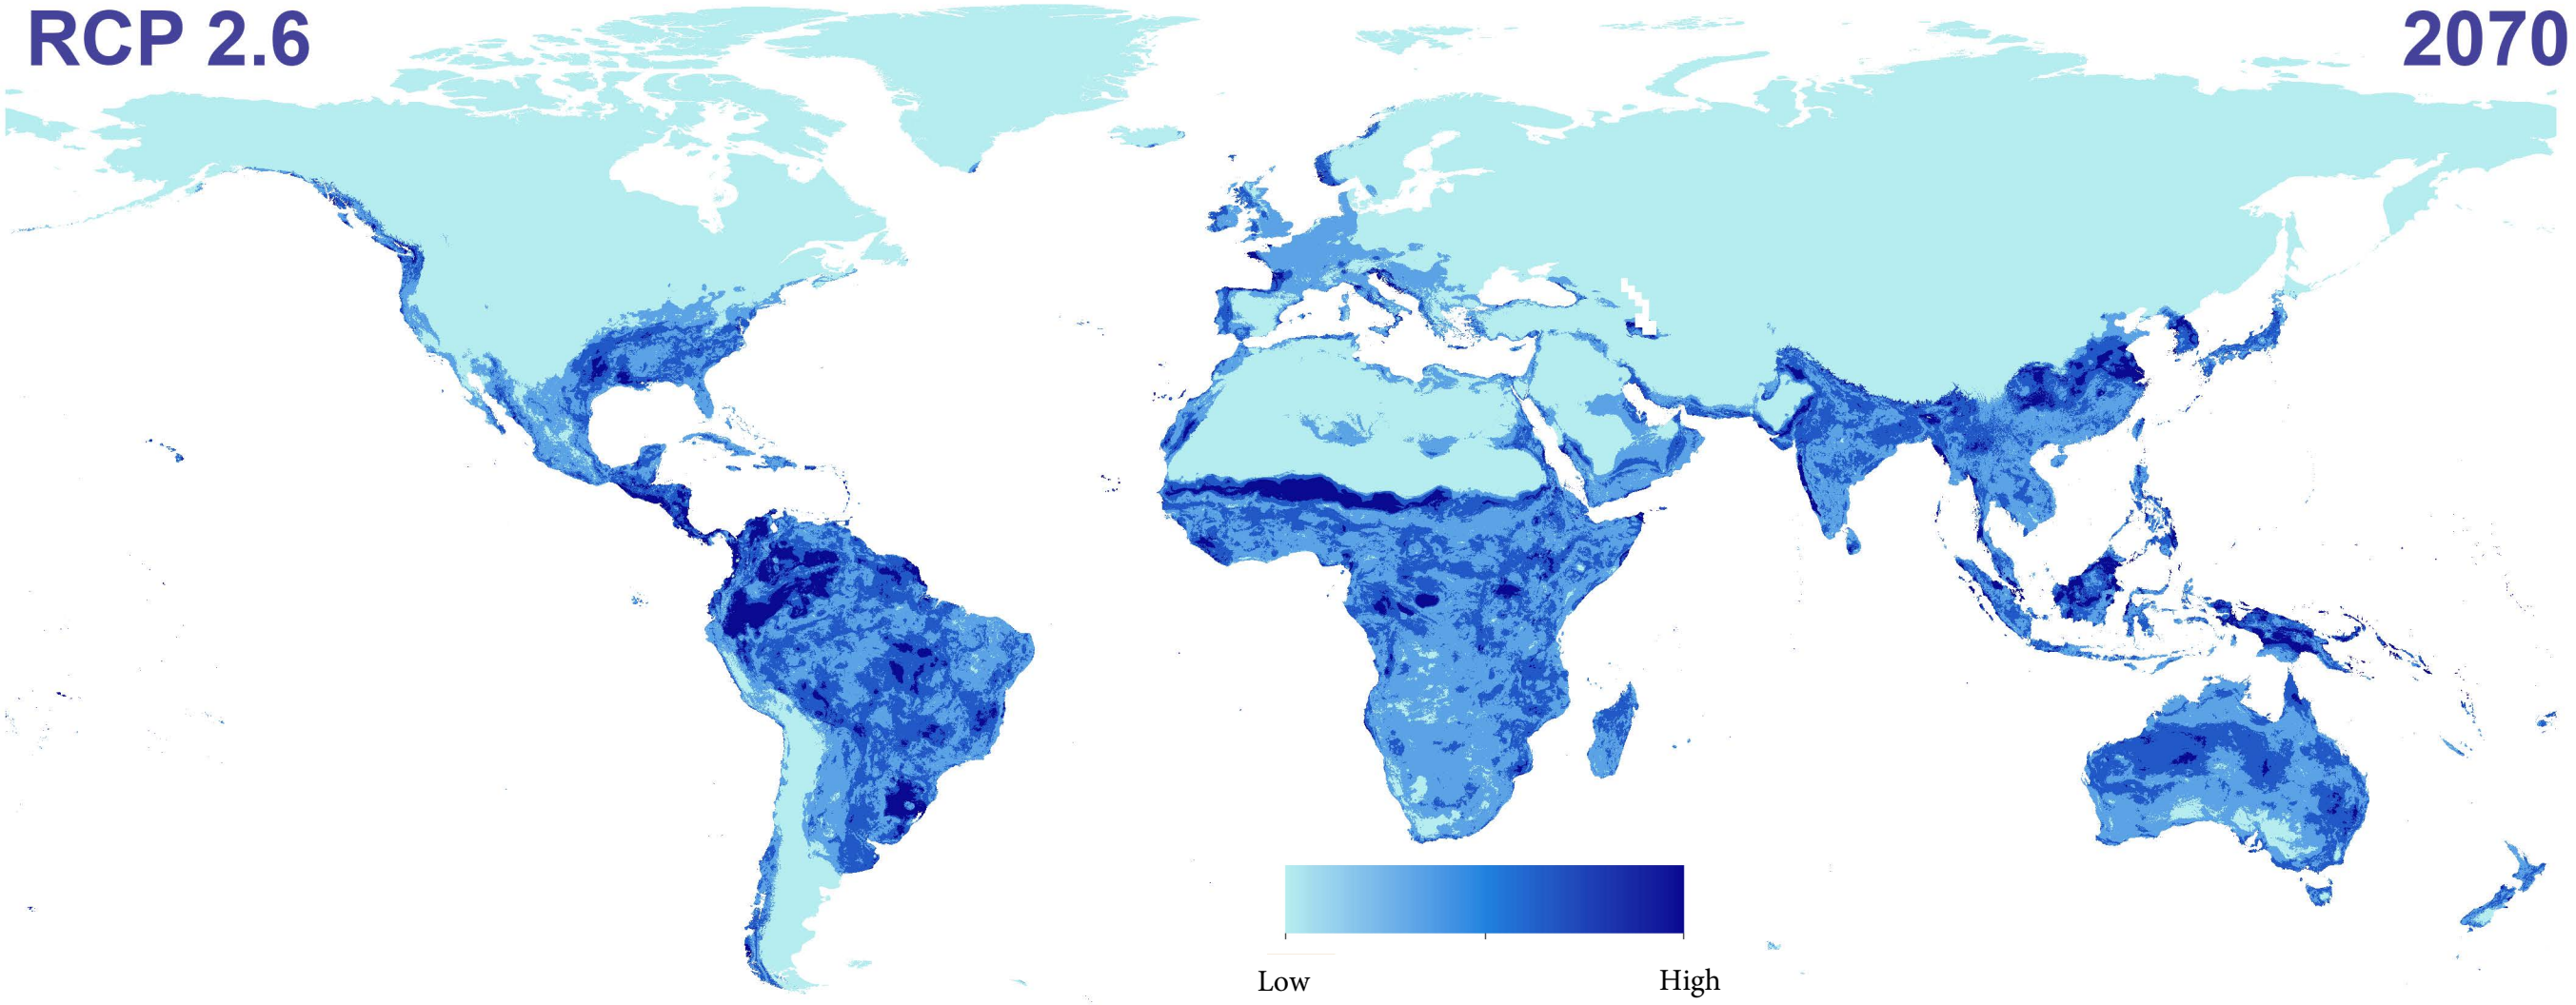

Low

High

RCP 4.5

2070

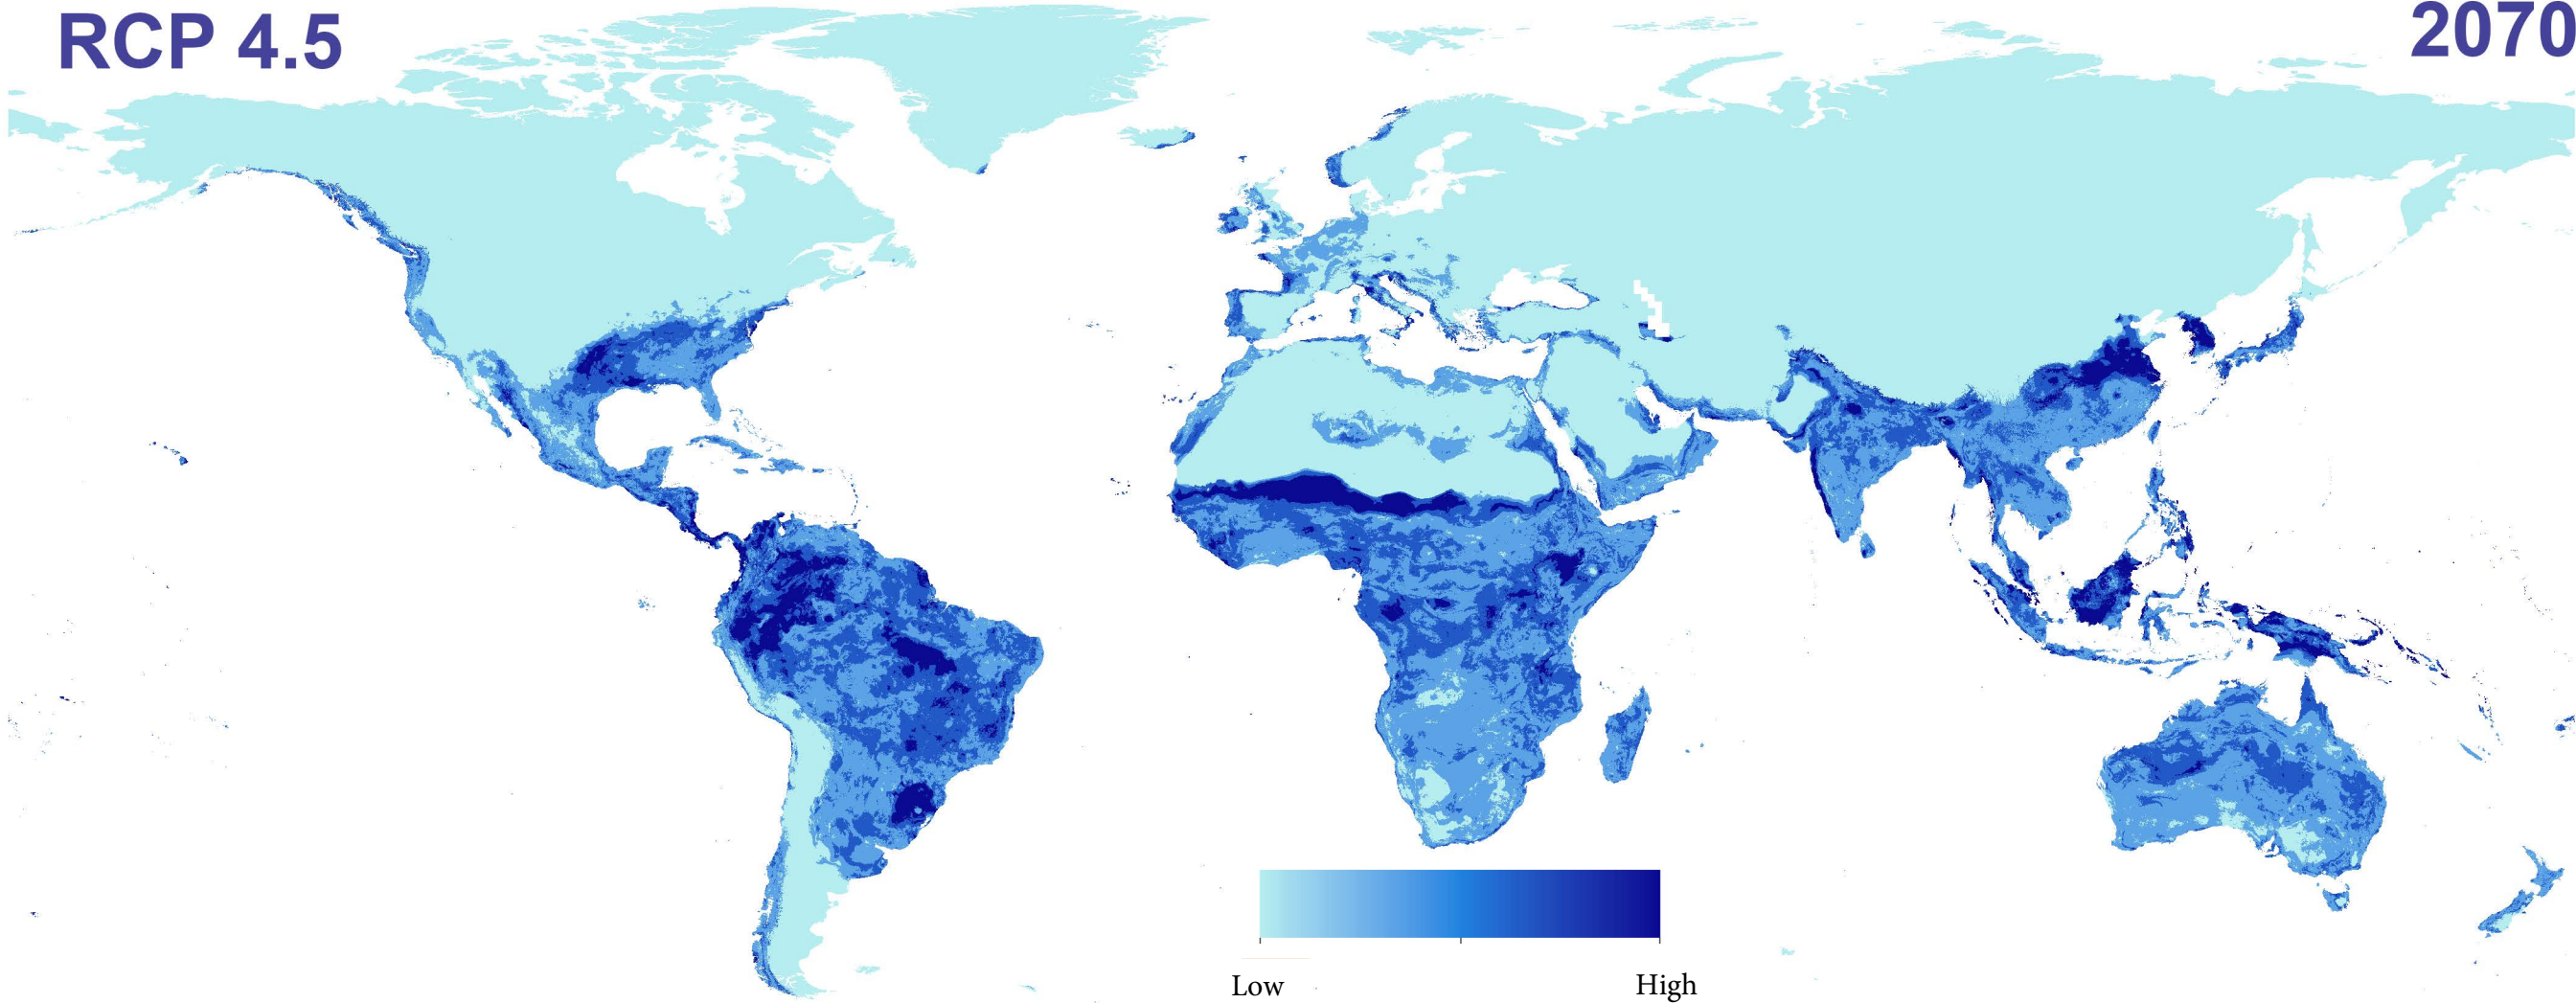



RCP 6.0

2070

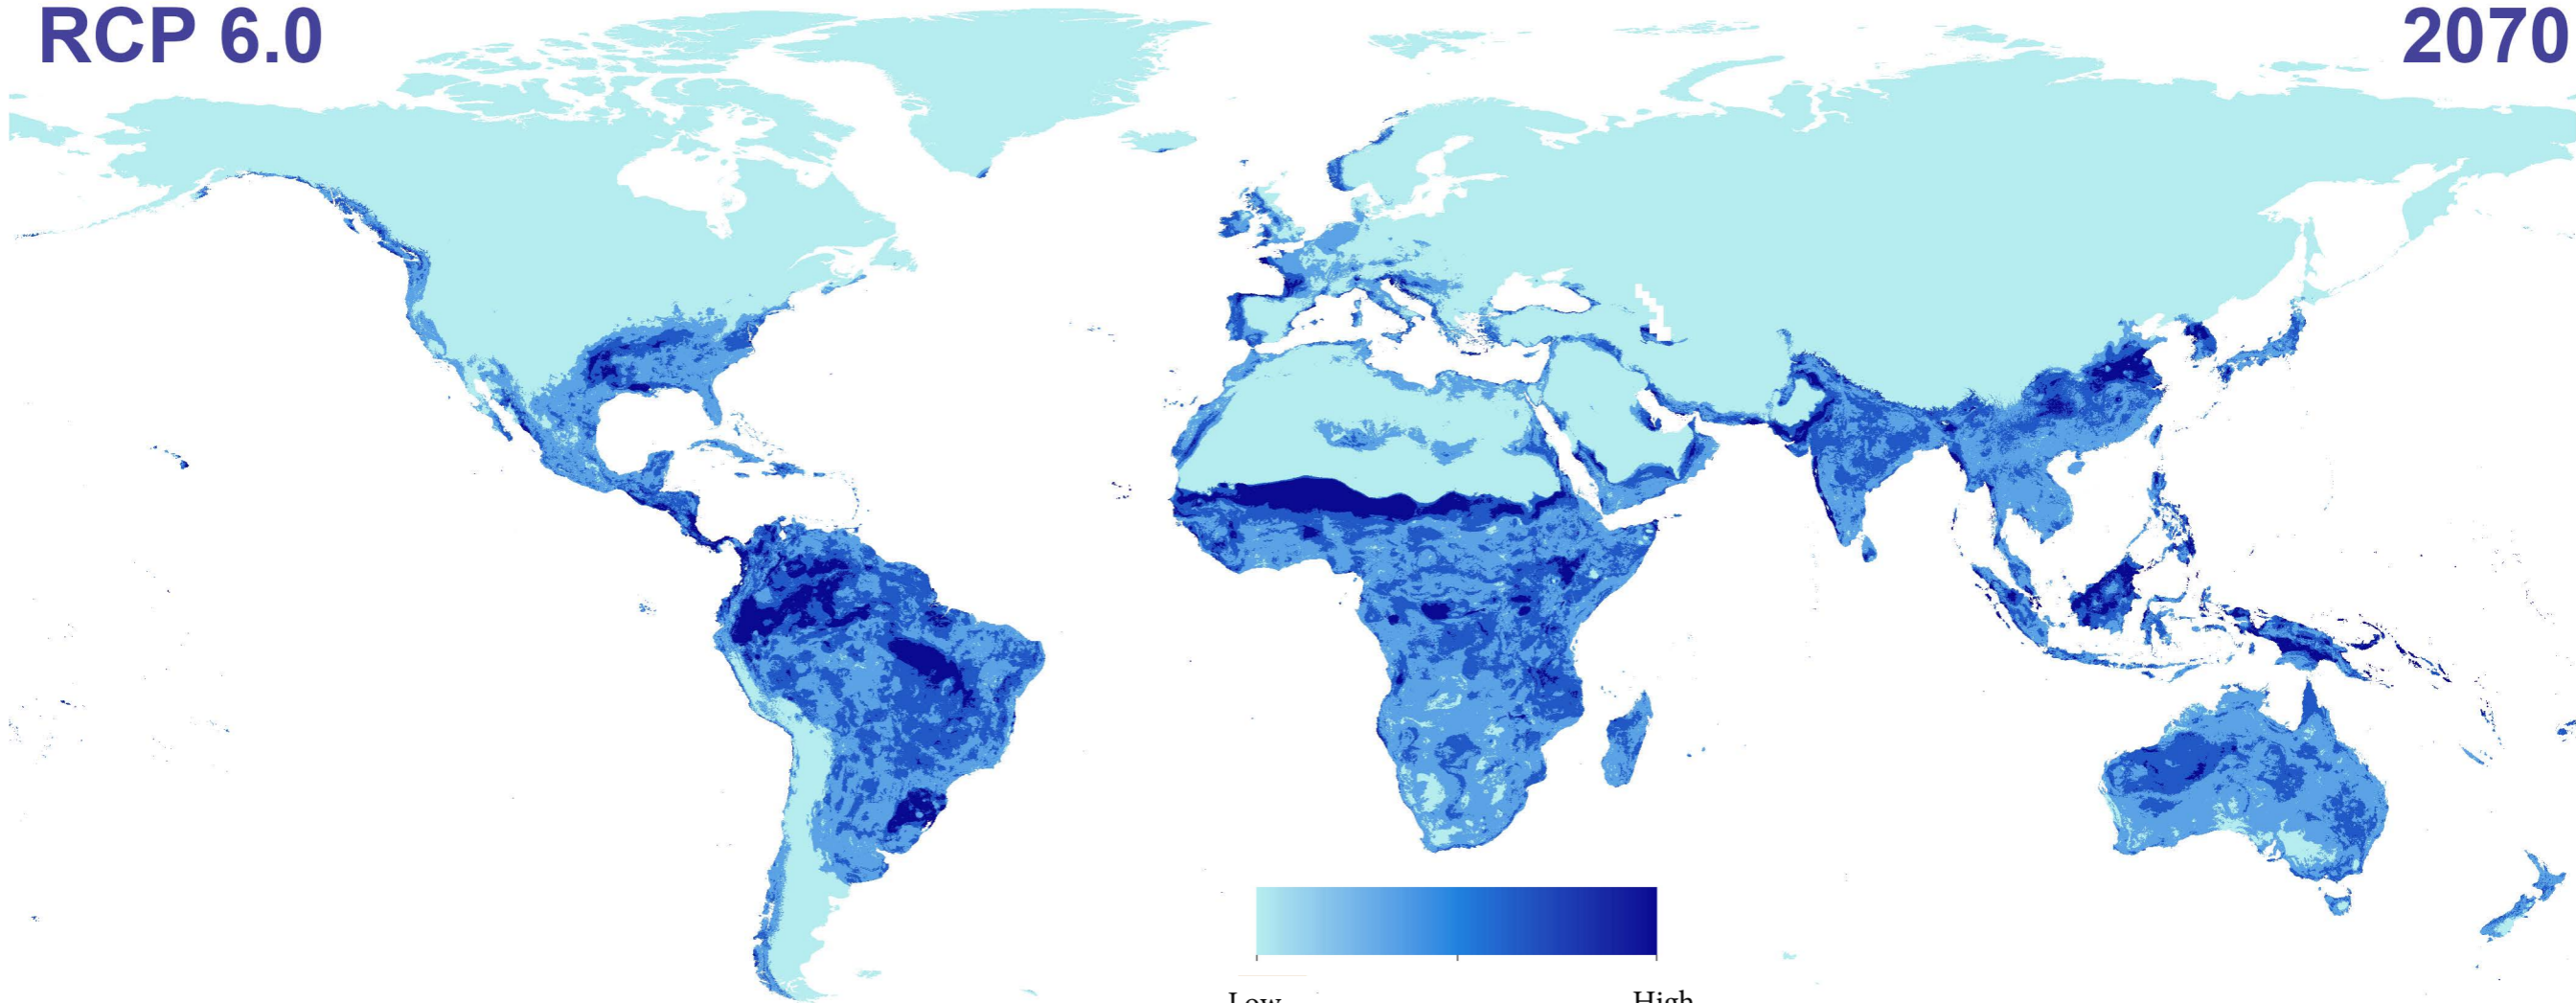

Low

High

**RCP 8.5**

**2070**

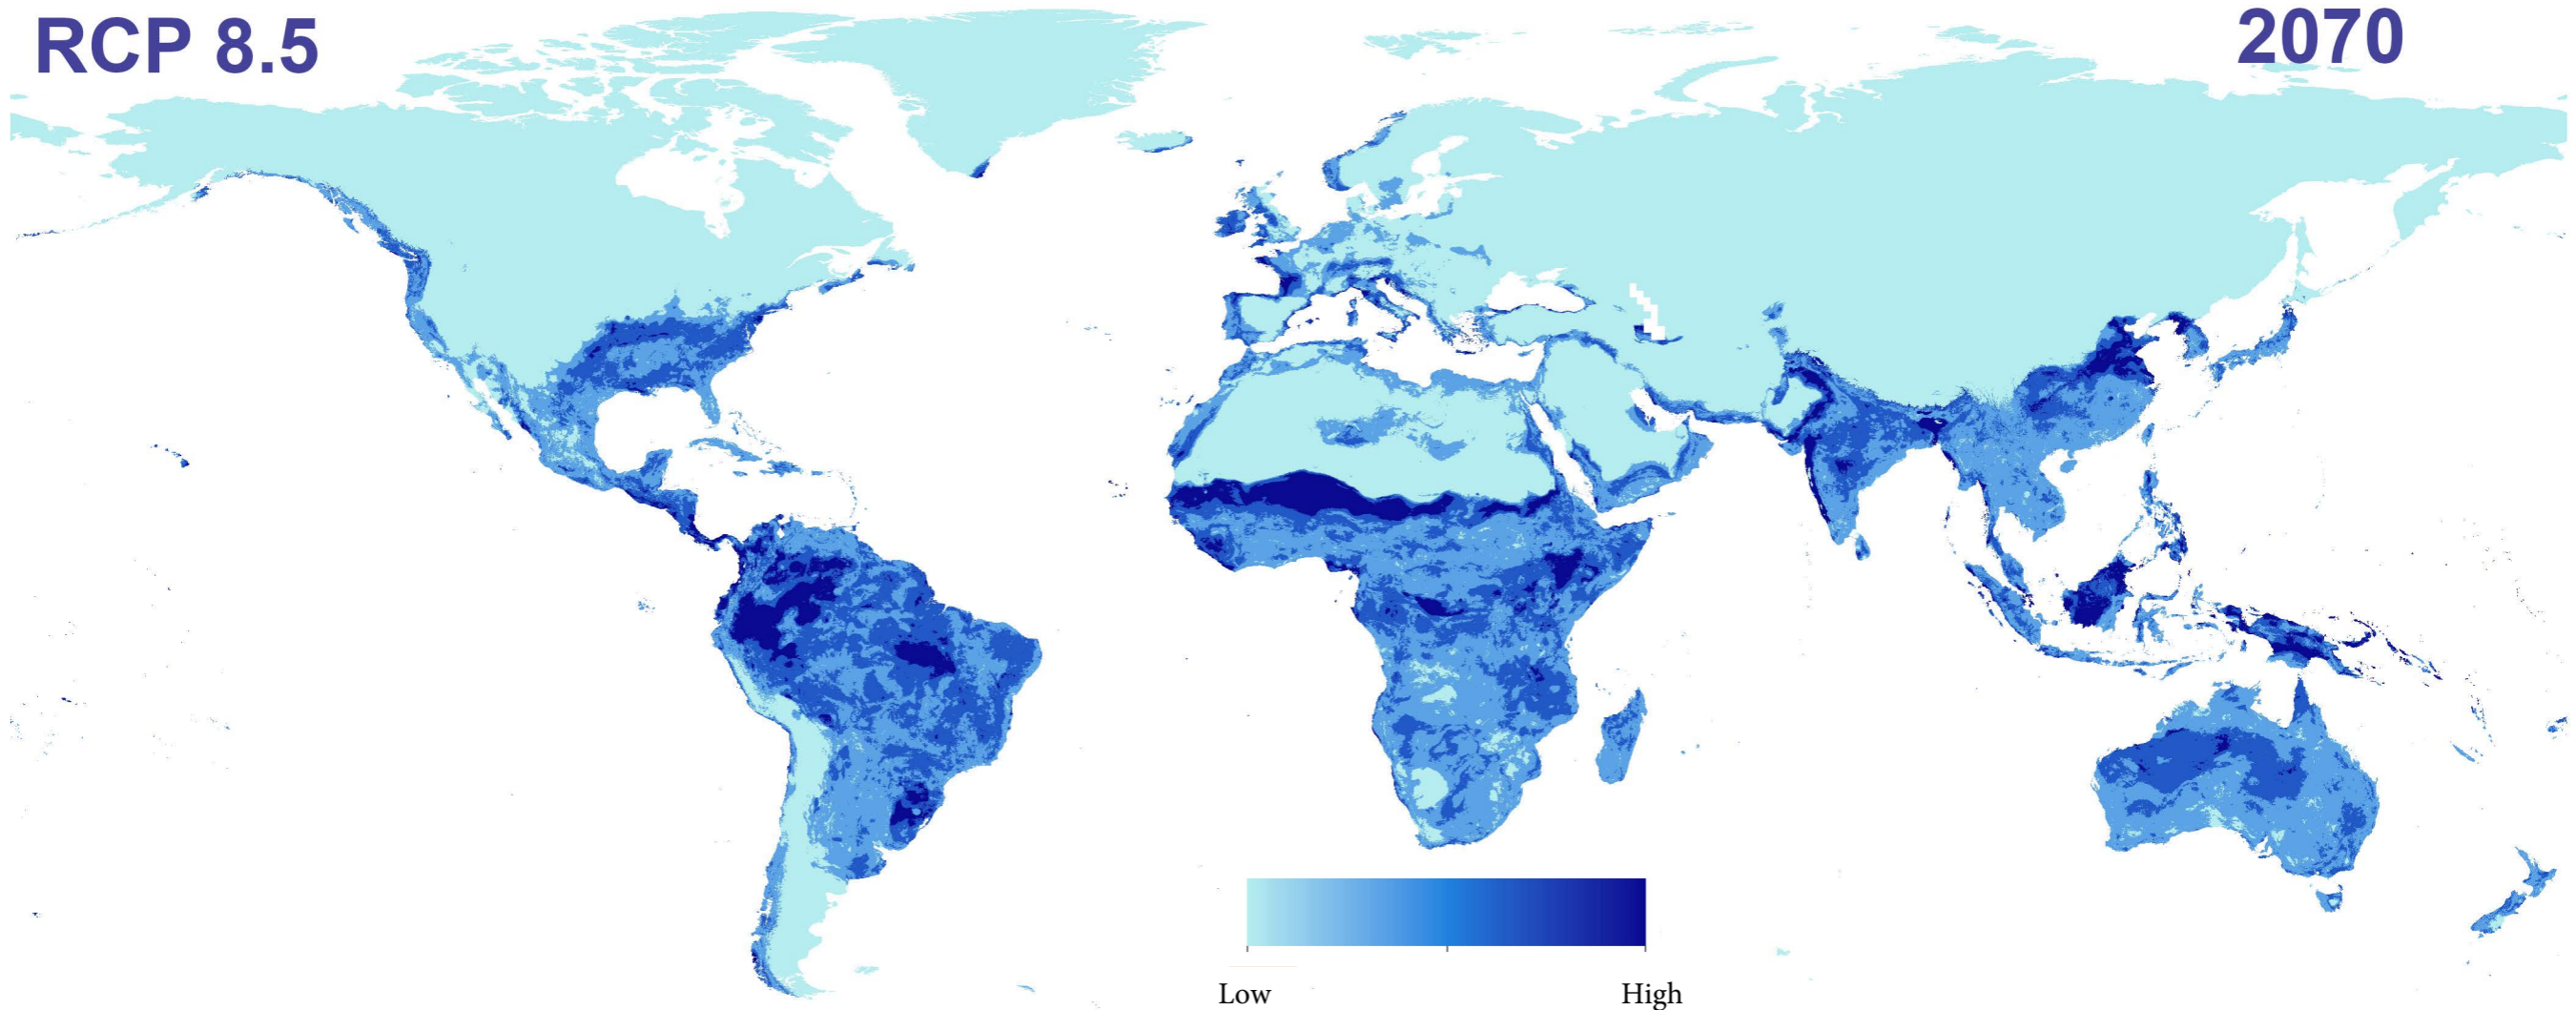



V. Visualization of uncertainty estimate associated with future predictions of *Aedes albopictus* based on diverse representative concentration pathways (RCPs) in 2050. Uncertainty index was derived from diverse GCMs in each RCP in the study; uncertainty index was estimated as the range (maximum—minimum) across all combinations of GCMs in each RCP.

RCP 2.6

2050

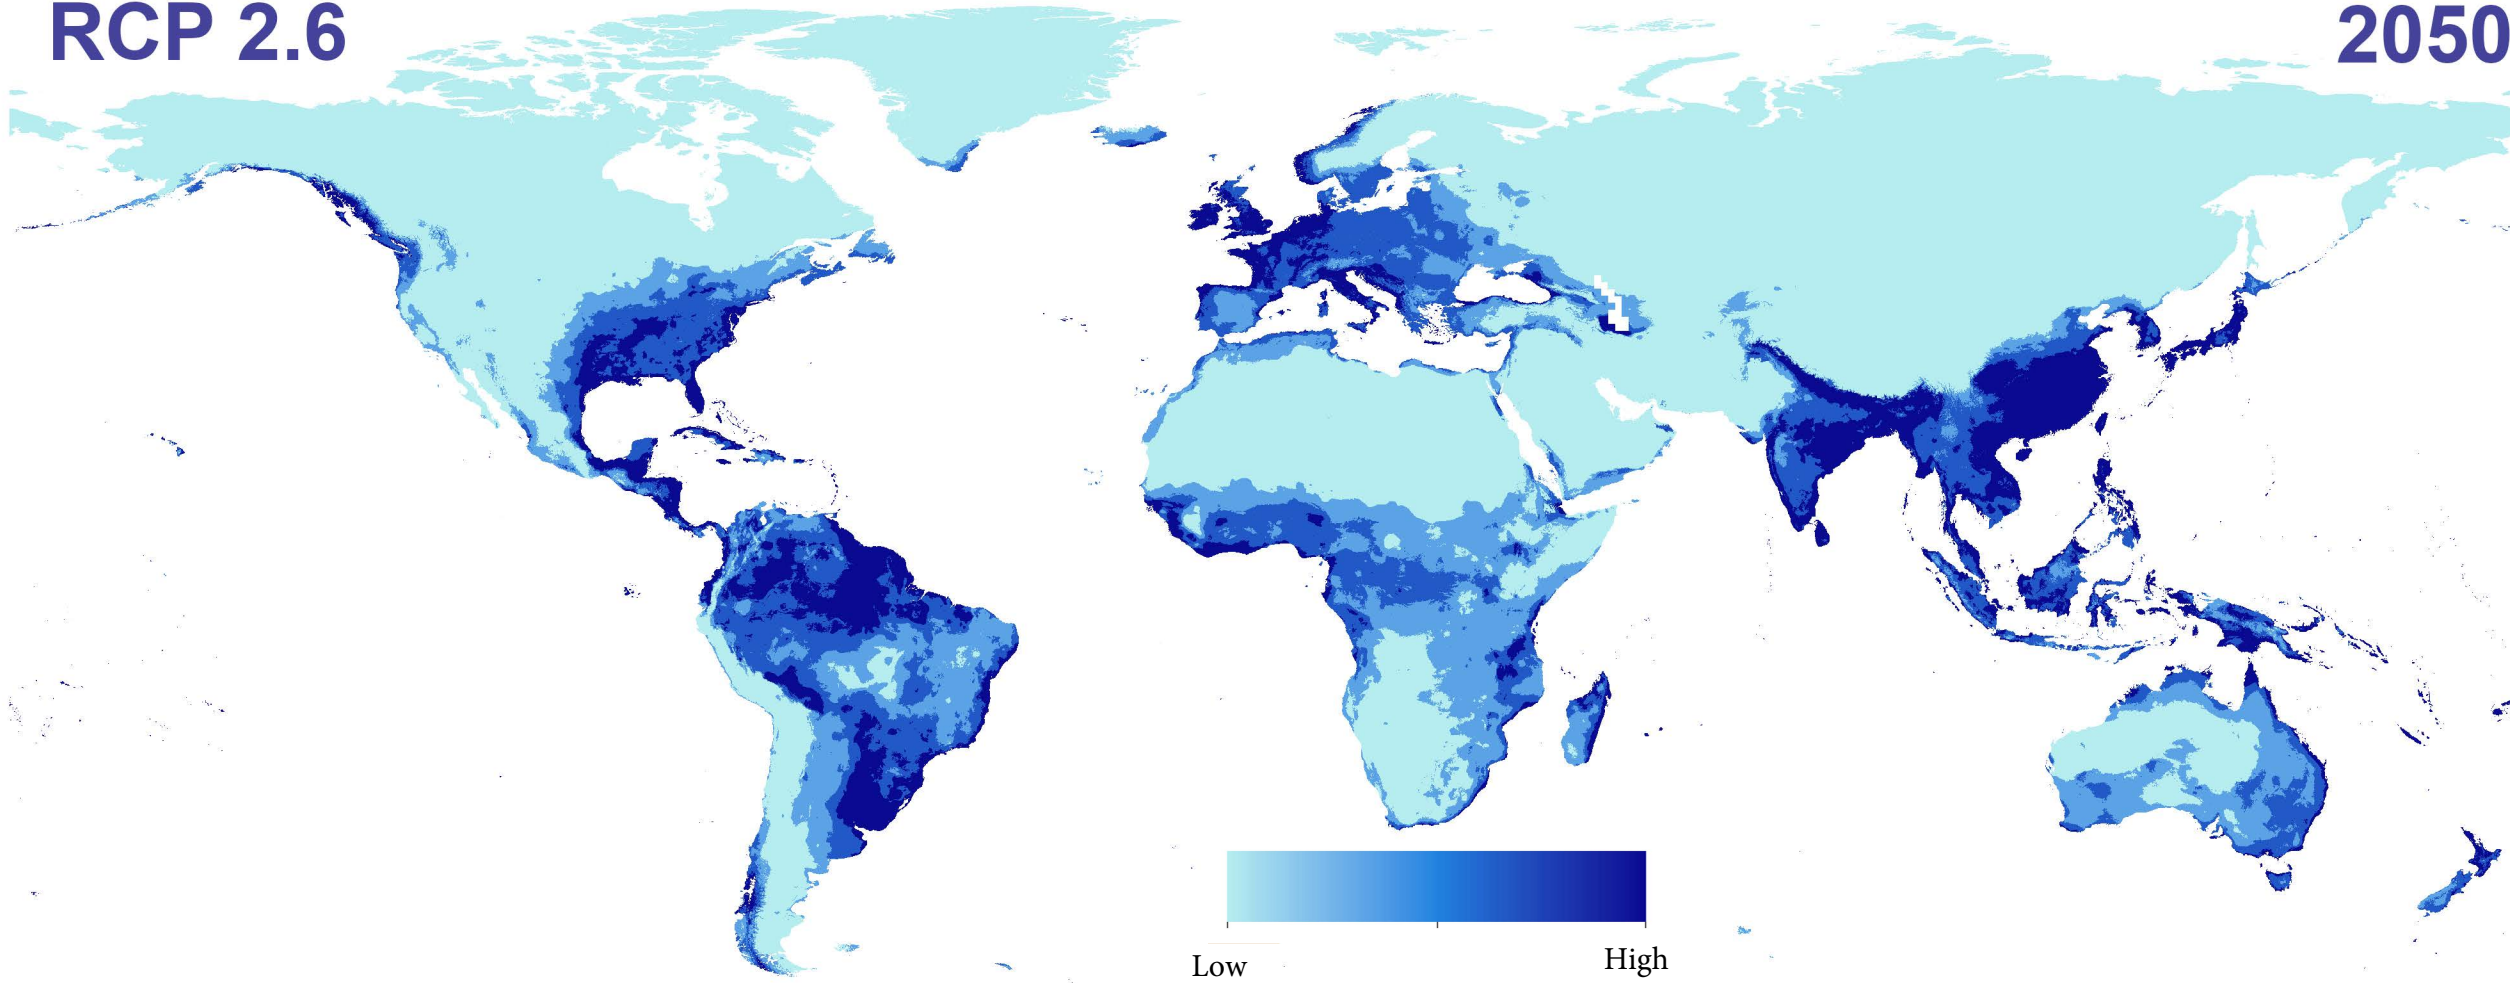



RCP 4.5

2050

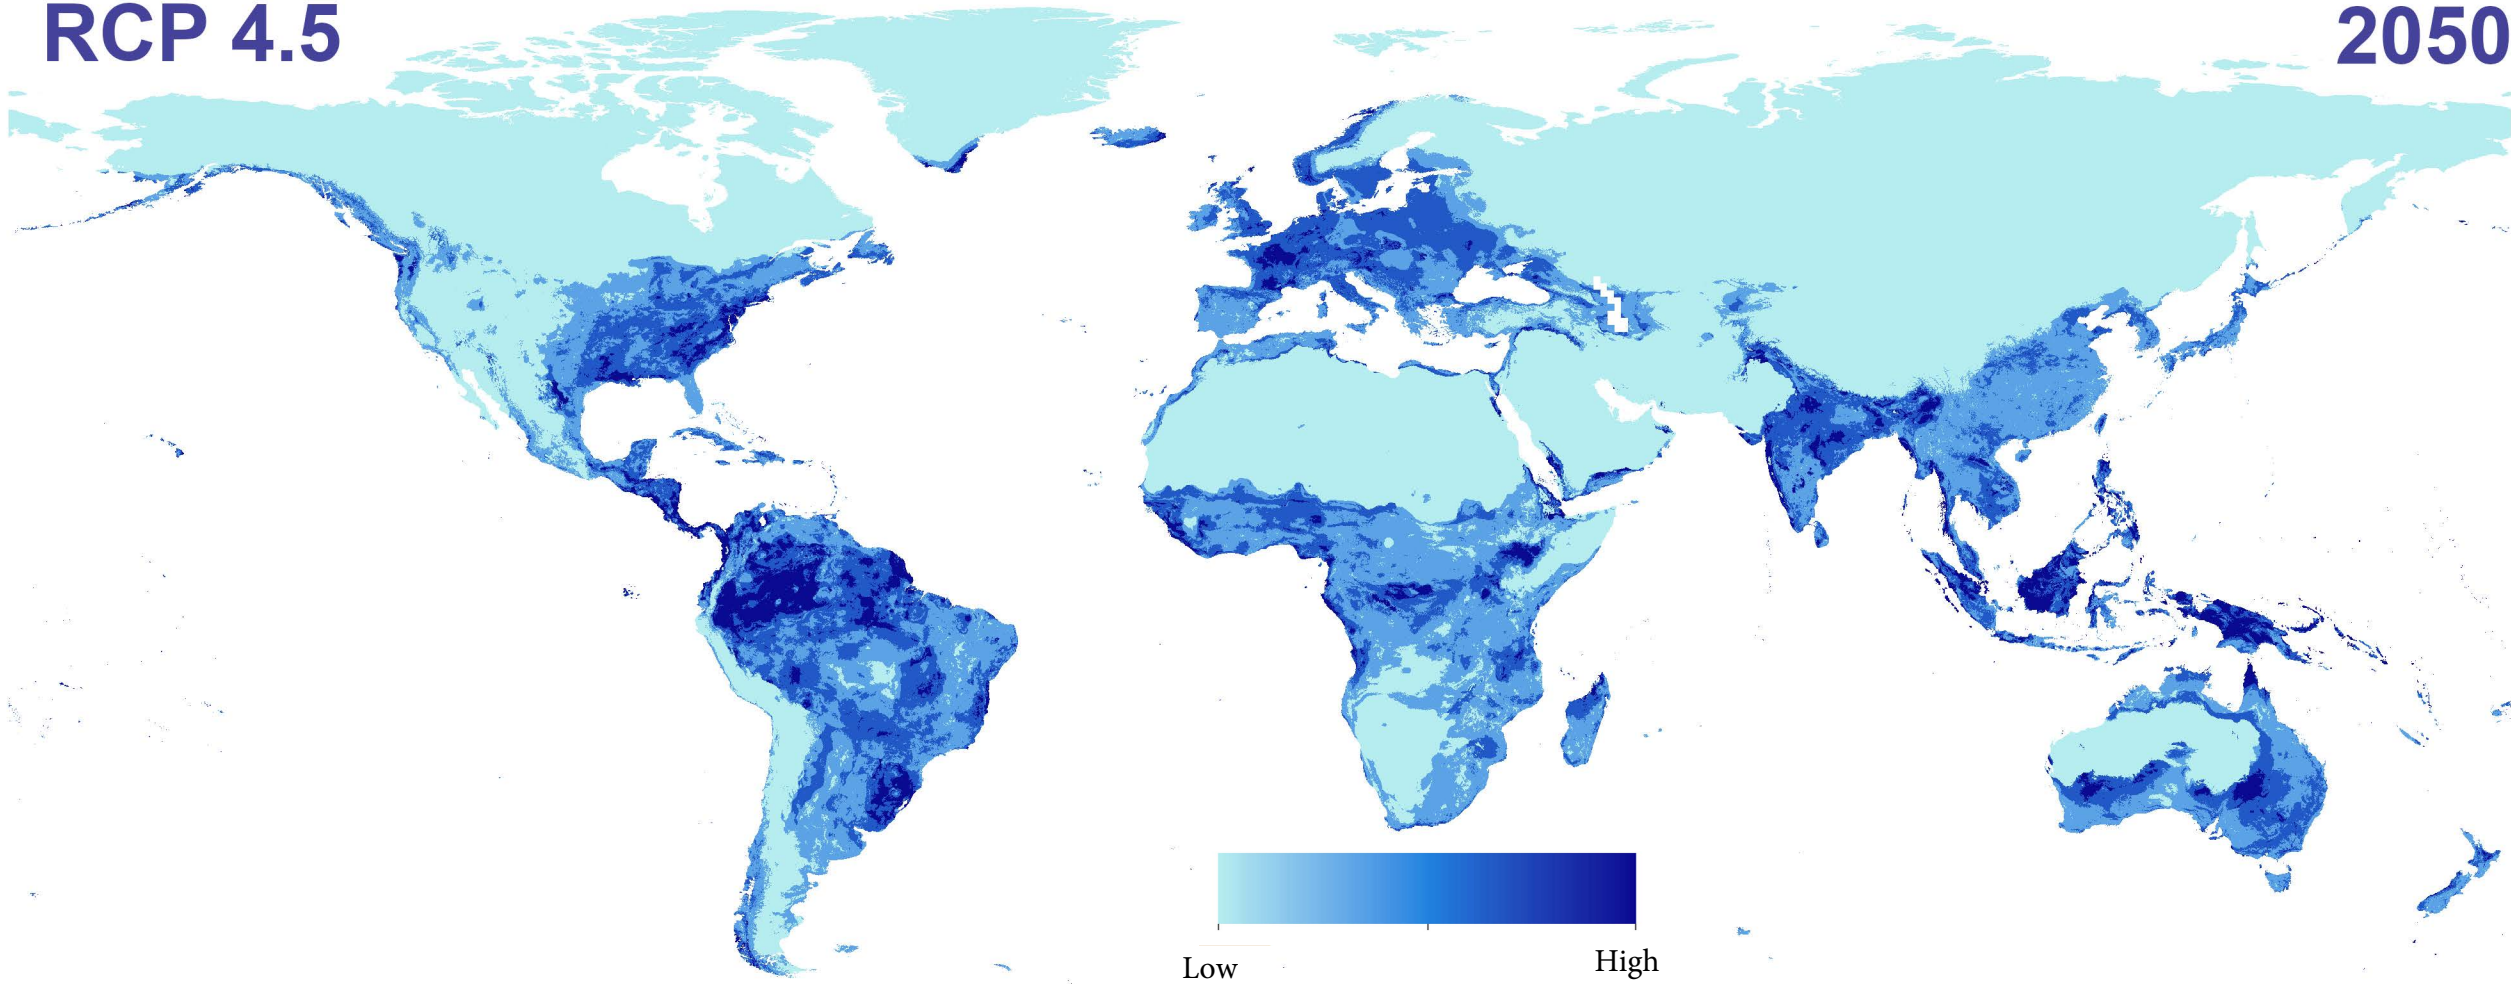

Low

High

RCP 6.0

2050

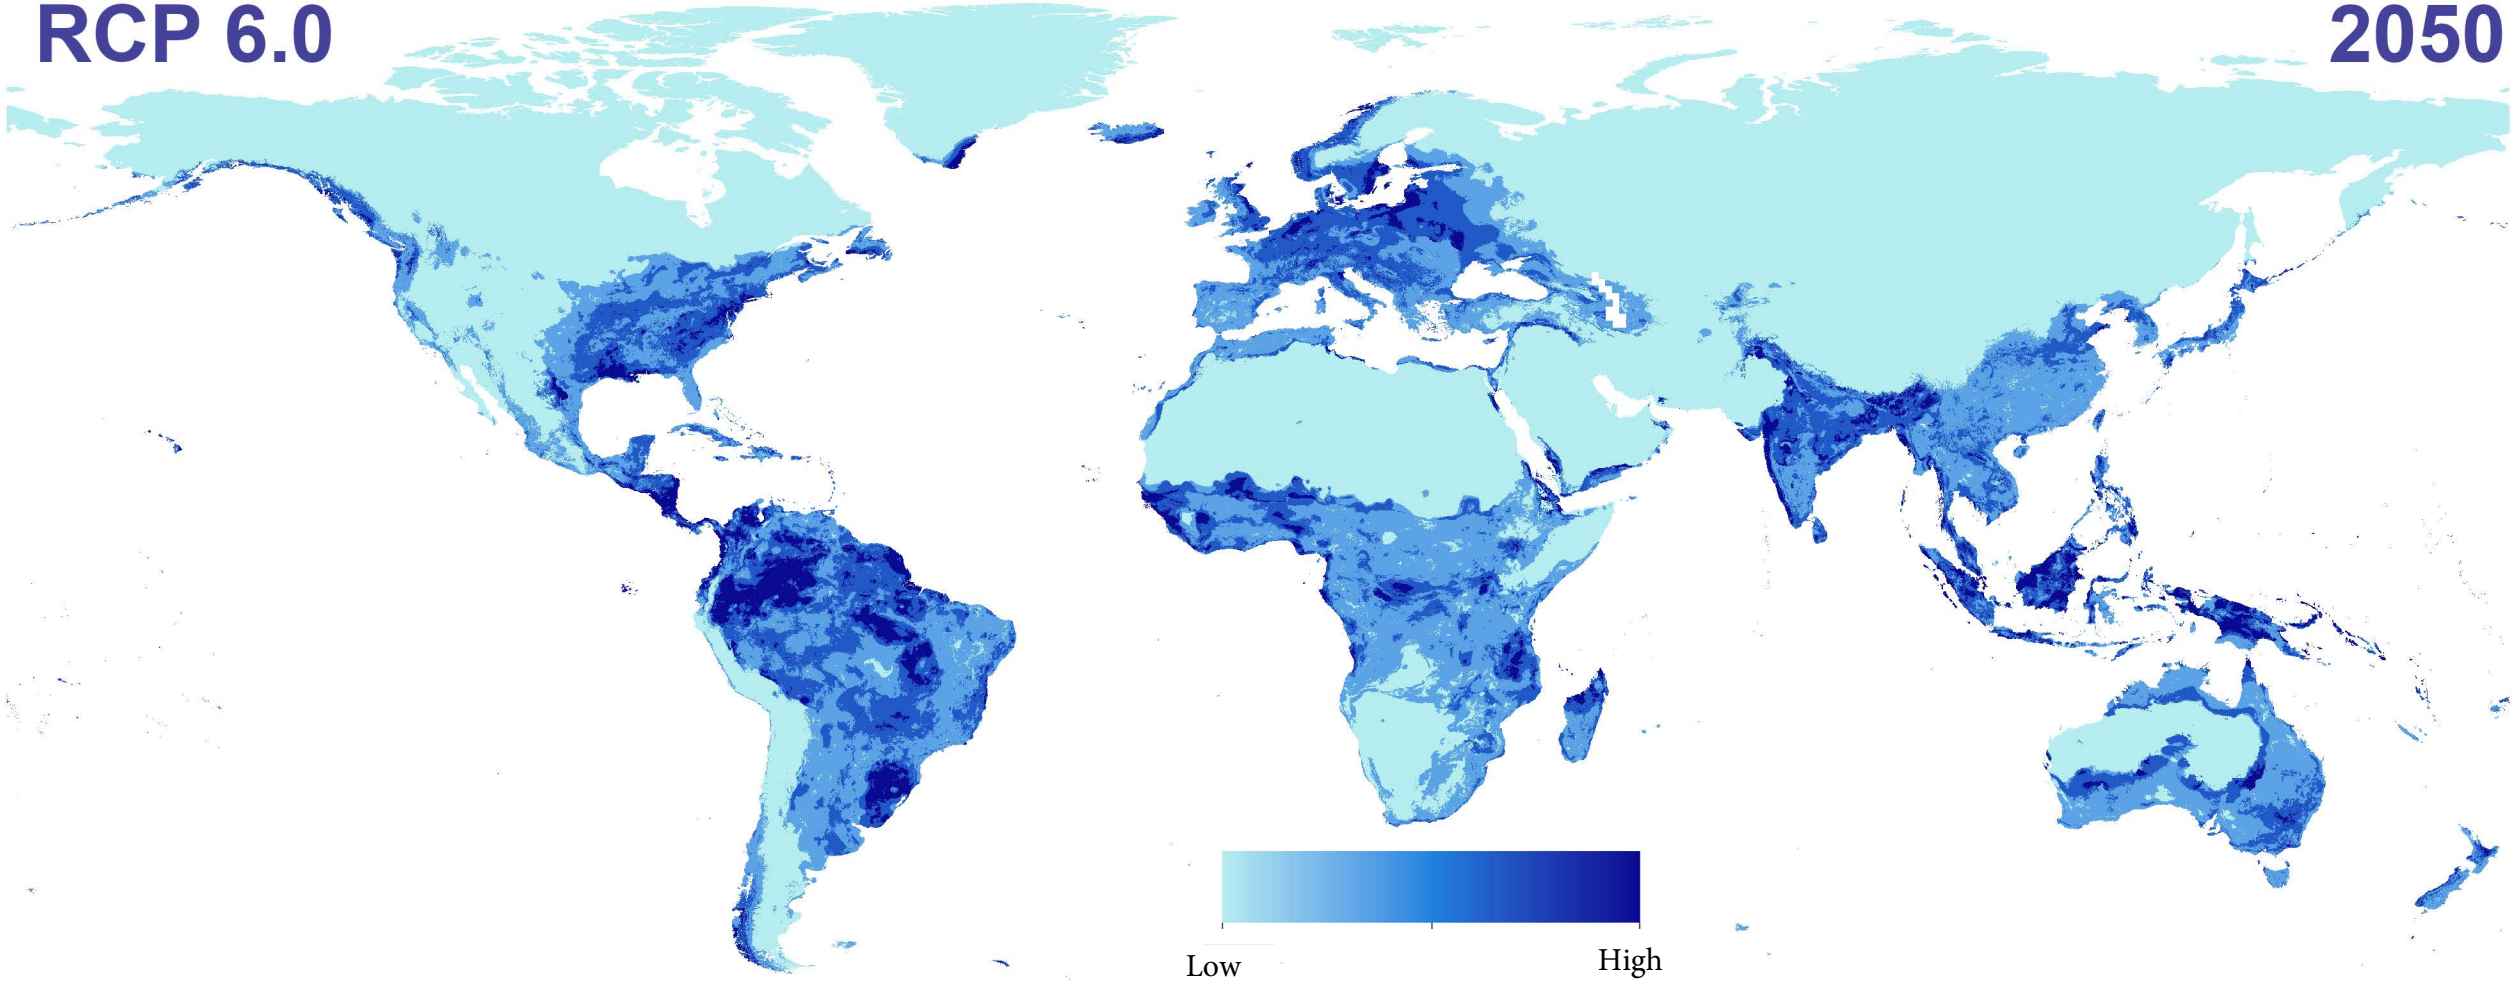



RCP 8.5

2050

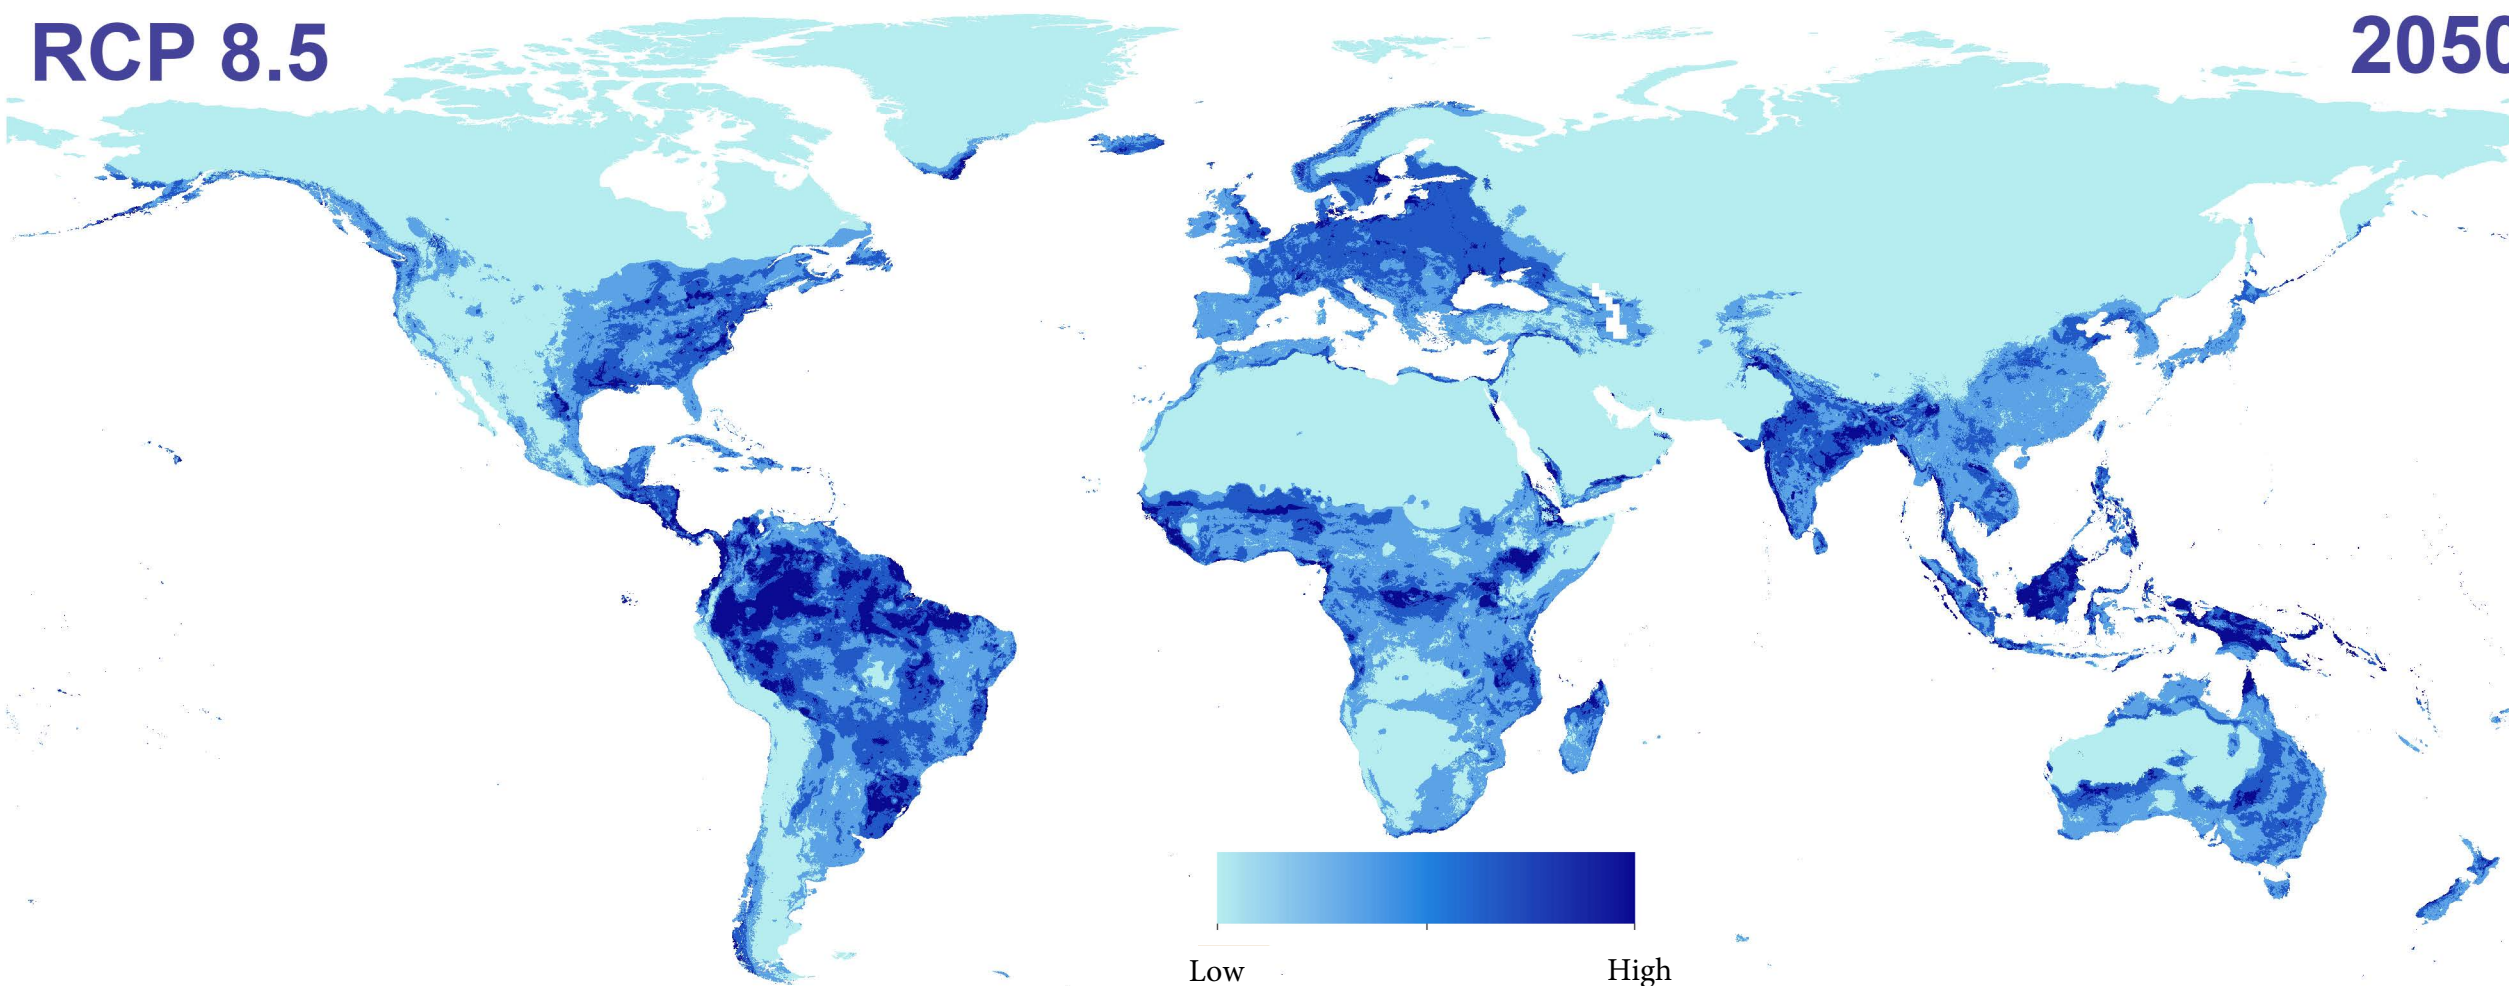

Low

High

VI. Visualization of uncertainty estimate associated with future predictions of *Aedes albopictus* based on diverse representative concentration pathways (RCPs) in 2070. Uncertainty index was derived from diverse GCMs in each RCP in the study; uncertainty index was estimated as the range (maximum—minimum) across all combinations of GCMs in each RCP.



RCP 2.6

2070

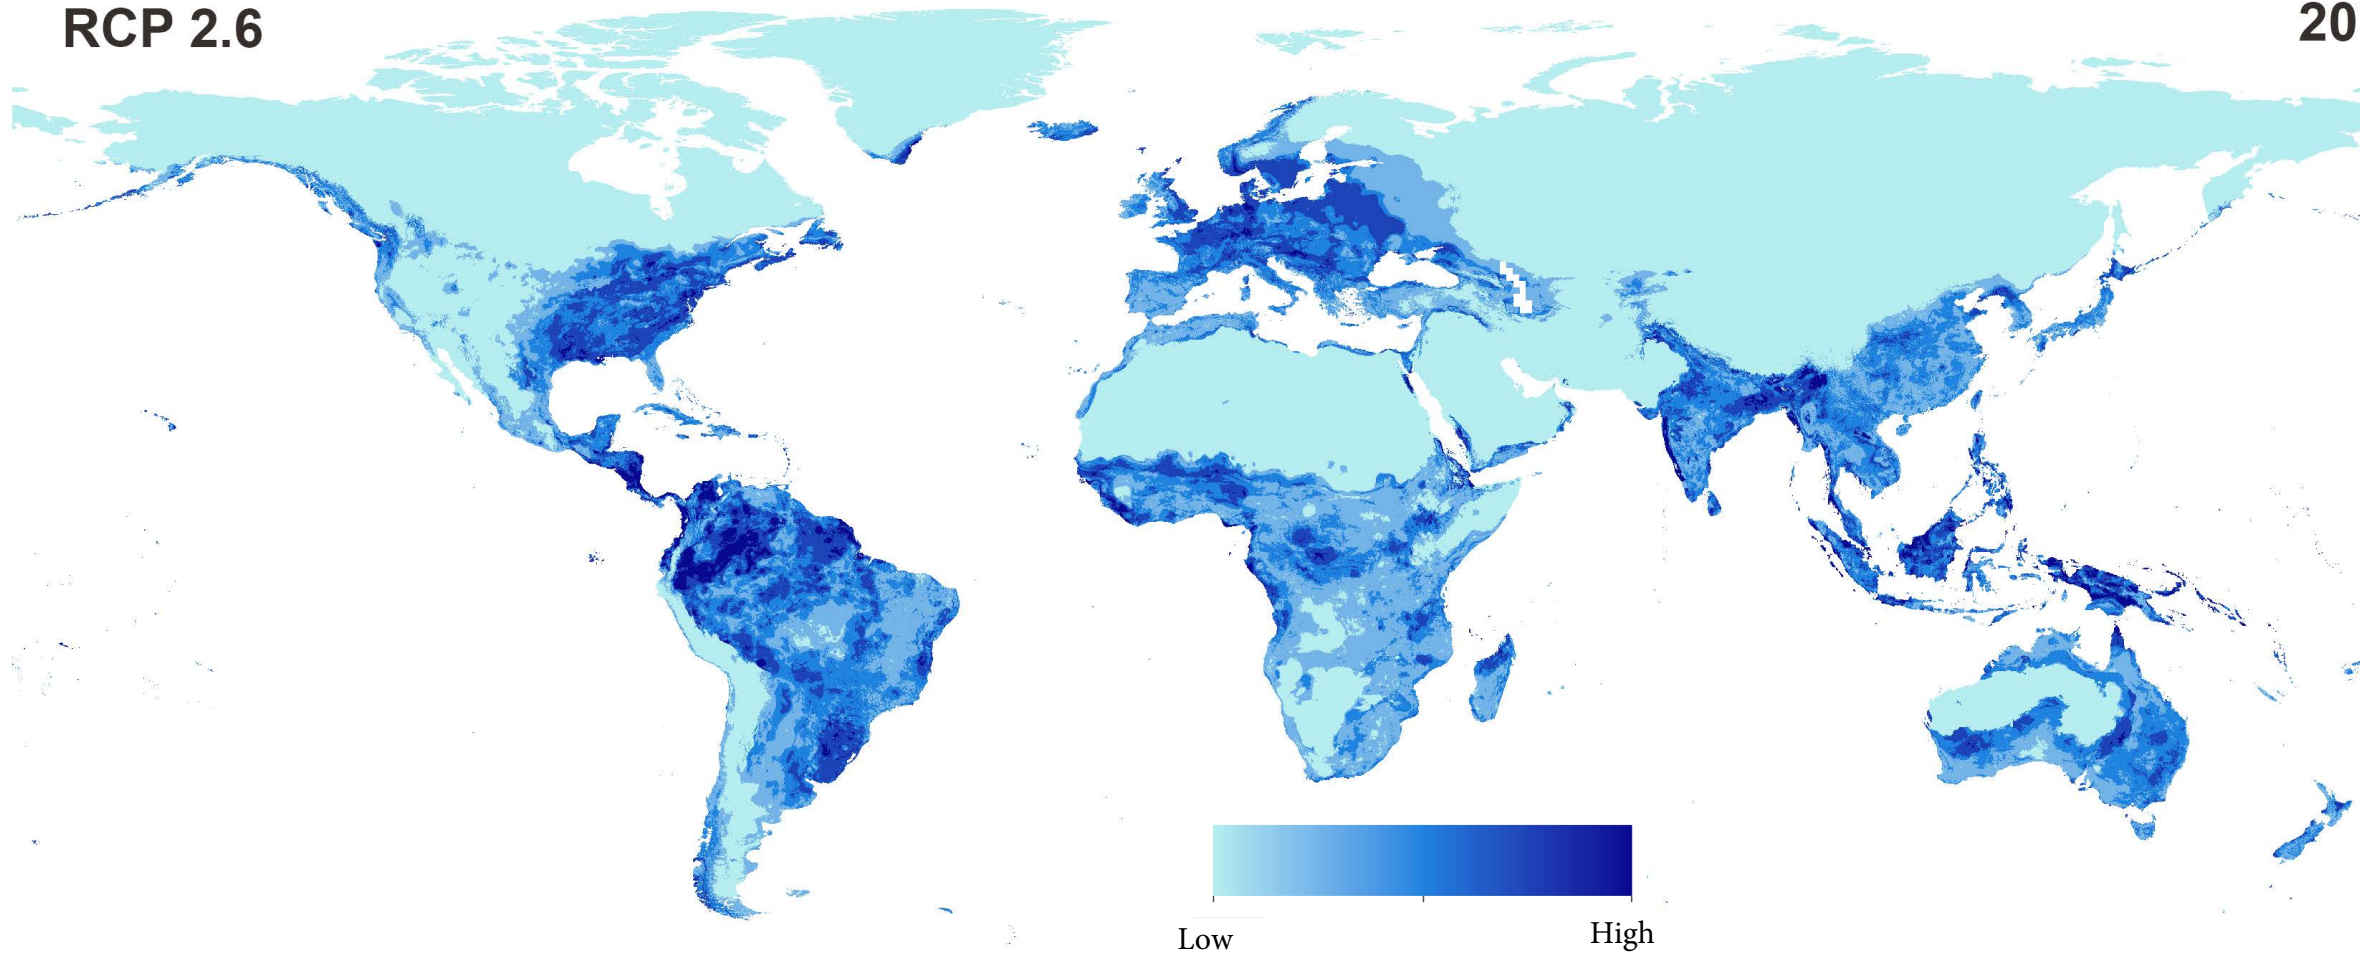

RCP 4.5

2070

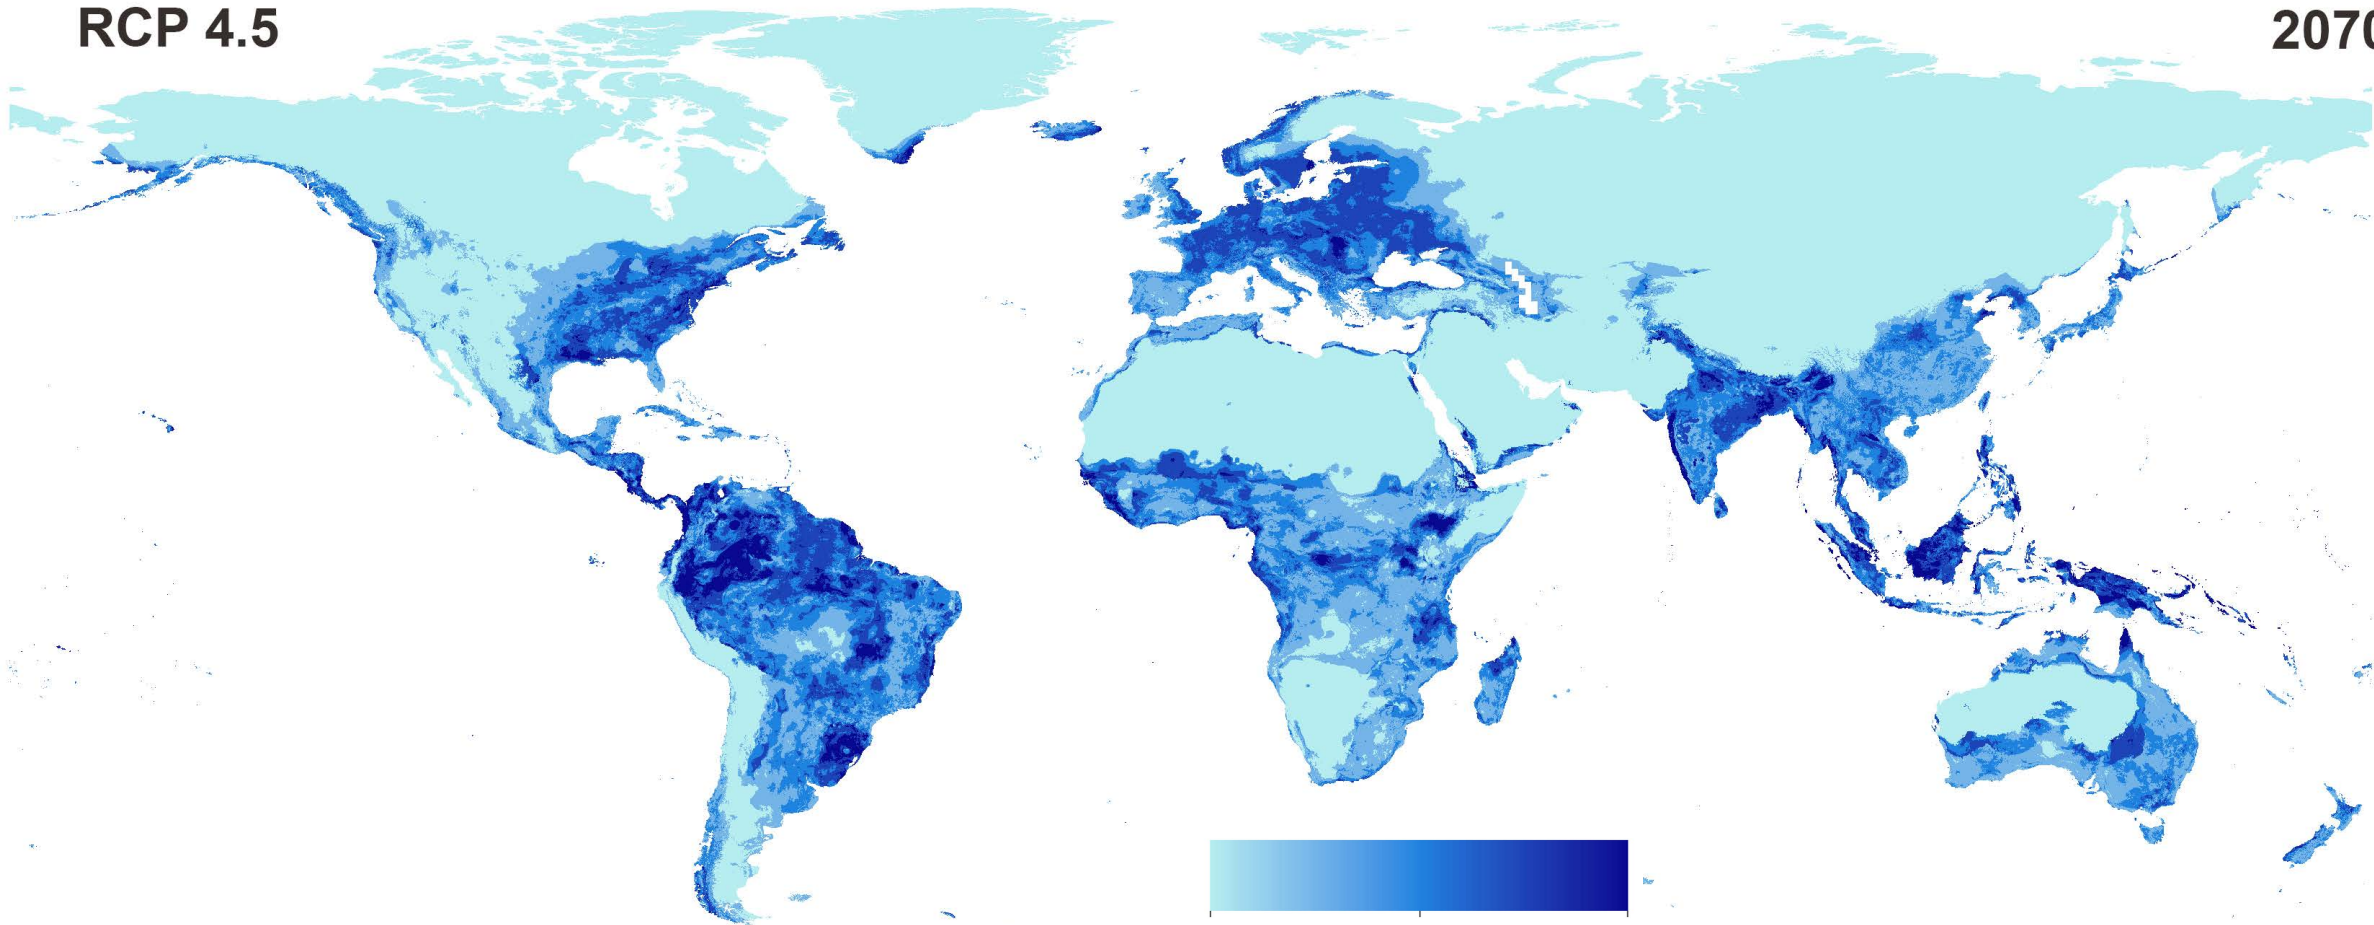

Low

High



RCP 6.0

2070

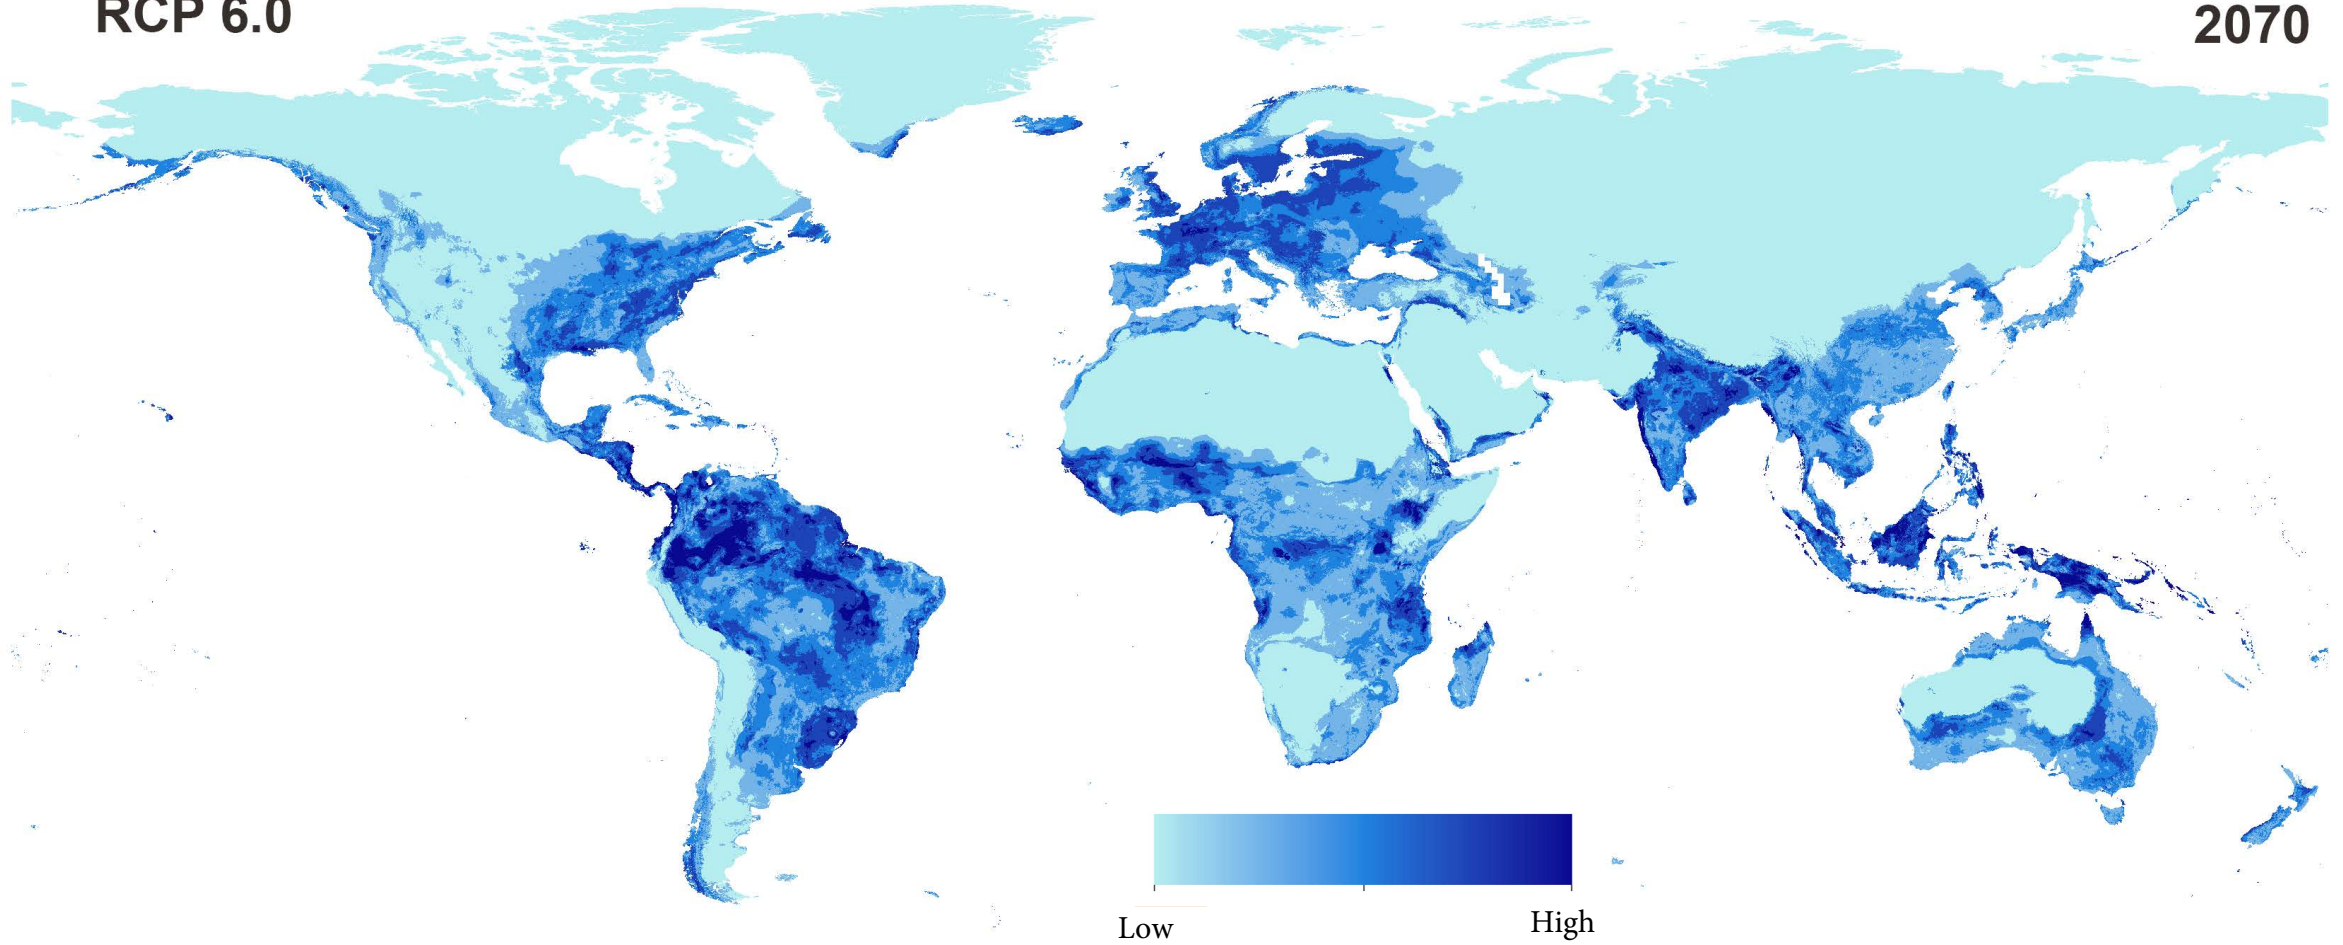

RCP 8.5

2070

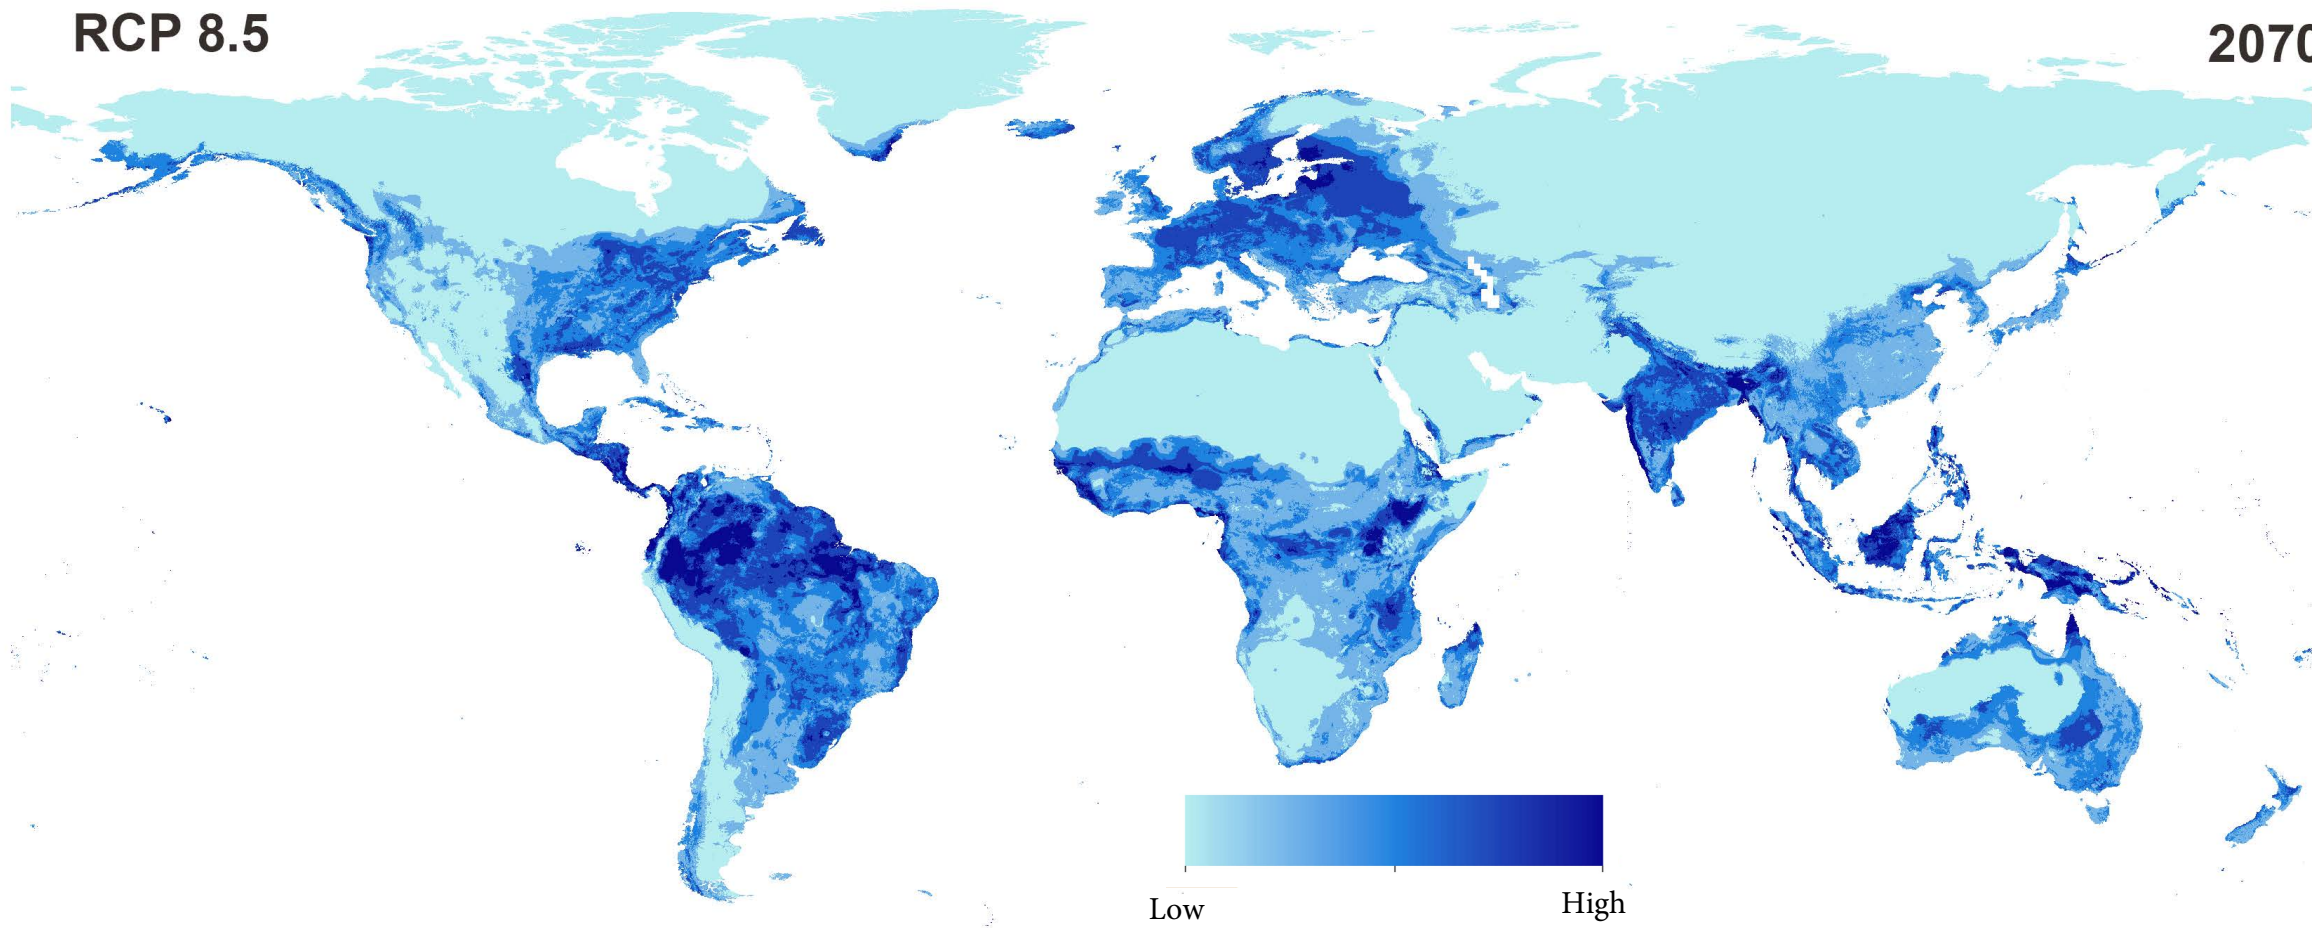

Supplement: pone.0210122.s011.pdf [file pone.0210122.s011.pdf]
