# Supplementary material for: Mapping the global potential distributions of two arboviral vectors Aedes aegypti and Ae. albopictus under changing climate
Source: PubMed Central journal article supplement (PMC6312308; doi:10.1371/journal.pone.0210122), 2018-12-31
Supplement: pone.0210122.s001.pdf [file pone.0210122.s001.pdf]

S1 File: List of general circulation models used in the ecological niche modeling analyses of *Aedes aegypti* and *Ae. albopictus* under future climatic conditions.

| <b>Name of GCM*</b>   | <b>Code</b> |
|-----------------------|-------------|
| <b>BCC-CSM1-1</b>     | <b>BC</b>   |
| <b>CCSM4</b>          | <b>CC</b>   |
| <b>GISS-E2-R</b>      | <b>GS</b>   |
| <b>HadGEM2-AO</b>     | <b>HD</b>   |
| <b>HadGEM2-ES</b>     | <b>HE</b>   |
| <b>IPSL-CM5A-LR</b>   | <b>IP</b>   |
| <b>MIROC-ESM-CHEM</b> | <b>MI</b>   |
| <b>MIROC5</b>         | <b>MC</b>   |
| <b>MRI-CGCM3</b>      | <b>MG</b>   |

\* We removed two additional common GCMs (NorESM 1-M, and MIROC-ESM) due to problems in some of their variables. So, the analyses used only 9 GCMs/RCP/Year.
