# Supplementary material for: Mapping the global potential distributions of two arboviral vectors Aedes aegypti and Ae. albopictus under changing climate
Source: PubMed Central journal article supplement (PMC6312308; doi:10.1371/journal.pone.0210122), 2018-12-31
Supplement: pone.0210122.s005.pdf [file pone.0210122.s005.pdf]

S5 File. Current potential distribution of *Aedes albopictus* in Red Sea coasts based on present-day conditions. Navy blue shaded areas were modeled as suitable; gray areas were modeled as unsuitable.



**Egypt**

**Red Sea**
