# Supplementary material for: Mapping the global potential distributions of two arboviral vectors Aedes aegypti and Ae. albopictus under changing climate
Source: PubMed Central journal article supplement (PMC6312308; doi:10.1371/journal.pone.0210122), 2018-12-31

S6 File. Relationship of additional independent records of *Ae. aegypti* and *Ae. albopictus* to areas predicted as suitable for *Ae. aegypti* and *Ae. albopictus*, respectively. Yellow points are independent occurrence data from the Old World and North America. Blue areas are represented as suitable and gray as unsuitable.

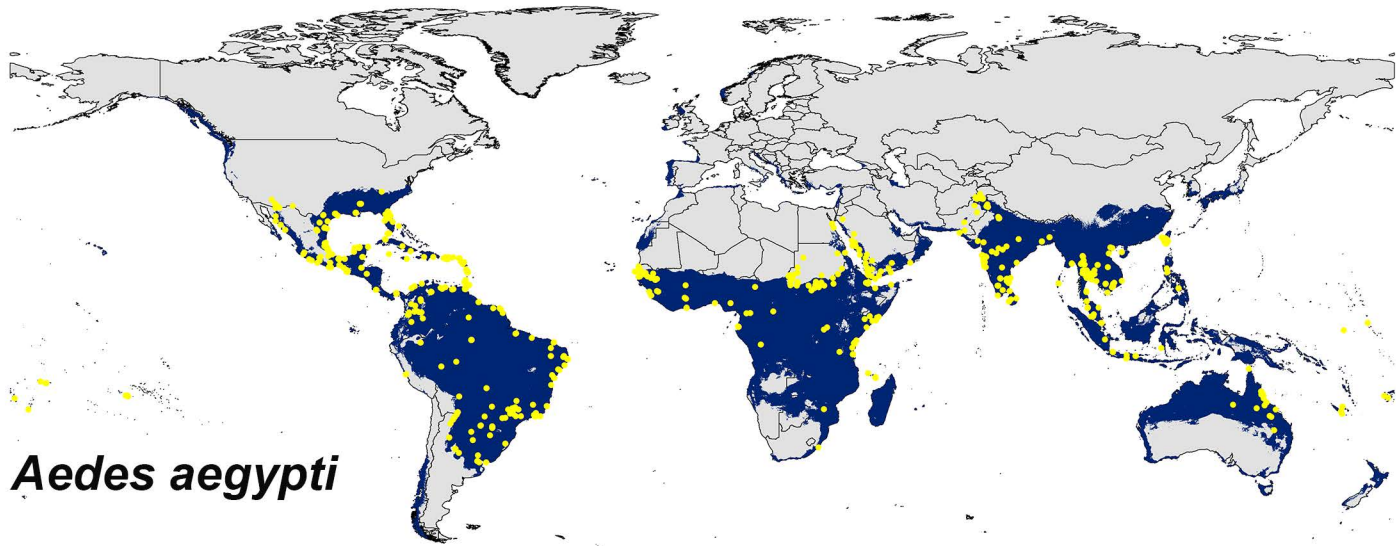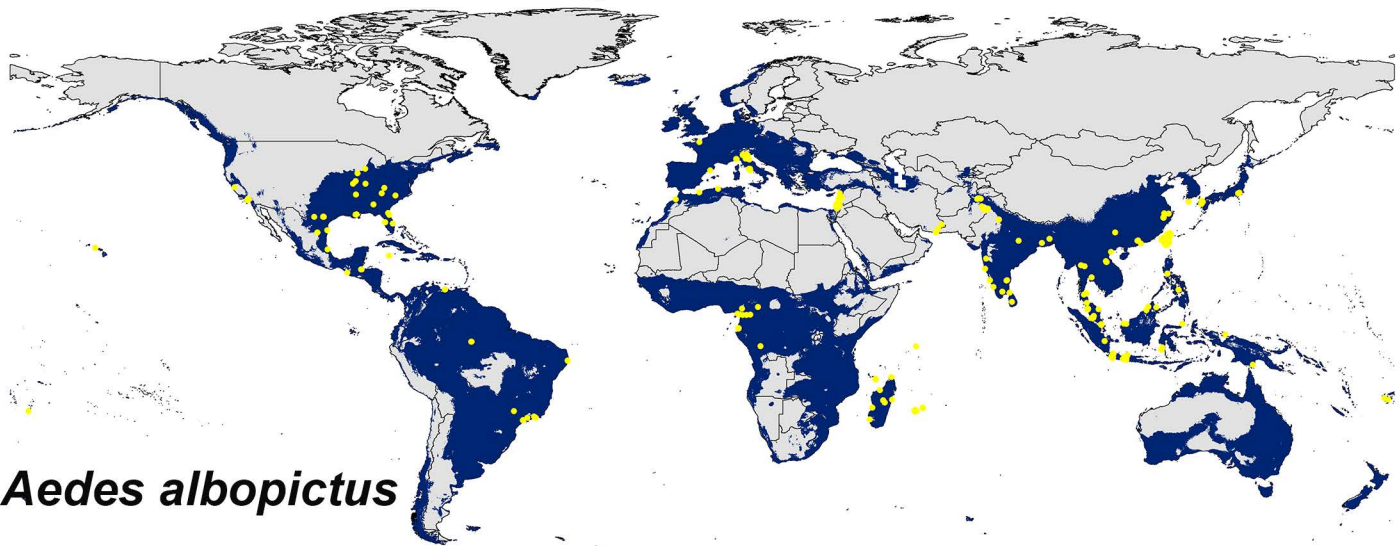

Supplement: pone.0210122.s006.pdf [file pone.0210122.s006.pdf]
