# Supplementary material for: Mapping the global potential distributions of two arboviral vectors Aedes aegypti and Ae. albopictus under changing climate
Source: PubMed Central journal article supplement (PMC6312308; doi:10.1371/journal.pone.0210122), 2018-12-31

S7 File. Predicted future potential distribution of *Aedes aegypti* under four future representative concentration pathways of climate conditions in 2070. Brown areas are modeled suitable conditions; gray areas are unsuitable conditions.

**RCP 2.6**

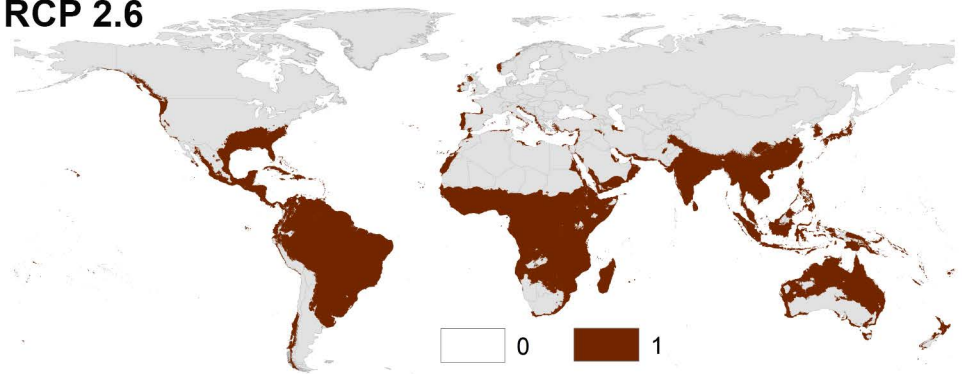

**RCP 4.5**

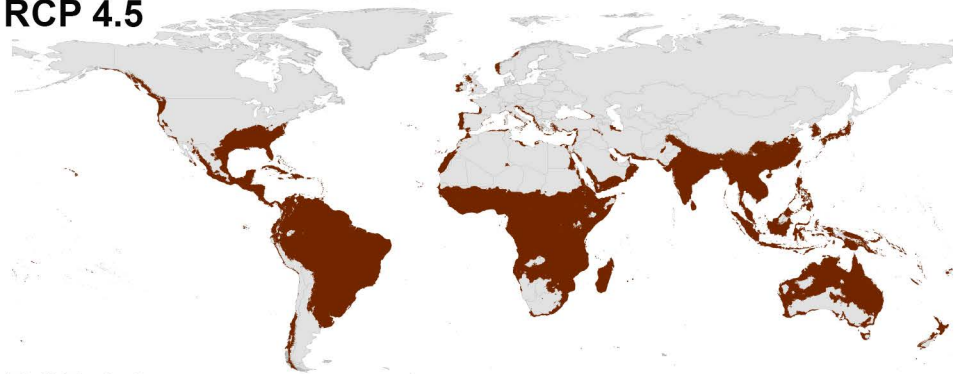

**RCP 6.0**

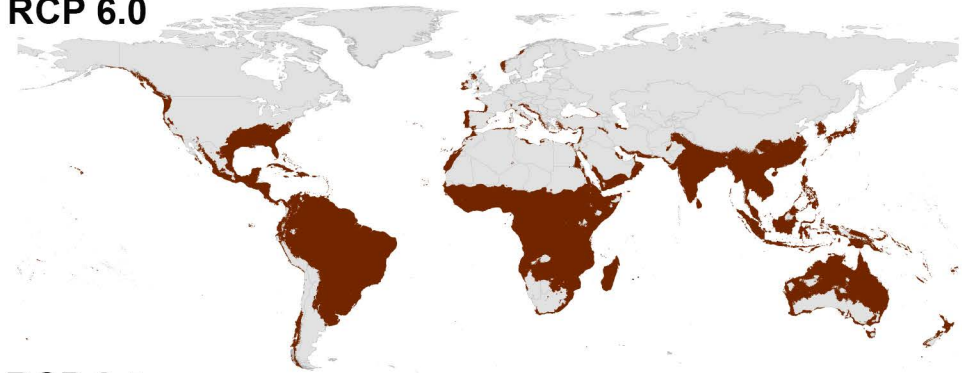

**RCP 8.5**

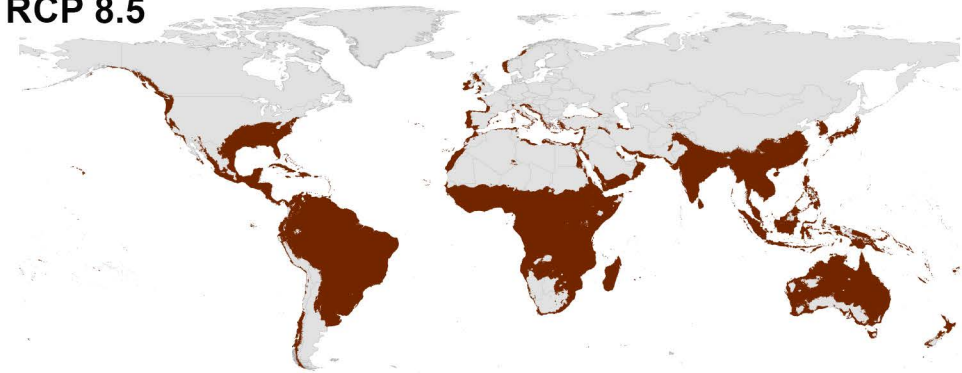

Supplement: pone.0210122.s007.pdf [file pone.0210122.s007.pdf]
